# Supplementary material for: Study on the ArI-catalyzed intramolecular oxy-cyclization of 2-alkenylbenzamides to benzoiminolactones
Source: Royal Society of Chemistry journal article supplement (doi:10.1039/d0ob00612b), 2020-01-01

## Electronic Supplementary Information

### Study on the ArI-catalyzed Intramolecular Oxy-Cyclization of 2-Alkenylbenzamides to Benzoiminolactones

Huixia Liu, Xiaojun Deng, Xie Huang, Nan Ji, Wei He\*

*Department of Chemistry, School of Pharmacy, The Fourth Military Medical  
University, 169 Changle West Road, Xi'an 710032, P. R. China.*

*E-mail: [weihechem@fmmu.edu.cn](mailto:weihechem@fmmu.edu.cn).*

#### Contents

|                                                                                                    |    |
|----------------------------------------------------------------------------------------------------|----|
| 1. Synthesis of iodine reagents and substrates .....                                               | 3  |
| 2. Optimization of the reaction conditions .....                                                   | 10 |
| 3. General procedure for the reaction of 2-alkenylbenzamides .....                                 | 14 |
| 4. Transformation of the products .....                                                            | 31 |
| 5. Control experiments .....                                                                       | 33 |
| 6. Comparison of the structure data of <b>2a</b> , <b>2s</b> and <b>2t</b> with the reported ..... | 39 |
| 7. Reference .....                                                                                 | 41 |
| 8. <sup>1</sup> H, <sup>13</sup> C and <sup>19</sup> F NMR spectra .....                           | 42 |

## General information

All commercially available reagents and solvents, unless otherwise notes, were used without further purification. Thin layer chromatography (TLC) was used to monitor reaction progress performed on GF-254 silica gel plates (0.2 mm). Flash column chromatography (200-300 mesh silica gel purchased from Yantai, China and 200-300 mesh Alumina-B purchased from Greagent) eluted with the gradient of petroleum ether (PE) and ethyl acetate (EtOAc) was used to isolate and purify products. Nuclear magnetic resonance (NMR) spectra were recorded on Bruker ADVANCE III 400 MHz (or Bruker ADVANCE III 600 MHz) using CDCl<sub>3</sub> as solvent (CDCl<sub>3</sub>,  $\delta = 7.26$  ppm for <sup>1</sup>H NMR,  $\delta = 77.0$  ppm for <sup>13</sup>C NMR). <sup>1</sup>H NMR experiments used CD<sub>3</sub>CN as solvent (CD<sub>3</sub>CN,  $\delta = 1.94$  ppm). Chemical shift are presented as: multiplicities (s = singlet, d = doublet, t = triplet, q = quartet, m = multiplet, br = broad). Coupling constant (Hz) were given as a *J* value. MS was recorded on Agilent 6260C Liquid Chromatograph Mass Spectrometer. HRMS was performed on Waters I-Class VION IMS Q-ToF Mass Spectrometer of Instrument Analysis Center of Xi'an Jiaotong University.

## 1. Synthesis of iodine reagents and substrates

Iodine reagents **I1-I6**, **PIDA** were all commercially available. **I7**,<sup>1</sup> **I8**<sup>1</sup> and **I6(OAc)**<sub>2</sub><sup>2</sup> are known compounds and were synthesized according to the methods of reported literature. Substrates **1a-1r**,<sup>3</sup> **1s-1ab**,<sup>3,4</sup> **1ac-1ag**,<sup>3,5</sup> **1ah**,<sup>3</sup> **1ai-1aj**<sup>3,6</sup> and **1ak**<sup>3,7</sup> were synthesized according to the methods of reported literature and typical procedures for their synthesis were described below. Among them, **1d**, **1i**, **1j**, **1q** and **1v-1ab** are new compounds and were characterized by <sup>1</sup>H NMR, <sup>13</sup>C NMR and HRMS.

### 2.1 Typical procedures for the synthesis of substrates 1a-1r, 1ah-1ak

Take the synthesis of **1d** as an example.

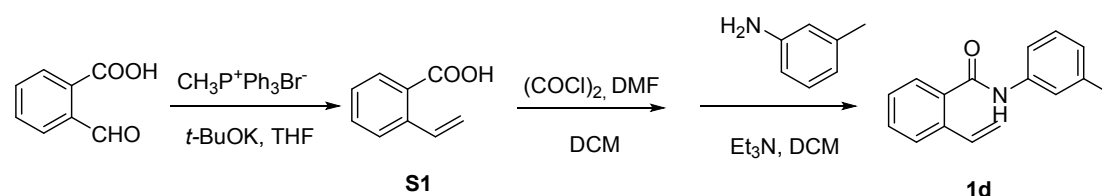

A 250 mL three necked bottle charged with methyl triphenylphosphonium bromide (7.2 g, 20.0 mmol) and  $t\text{-BuOK}$  (3.4 g, 30.0 mmol) was added anhydrous THF (50.0 mL) under argon protection and stirred. After 1 h, a solution of 2-carboxybenzaldehyde (1.5 g, 10.0 mmol) in dry THF (10.0 mL) was added through syringe and refluxed overnight. The reaction solution was detected by TLC until completely finished. After cooling down, the mixture quenched with saturated  $\text{NH}_4\text{Cl}$  solution (20 mL), extracted with  $\text{EtOAc}$  (30 mL  $\times$  3), the organic layer was separated and concentrated *in vacuo*. The residue was purified by flash chromatography on silica gel ( $\text{PE}:\text{EtOAc} = 5:1$ ) to give the compound **S1** (1.3 g, 89%) as a white solid.

To a stirring solution of **S1** (740 mg, 5 mmol) in dry DCM (10 mL) was added  $(\text{COCl})_2$  (2.1 mL, 25 mmol) and a drop of DMF. The resulting mixture was stirred for 1 h. Then, the above mixture was slowly added to a solution of  $m\text{-toluidine}$  (642 mg, 6 mmol) and  $\text{Et}_3\text{N}$  (1.4 mL, 10 mmol) in DCM (10 mL) through syringe at 0 °C. After been stirred at room temperature for 3 h, the reaction mixture was quenched with  $\text{H}_2\text{O}$  (20 mL) and aqueous solution was acidified to  $\text{pH} = 1$  with 2 N  $\text{HCl}$  solution. The

organic layer was separated and the aqueous layer was extracted with DCM (20 mL × 3). The combined organic layer was dried over anhydrous Na<sub>2</sub>SO<sub>4</sub>, filtered, and concentrated *in vacuo*. The residue was purified by flash column chromatography on silica gel (PE:EtOAc = 5:1) to afford desired product **1d** (749 mg, 79%) as a white solid.

## 2.2 Typical procedures for the synthesis of substrates 1s-1ab

Take the synthesis of **1v** as an example.

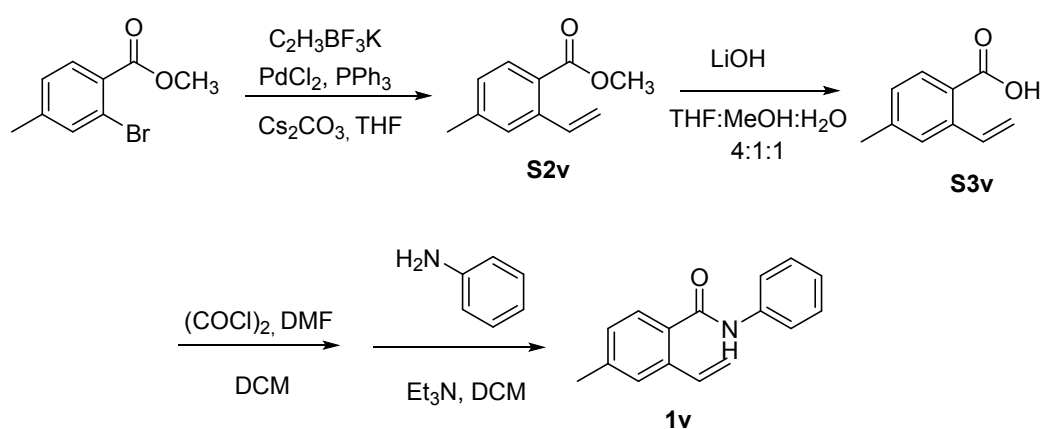

A 250 mL three necked bottle was charged with methyl 2-bromo-4-methylbenzoate (1.1 g, 5 mmol), cesium carbonate (4.6 g, 7.0 mmol), triphenylphosphine (136 mg, 5.2 mmol), potassium vinyltrifluoroborate (700 mg, 5.2 mmol), palladium (II) chloride (36 mg 1 mmol), THF (18 mL) and degassed water (2 mL). The reaction mixture was stirred at 70 °C under argon protection for 40 h, which was detected by TLC until completely finished. After cooling down, the reaction mixture was diluted with DCM (50 mL) and filtered over celite. The organic layer was separated and concentrated *in vacuo*. The residue was purified by flash chromatography on silica gel (PE:EtOAc = 8:1) to give the compound **S2v** (730 mg, 86%) as a colorless oil.

To a solution of **S2v** (730 mg, 4.1 mmol) in a mixed solvent (30 mL, THF: MeOH: H<sub>2</sub>O = 4:1:1) was added lithium hydroxide (196 mg, 8.2 mmol). The reaction mixture was heated at 70 °C for 5 h, which was detected by TLC until completely finished. After cooling down, the reaction mixture was concentrated *in vacuo* to remove THF and then adjusted to pH = 1 using 2 N HCl solution. The mixture was extracted with

DCM (20 mL × 2). The combined organic layer was dried over Na<sub>2</sub>SO<sub>4</sub>, filtered, and concentrated *in vacuo*. The residue was purified by flash column chromatography on silica gel (PE:EtOAc = 5:1-3:1) to yield the compound **S3v** (680 mg, 99%) as a white solid.

To a stirring solution of **S3v** (650 mg, 4 mmol) in dry DCM (10 mL) was added (COCl)<sub>2</sub> (2.1 mL, 25 mmol) and a drop of DMF. The resulting mixture was stirred for 1 h. Then, the above mixture was slowly added to a solution of aniline (558 mg, 6 mmol) and Et<sub>3</sub>N (1.4 mL, 10 mmol) in DCM (10 mL) through syringe at 0 °C. After being stirred at room temperature for 3 h, the reaction mixture was quenched with H<sub>2</sub>O (20 mL) and aqueous solution was acidified to pH = 1 with 2 N HCl solution. The organic layer was separated and the aqueous layer was extracted with DCM (20 mL × 3). The combined organic layer was dried over anhydrous Na<sub>2</sub>SO<sub>4</sub>, filtered, and concentrated *in vacuo*. The residue was purified by flash column chromatography on silica gel (PE:EtOAc = 5:1) to afford desired product **1v** (635 mg, 67%) as a white solid.

### 2.3 Characterization data of the new substrates

#### *N*-(*m*-tolyl)-2-vinylbenzamide (**1d**):

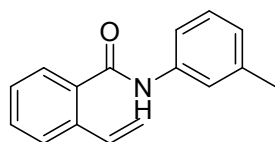

**1d**

White solid (749 mg, 79%); m.p. 117.9–118.5 °C; <sup>1</sup>H NMR (400 MHz, CDCl<sub>3</sub>) δ 7.59 (t, *J* = 8.0 Hz, 2H), 7.52-7.41 (m, 3H), 7.36 (q, *J* = 7.6, 7.2 Hz, 2H), 7.25 (t, *J* = 8.0 Hz, 1H), 7.11 (dd, *J* = 17.6, 11.2 Hz, 1H), 6.98 (d, *J* = 7.6 Hz, 1H), 5.77 (dd, *J* = 17.6, 1.2 Hz, 1H), 5.40 (dd, *J* = 11.2, 1.2 Hz, 1H), 2.37 (s, 3H); <sup>13</sup>C NMR (100 MHz, CDCl<sub>3</sub>) δ 167.3, 139.1, 137.8, 136.0, 135.4, 134.5, 130.6, 128.9, 127.9, 127.6, 126.6, 125.5, 120.4, 117.3, 116.7, 21.5; HRMS: [M+H]<sup>+</sup> calcd for C<sub>16</sub>H<sub>15</sub>NO 238.1226, found 238.1224.

#### *N*-(2-chlorophenyl)-2-vinylbenzamide (**1i**):

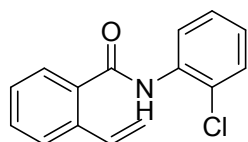

**1i**

White solid (874 mg, 85%); m.p. 114.5–115.5 °C; <sup>1</sup>H NMR (400 MHz, CDCl<sub>3</sub>) δ 8.58 (d, *J* = 8.4 Hz, 1H), 8.07 (s, 1H), 7.64 (t, *J* = 8.0 Hz, 2H), 7.52 – 7.46 (m, 1H), 7.45 – 7.37 (m, 2H), 7.37 – 7.29 (m, 1H), 7.17 (dd, *J* = 17.6, 11.2 Hz, 1H), 7.13 – 7.03 (m, 1H), 5.79 (dd, *J* = 17.6, 1.2 Hz, 1H), 5.43 (dd, *J* = 10.8, 1.2 Hz, 1H); <sup>13</sup>C NMR (100 MHz, CDCl<sub>3</sub>) δ 167.2, 136.5, 134.8, 134.7, 134.4, 131.0, 129.1, 128.0, 127.8, 127.7, 126.9, 124.9, 123.1, 121.6, 117.8; HRMS: [M+H]<sup>+</sup> calcd for C<sub>15</sub>H<sub>12</sub>ClNO 258.0680, found 258.0680.

***N*-(3-chlorophenyl)-2-vinylbenzamide (1j):**

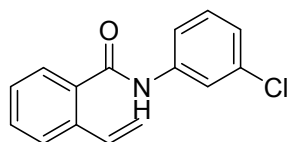

**1j**

White solid (894 mg, 87%); m.p. 113.3–115.7 °C; <sup>1</sup>H NMR (400 MHz, CDCl<sub>3</sub>) δ 7.74 (t, *J* = 2.0 Hz, 1H), 7.69 (s, 1H), 7.61 – 7.48 (m, 2H), 7.48 – 7.38 (m, 2H), 7.36 – 7.20 (m, 2H), 7.15 – 6.98 (m, 2H), 5.75 (dd, *J* = 17.6, 1.2 Hz, 1H), 5.39 (dd, *J* = 11.2, 1.2 Hz, 1H); <sup>13</sup>C NMR (100 MHz, CDCl<sub>3</sub>) δ 167.7, 139.1, 136.0, 134.7, 134.7, 134.2, 130.8, 130.0, 127.8, 127.5, 126.6, 124.6, 120.0, 118.0, 117.4; HRMS: [M+H]<sup>+</sup> calcd for C<sub>15</sub>H<sub>12</sub>ClNO 258.0680, found 258.0680.

***N*-neopentyl-2-vinylbenzamide (1q):**

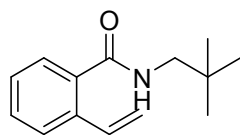

**1q**

White solid (739 mg, 91%); m.p. 110.2–112.0 °C; <sup>1</sup>H NMR (400 MHz, CDCl<sub>3</sub>) δ 7.57 (d, *J* = 8.0 Hz, 1H), 7.48 (dd, *J* = 7.6, 1.2 Hz, 1H), 7.44 – 7.37 (m, 1H), 7.35 – 7.28 (m, 1H), 7.07 (dd, *J* = 17.6, 11.2 Hz, 1H), 5.81 (s, 1H), 5.73 (dd, *J* = 17.6, 1.2 Hz, 1H), 5.37 (dd, *J* = 11.2, 1.2 Hz, 1H), 3.27 (d, *J* = 6.4 Hz, 2H), 0.98 (s, 9H); <sup>13</sup>C NMR (100 MHz, CDCl<sub>3</sub>) δ 169.4, 135.9, 135.8, 134.8, 130.1, 127.8, 127.4,

126.3, 116.8, 51.1, 32.0, 27.3 (3C); HRMS:  $[M+H]^+$  calcd for  $C_{14}H_{19}NO$  218.1539, found 218.1539.

#### 4-Methyl-*N*-phenyl-2-vinylbenzamide (1v):

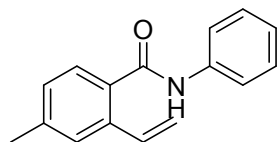

**1v**

White solid (635 mg, 67%); m.p. 114.5–115.6 °C;  $^1H$  NMR (400 MHz,  $CDCl_3$ )  $\delta$  7.61 (d,  $J = 8.0$  Hz, 2H), 7.56 – 7.44 (m, 2H), 7.37 (dd,  $J = 14.0, 6.4$  Hz, 3H), 7.16 (dd,  $J = 7.6, 4.0$  Hz, 2H), 7.14 – 7.04 (m, 1H), 5.75 (d,  $J = 18.4$  Hz, 1H), 5.38 (d,  $J = 11.6$  Hz, 1H), 2.41 (s, 3H);  $^{13}C$  NMR (100 MHz,  $CDCl_3$ )  $\delta$  167.3, 140.9, 138.0, 136.1, 134.7, 132.5, 129.1 (2C), 128.7, 127.8 (2C), 127.4, 124.5, 119.7, 117.1, 21.5; HRMS:  $[M+H]^+$  calcd for  $C_{16}H_{15}NO$  238.1226, found 238.1225.

#### 4-Fluoro-*N*-phenyl-2-vinylbenzamide (1w):

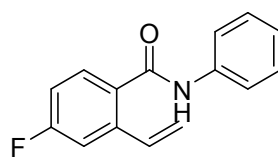

**1w**

White solid (858 mg, 89%); m.p. 109.5–110.9 °C; m.p. 109.5–110.9 °C;  $^1H$  NMR (400 MHz,  $CDCl_3$ )  $\delta$  7.67 – 7.54 (m, 4H), 7.36 (t,  $J = 8.0$  Hz, 2H), 7.30 – 7.23 (m, 1H), 7.16 (t,  $J = 7.2$  Hz, 1H), 7.12 – 6.96 (m, 2H), 5.76 (d,  $J = 17.6$  Hz, 1H), 5.44 (d,  $J = 10.8$  Hz, 1H);  $^{13}C$  NMR (100 MHz,  $CDCl_3$ )  $\delta$  166.5, 165.1, 162.59, 138.9 (d,  $J_{CF} = 8.2$  Hz), 137.8, 133.5 (d,  $J_{CF} = 2.2$  Hz), 131.5, 129.9 (d,  $J_{CF} = 8.9$  Hz), 129.1, 124.8, 119.9, 118.4, 114.9 (d,  $J_{CF} = 21.8$  Hz), 113.2 (d,  $J_{CF} = 22.2$  Hz);  $^{19}F$  NMR (376 MHz,  $CDCl_3$ )  $\delta$  -109.4; HRMS:  $[M+H]^+$  calcd for  $C_{15}H_{12}FNO$  242.0975, found 242.0973.

#### 4-Chloro-*N*-phenyl-2-vinylbenzamide (1x):

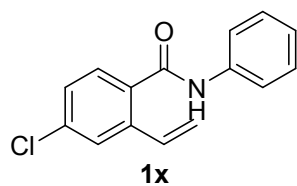

White solid (853 mg, 83%); m.p. 118.5–119.8 °C; <sup>1</sup>H NMR (400 MHz, CDCl<sub>3</sub>) δ 7.64 – 7.48 (m, 5H), 7.42 – 7.28 (m, 3H), 7.17 (t, *J* = 7.6 Hz, 1H), 7.05 (dd, *J* = 17.6, 10.8 Hz, 1H), 5.78 (d, *J* = 17.6 Hz, 1H), 5.45 (d, *J* = 10.8 Hz, 1H); <sup>13</sup>C NMR (100 MHz, CDCl<sub>3</sub>) δ 166.4, 137.9, 137.7, 136.8, 133.4, 129.2 (2C), 129.1, 127.9, 126.7, 124.9, 120.1, 119.9, 119.8, 118.6; HRMS: [M+H]<sup>+</sup> calcd for C<sub>15</sub>H<sub>12</sub>ClNO 258.0680, found 258.0679.

**4-Nitro-*N*-phenyl-2-vinylbenzamide (1y):**

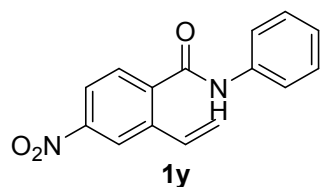

White solid (911 mg, 85%); m.p. 120.8–123.0 °C; <sup>1</sup>H NMR (400 MHz, CDCl<sub>3</sub>) δ 8.43 (t, *J* = 2.8 Hz, 1H), 8.16 (dd, *J* = 8.4, 2.4 Hz, 1H), 7.72 (d, *J* = 8.4 Hz, 1H), 7.61 (d, *J* = 7.6 Hz, 3H), 7.44 – 7.35 (m, 2H), 7.20 (d, *J* = 7.6 Hz, 1H), 7.11 – 7.01 (m, 1H), 5.95 (d, *J* = 17.6 Hz, 1H), 5.58 (d, *J* = 11.2 Hz, 1H); <sup>13</sup>C NMR (100 MHz, CDCl<sub>3</sub>) δ 165.5, 148.9, 140.4, 137.6, 137.2, 132.3, 129.3(2C), 128.8, 125.3, 122.4, 121.4, 120.2, 120.1 (2C); HRMS: [M+H]<sup>+</sup> calcd for C<sub>15</sub>H<sub>12</sub>N<sub>2</sub>O<sub>3</sub> 269.0921, found 269.0918.

***N*-phenyl-1-vinyl-2-naphthamide (1z):**

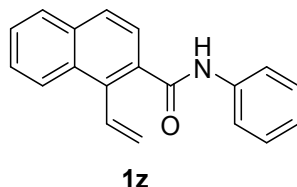

White solid (699 mg, 64%); m.p. 121.0–122.4 °C; <sup>1</sup>H NMR (400 MHz, CDCl<sub>3</sub>) δ 8.24 – 8.17 (m, 1H), 7.91 – 7.80 (m, 2H), 7.70 (dd, *J* = 8.4, 3.6 Hz, 1H), 7.67 – 7.51 (m, 5H), 7.37 (t, *J* = 8.0 Hz, 2H), 7.34 – 7.26 (m, 1H), 7.16 (t, *J* = 7.6 Hz, 1H), 5.81 (d, *J* = 11.6 Hz, 1H), 5.68 (d, *J* = 17.6 Hz, 1H); <sup>13</sup>C NMR (100 MHz, CDCl<sub>3</sub>) δ 168.1, 138.1, 134.2, 133.1, 132.7, 131.2, 129.4, 129.1 (2C), 128.3,



128.1, 127.1, 126.9, 126.0, 124.7, 124.6, 123.8, 122.8, 119.8; HRMS:  $[M+H]^+$  calcd for  $C_{19}H_{15}NO$  274.1226, found 274.1222.

**2-Methyl-N-phenyl-6-vinylbenzamide (1aa):**

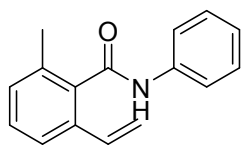

**1aa**

White solid (597 mg, 63%); m.p. 101.2–102.5 °C;  $^1H$  NMR (400 MHz,  $CDCl_3$ )  $\delta$  7.62 (dd,  $J = 8.4, 1.2$  Hz, 2H), 7.45 (d,  $J = 8.0$  Hz, 1H), 7.41 – 7.34 (m, 3H), 7.30 (t,  $J = 7.6$  Hz, 1H), 7.17 (t,  $J = 7.6$  Hz, 2H), 6.86 (dd,  $J = 17.2, 11.2$  Hz, 1H), 5.77 (dd,  $J = 17.2, 1.2$  Hz, 1H), 5.32 (dd,  $J = 10.8, 1.2$  Hz, 1H), 2.41 (s, 3H);  $^{13}C$  NMR (100 MHz,  $CDCl_3$ )  $\delta$  167.9, 137.7, 136.2, 135.0, 134.7, 133.9, 129.7, 129.3, 129.2 (2C), 124.8, 122.9, 119.9 (2C), 116.9, 19.2; HRMS:  $[M+H]^+$  calcd for  $C_{16}H_{15}NO$  238.1226, found 238.1225.

**2-Methyl-N-phenyl-6-vinylbenzamide (1ab):**

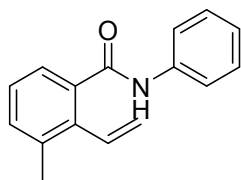

**1ab**

White solid (683 mg, 73%); m.p. 111.0–112.2 °C;  $^1H$  NMR (400 MHz,  $CDCl_3$ )  $\delta$  7.57 (d,  $J = 8.0$  Hz, 2H), 7.45 (d,  $J = 8.0$  Hz, 2H), 7.35 (t,  $J = 8.0$  Hz, 2H), 7.31 – 7.20 (m, 3H), 7.14 (t,  $J = 7.6$  Hz, 1H), 6.91 (dd,  $J = 18.0, 11.6$  Hz, 1H), 5.55 (d,  $J = 11.2$  Hz, 1H), 5.48 (d,  $J = 18.0$  Hz, 1H), 2.37 (s, 3H);  $^{13}C$  NMR (100 MHz,  $CDCl_3$ )  $\delta$  168.3, 138.1, 136.8, 136.3, 135.4, 133.8, 132.1, 129.1 (2C), 127.3, 125.7, 124.5, 120.9, 119.7 (2C), 20.6; HRMS:  $[M+H]^+$  calcd for  $C_{16}H_{15}NO$  238.1226, found 238.1226.

## 2. Optimization of the reaction conditions

**Table S1.** Influence of Lewis acid screening on the reaction.

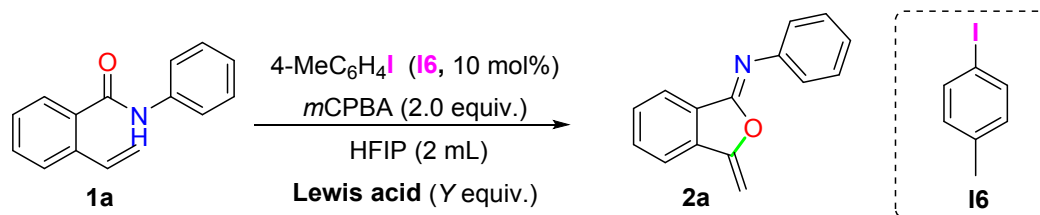

| Entry <sup>a</sup> | Lewis acid                                      | Equiv ( <i>Y</i> ) | Time   | Temp. (°C) | Yield <sup>b</sup> (%) |
|--------------------|-------------------------------------------------|--------------------|--------|------------|------------------------|
| 1                  | CF <sub>3</sub> COOH                            | 2.0                | 60 min | 25         | 15                     |
| 2                  | CH <sub>3</sub> SO <sub>3</sub> H               | 2.0                | 60 min | 25         | 23                     |
| 3                  | C <sub>7</sub> H <sub>7</sub> SO <sub>3</sub> H | 2.0                | 60 min | 25         | -                      |
| 4                  | CF <sub>3</sub> SO <sub>3</sub> H               | 2.0                | 60 min | 25         | -                      |
| 5                  | CH <sub>3</sub> COOH                            | 2.0                | 60 min | 25         | -                      |
| 6                  | BF <sub>3</sub> ·Et <sub>2</sub> O              | 2.0                | 30 min | 25         | 55                     |
| 7                  | BF <sub>3</sub> ·Et <sub>2</sub> O              | 1.0                | 30 min | 25         | 36                     |
| 8                  | BF <sub>3</sub> ·Et <sub>2</sub> O              | 1.2                | 30 min | 25         | 46                     |
| 9                  | BF <sub>3</sub> ·Et <sub>2</sub> O              | 1.5                | 30 min | 25         | 58                     |
| 10                 | BF <sub>3</sub> ·Et <sub>2</sub> O              | 0                  | 60 min | 25         | trace                  |

<sup>a</sup> Reaction conditions: **1a** (0.2 mmol), **I6** (10 mol%), *m*CPBA (0.4 mmol, 2.0 equiv.), **Lewis acid** (*Y* equiv.), HFIP (2 mL), air atmosphere; <sup>b</sup> Isolated yield.

**Experimental Procedure:** *m*CPBA (86.3 mg, 80%, 0.4 mmol) and **I6** (4.4 mg 0.02 mmol) were weighted into an oven-dried 10 mL Pyrex tube equipped with a magnetic stir bar. HFIP (2.0 mL) was added and the reaction mixture was stirred vigorously for 5 min. Then, **1a** (44.6 mg, 0.2 mmol) and **Lewis acid** was added in turn. The reaction mixture was stirred at room temperature, which was detected by TLC until completely finished. Then, the mixture was directly purified by flash chromatography (mixture of one tenth Alumina-B and nine tenth silica gel) with an eluent of PE:EtOAc = 30:1 to afford the desired product.

**Table S2.** Influence of solvent on the reaction.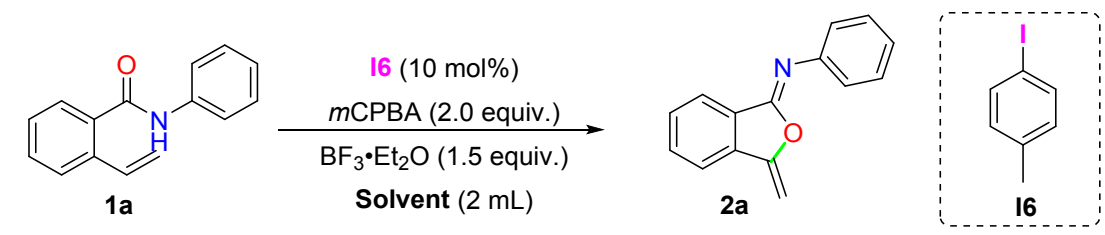

| Entry <sup>a</sup> | Solvent                           | Time   | Temp. (°C) | Yield <sup>b</sup> (%) |
|--------------------|-----------------------------------|--------|------------|------------------------|
| 1                  | HFIP                              | 30 min | 25         | 58                     |
| 2                  | DCM                               | 60 min | 25         | 46                     |
| 3                  | DCE                               | 1 h    | 25         | 34                     |
| 4                  | THF                               | 8 h    | 25         | -                      |
| 5                  | MeCN                              | 30 min | 25         | 88                     |
| 6                  | DMF                               | 1 h    | 25         | 23                     |
| 7                  | <i>i</i> -PrOH                    | 8 h    | 25         | -                      |
| 8                  | $\text{CF}_3\text{CH}_2\text{OH}$ | 8 h    | 25         | -                      |
| 9                  | <i>n</i> -Hexane                  | 8 h    | 25         | -                      |
| 10                 | $\text{C}_7\text{H}_5\text{F}_3$  | 8 h    | 25         | -                      |

<sup>a</sup> Reaction conditions: **1a** (0.2 mmol), **I6** (10 mol%), *m*CPBA (0.4 mmol, 2.0 equiv.),  $\text{BF}_3 \cdot \text{Et}_2\text{O}$  (0.3 mmol, 1.5 equiv.), **Solvent** (2 mL), air atmosphere; <sup>b</sup> Isolated yield.

**Experimental Procedure:** *m*CPBA (86.3 mg, 80%, 0.2 mmol) and **I6** (4.4 mg 0.02 mmol) were weighted into an oven-dried 10 mL Pyrex tube equipped with a magnetic stir bar. **Solvent** (2.0 mL) was added and the reaction mixture was stirred vigorously for 5 min. Then, **1a** (44.6 mg, 0.2 mmol) and  $\text{BF}_3 \cdot \text{Et}_2\text{O}$  (38  $\mu\text{L}$ , 0.3 mmol) was added in turn. The reaction mixture was stirred at room temperature, which was detected by TLC until completely finished. Then, the mixture was directly purified by flash chromatography (mixture of one tenth Alumina-B and nine tenth silica gel) with an eluent of PE:EtOAc = 30:1 to afford the desired product.

**Table S3.** Influence of iodine reagents on the reaction.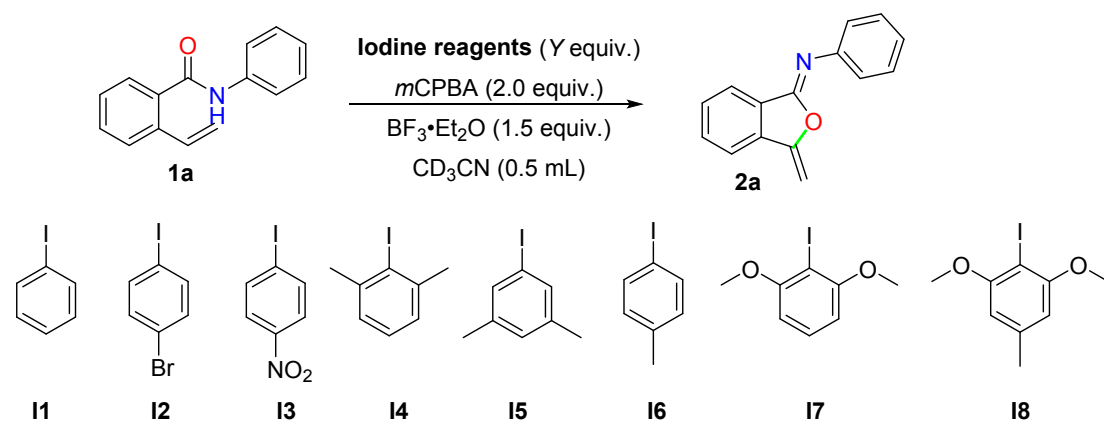

| Entry <sup>a</sup> | ArI reagents   | Equiv (Y) | Time   | Yield <sup>b</sup> (%) |
|--------------------|----------------|-----------|--------|------------------------|
| 1                  | <b>11</b>      | 0.1       | 30 min | 91                     |
| 2                  | <b>12</b>      | 0.1       | 30 min | 81                     |
| 3                  | <b>13</b>      | 0.1       | 30 min | 85                     |
| 4                  | <b>14</b>      | 0.1       | 30 min | 88                     |
| 5                  | <b>15</b>      | 0.1       | 30 min | 89                     |
| 6                  | <b>16</b>      | 0.1       | 30 min | 95                     |
| 7                  | <b>17</b>      | 0.1       | 30 min | 93                     |
| 8                  | <b>18</b>      | 0.1       | 30 min | 95(89)                 |
| 9                  | PIDA           | 1.0       | 30 min | 86(79)                 |
| 10                 | I <sub>2</sub> | 0.1       | 3 h    | 87(78)                 |
| 11                 | KI             | 0.2       | 3 h    | 89(83)                 |
| 12                 | <b>16</b>      | 0         | 30 min | trace                  |
| 13                 | <b>16</b>      | 0.05      | 1 h    | 90(85)                 |
| 14                 | <b>16</b>      | 0.15      | 30 min | 92                     |
| 15                 | <b>16</b>      | 0.2       | 30 min | 91                     |

<sup>a</sup> Reaction conditions: **1a** (0.05 mmol), **ArI reagents**, BF<sub>3</sub>·Et<sub>2</sub>O (0.075 mmol, 1.5 equiv.), *m*CPBA (0.1 mmol, 2.0 equiv.), CD<sub>3</sub>CN (0.5 mL), r.t., air atmosphere; <sup>b</sup> <sup>1</sup>H NMR yield; Isolated yield was given in parentheses.

**Experimental Procedure:** *m*CPBA (21.6 mg, 80%, 0.075 mmol), **ArI reagents** and **1a** (11.2 mg, 0.05 mmol) were weighted into an oven-dried septum-capped NMR tube. CD<sub>3</sub>CN (0.5 mL, with 0.5 μL CH<sub>2</sub>Br<sub>2</sub>/mL) and BF<sub>3</sub>·Et<sub>2</sub>O (10 μL, 0.075 mmol) were added in turn. The reaction mixture was shocked for 5 min. Then, the mixture was placed for 25 minutes for <sup>1</sup>H NMR spectroscopic analyses. Some experiments with low yields will be detected for a prolonged reaction time.

**Table S4.** Influence of oxidant on the reaction.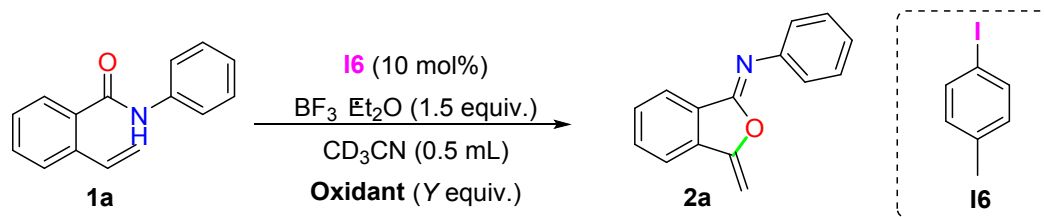

| Entry <sup>a</sup> | Oxidant                | Equiv ( $Y$ ) | Time   | Yield <sup>b</sup> (%) |
|--------------------|------------------------|---------------|--------|------------------------|
| 1                  | <i>m</i> CPBA          | 2             | 30 min | 90                     |
| 2                  | $\text{H}_2\text{O}_2$ | 2             | 3 h    | trace                  |
| 3                  | DTBP                   | 2             | 3 h    | trace                  |
| 4                  | TBHP                   | 2             | 3 h    | trace                  |
| 5                  | TBPB                   | 2             | 3 h    | trace                  |
| 6                  | CHP                    | 2             | 3 h    | trace                  |
| 7                  | Oxone                  | 2             | 3 h    | 25(22)                 |
| 8                  | <i>m</i> CPBA          | 0             | 3 h    | -                      |
| 9                  | <i>m</i> CPBA          | 1.0           | 30 min | 35                     |
| 10                 | <i>m</i> CPBA          | 1.2           | 30 min | 65                     |
| 11                 | <i>m</i> CPBA          | 1.5           | 30 min | 95(90)                 |
| 12                 | <i>m</i> CPBA          | 3.0           | 30 min | 70                     |

<sup>a</sup> Reaction conditions: **1a** (0.05 mmol), **16** (10 mol%), **Oxidant** ( $Y$  equiv.),  $\text{BF}_3 \cdot \text{Et}_2\text{O}$  (0.075 mmol, 1.5 equiv.),  $\text{CD}_3\text{CN}$  (0.5 mL), r.t., air atmosphere; <sup>b</sup>  $^1\text{H}$  NMR yield; Isolated yield was given in parentheses.

**Experimental Procedure:** Oxidant, **16** (1.1 mg 0.005 mmol) and **1a** (11.2 mg, 0.05 mmol) were weighted into an oven-dried septum-capped NMR tube.  $\text{CD}_3\text{CN}$  (0.5 mL, with 0.5  $\mu\text{L}$   $\text{CH}_2\text{Br}_2/\text{mL}$ ) and  $\text{BF}_3 \cdot \text{Et}_2\text{O}$  (10  $\mu\text{L}$ , 0.075 mmol) were added in turn. The reaction mixture was shocked for 5 min. Then, the mixture was placing for 25 minutes, for  $^1\text{H}$  NMR spectroscopic analyses. Some experiments with low yields will be detected for a prolonged reaction time.

### 3. General procedure for the reaction of 2-alkenylbenzamides

#### 4.1 General procedure for the reaction of 1a-1ah (Table 2)

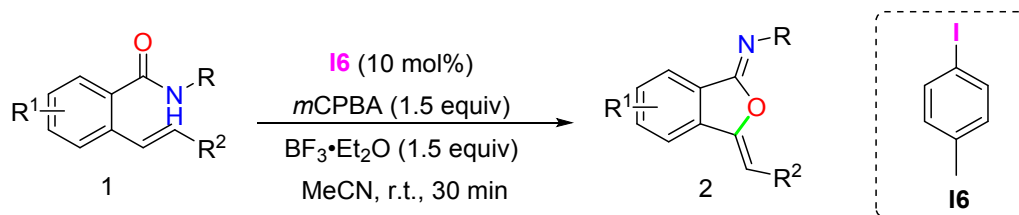

**Experimental Procedure:** *m*CPBA (64.8 mg, 80%, 0.3 mmol) and **I6** (4.4 mg 0.02 mmol) were weighted into an oven-dried 10 mL Pyrex tube equipped with a magnetic stir bar. Dry  $\text{CH}_3\text{CN}$  (2.0 mL) was added and the reaction mixture was stirred vigorously for 5 min. Then, 2-Alkenylbenzamides **1** (0.2 mmol) and  $\text{BF}_3 \cdot \text{Et}_2\text{O}$  (38  $\mu\text{L}$ , 0.3 mmol) was added in turn. The reaction mixture was stirred at room temperature, which was detected by TLC until completely finished. Then, the mixture was directly purified by flash chromatography (mixture of one tenth Alumina-B and nine tenth silica gel) with an eluent of PE:EtOAc = 30:1 to afford the desired product **2**.

#### 4.2 1.0 mmol scale-up reaction of 1a

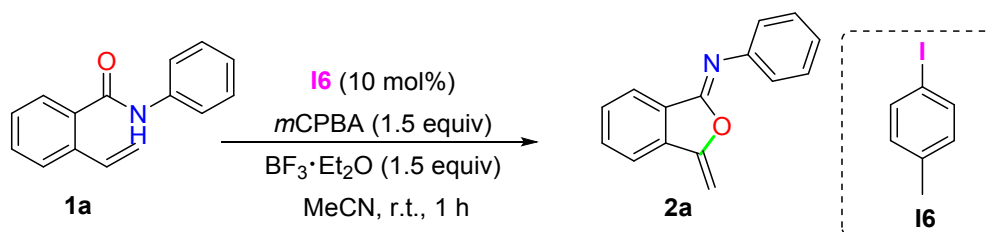

**Experimental Procedure:** *m*CPBA (324 mg, 80%, 1.5 mmol) and **I6** (22 mg 0.1 mmol) were weighted into an oven-dried 100 mL Pyrex tube equipped with a magnetic stir bar. Dry  $\text{CH}_3\text{CN}$  (10.0 mL) was added and the reaction mixture stirred vigorously for 5 min. Then, **1a** (223 mg, 1 mmol) and  $\text{BF}_3 \cdot \text{Et}_2\text{O}$  (189  $\mu\text{L}$ , 1.5 mmol) were added in turn. The reaction mixture was stirred at room temperature, which was detected by TLC until completely finished. Then, the mixture was evaporated to remove the most of the solvent and the residue was purified by flash chromatography (mixture of one tenth Alumina-B and nine tenth silica gel) with an eluent of PE:EtOAc = 30:1 to afford the desired product **2a** as a colorless oil with 82% yield.

### 4.3 General procedure for the reaction of 1ai-1ak (Scheme 2)

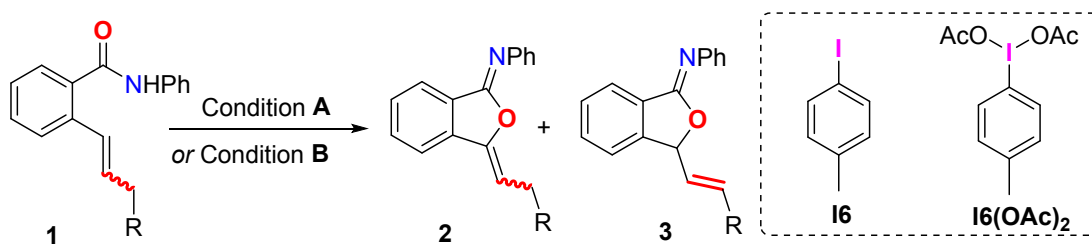

#### Conditions A:

**Experimental Procedure:** *m*CPBA (64.8 mg, 80%, 0.3 mmol) and **I6** (4.4 mg 0.02 mmol) were weighted into an oven-dried 10 mL Pyrex tube equipped with a magnetic stir bar. Dry CH<sub>3</sub>CN (2.0 mL) was added and the reaction mixture was stirred vigorously for 5 min. Then, 2-alkenylbenzamides **1** (0.2 mmol) and BF<sub>3</sub>·Et<sub>2</sub>O (38 μL, 0.3 mmol) were added in turn. The reaction mixture was stirred at room temperature, which was detected by TLC until completely finished. Then, the mixture was directly purified by flash chromatography (mixture of one tenth Alumina-B and nine tenth silica gel) with an eluent of PE:EtOAc = 30:1 to afford the desired product.

#### Conditions B:

**Experimental Procedure:** **I6(OAc)<sub>2</sub>** (80.7 mg 0.24 mmol) were weighted into an oven-dried 10 mL Pyrex tube equipped with a magnetic stir bar. Then, 2-alkenylbenzamides **1** (0.2 mmol), BF<sub>3</sub>·Et<sub>2</sub>O (38 μL, 0.3 mmol) and dry CH<sub>3</sub>CN (2.0 mL) were added in turn. The reaction mixture was stirred at room temperature, which was detected by TLC until completely finished. Then, the mixture was directly purified by flash chromatography (mixture of one tenth Alumina-B and nine tenth silica gel) with an eluent of PE:EtOAc = 30:1 to afford the desired product.

### 4.4 General procedure for the reaction of 1ak (Scheme 3)

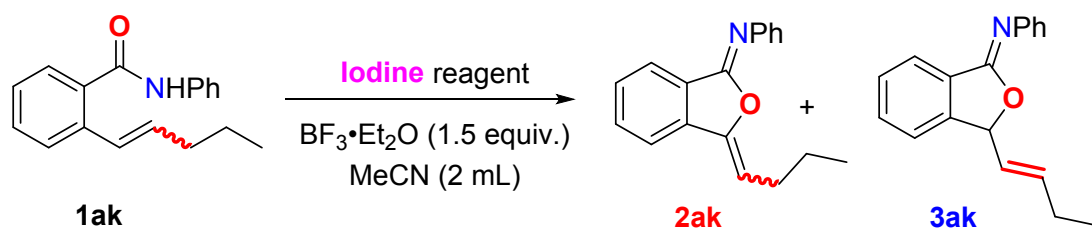

**Experimental Procedure:** An oven-dried 10 mL Pyrex tube equipped with a magnetic stir bar was added the corresponding **iodine reagent** and **mCPBA**, then added CH<sub>3</sub>CN (2.0 mL). After that, 2-alkenylbenzamides **1ak** (53 mg, 0.2 mmol) and BF<sub>3</sub>·Et<sub>2</sub>O (38 μL, 0.3 mmol) was added in turn, and the reaction mixture was stirred at room temperature. The reaction solution was detected by TLC until completely finished. Then, the mixture was directly purified by flash chromatography (mixture of one tenth Alumina-B and nine tenth silica gel) with an eluent of PE:EtOAc = 30:1 to afford the desired product

#### 4.5 Characterization data of products

**(Z)-3-methylene-N-phenylisobenzofuran-1(3H)-imine (2a):**

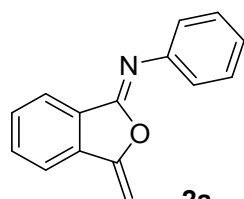

**2a** Colorless oil (39.8 mg, 90%); <sup>1</sup>H NMR (400 MHz, CDCl<sub>3</sub>) δ 7.98 (dt, *J* = 7.6, 1.2 Hz, 1H), 7.68 – 7.58 (m, 1H), 7.58 – 7.48 (m, 1H), 7.45 – 7.31 (m, 3H), 7.16 (tt, *J* = 6.8, 2.0 Hz, 1H), 5.00 (s, 2H); <sup>13</sup>C NMR (100 MHz, CDCl<sub>3</sub>) δ 155.1, 153.9, 145.7, 136.2, 132.2, 130.8, 130.2, 128.8 (2C), 124.7, 123.7 (2C), 123.6, 120.3, 87.2; HRMS: [M+H]<sup>+</sup> calcd for C<sub>15</sub>H<sub>11</sub>NO 222.0913, found 222.0912.

**(Z)-N-(2,6-dimethylphenyl)-3-methyleneisobenzofuran-1(3H)-imine (2b):**

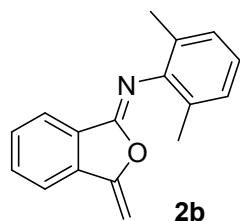

**2b** Colorless oil (41.5 mg, 83%); <sup>1</sup>H NMR (400 MHz, CDCl<sub>3</sub>) δ 8.08 – 8.02 (m, 1H), 7.63 (t, *J* = 8.0 Hz, 2H), 7.60 – 7.53 (m, 1H), 7.08 (d, *J* = 7.4 Hz, 2H), 6.97 (t, *J* = 7.4 Hz, 1H), 4.97 – 4.89 (m, 2H), 2.17 (s, 6H); <sup>13</sup>C NMR (100 MHz, CDCl<sub>3</sub>) δ 154.8, 153.1, 144.6, 136.8, 135.2, 134.5, 132.3, (130.3, 130.2) (1C), (129.7,



129.8) (1C), (128.2, 127.9) (1C), 127.7 (2C), (123.7, 123.5) (1C) 120.36, 87.11, 18.37 (2C); HRMS:  $[M+H]^+$  calcd for  $C_{17}H_{15}NO$  250.1226, found 250.1227.

**(Z)-3-methylene-N-(o-tolyl)isobenzofuran-1(3H)-imine (2c):**

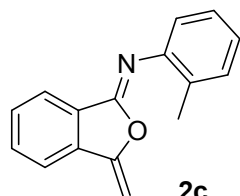

**2c** Colorless oil (37.2 mg, 79%);  $^1H$  NMR (400 MHz,  $CDCl_3$ )  $\delta$  8.00 (d,  $J = 7.6$  Hz, 1H), 7.70 – 7.49 (m, 3H), 7.24 – 7.15 (m, 3H), 7.06 (t,  $J = 7.2$  Hz, 1H), 4.96 (q,  $J = 2.8$  Hz, 2H), 2.28 (s, 3H);  $^{13}C$  NMR (100 MHz,  $CDCl_3$ )  $\delta$  155.0, 153.3, 144.9, 136.5, 132.2, 130.6, 130.4, 130.3, 130.2, 126.1, 124.2, 123.6, 121.7, 120.3, 87.1, 18.2; HRMS:  $[M+H]^+$  calcd for  $C_{16}H_{13}NO$  236.1070, found 236.1072.

**(Z)-3-methylene-N-(m-tolyl)isobenzofuran-1(3H)-imine (2d):**

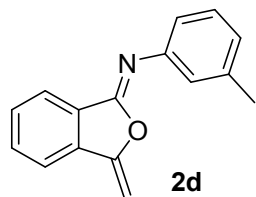

**2d** Colorless oil (37.1 mg, 79%);  $^1H$  NMR (400 MHz,  $CDCl_3$ )  $\delta$  7.97 (d,  $J = 7.6$  Hz, 1H), 7.64 (d,  $J = 7.6$  Hz, 1H), 7.61 – 7.51 (m, 2H), 7.31 – 7.23 (m, 1H), 7.17 (d,  $J = 7.6$  Hz, 2H), 6.98 (d,  $J = 7.6$  Hz, 1H), 4.99 (t,  $J = 2.4$  Hz, 2H), 2.38 (s, 3H);  $^{13}C$  NMR (100 MHz,  $CDCl_3$ )  $\delta$  155.1, 153.7, 145.6, 138.5, 136.2, 132.1, 130.8, 130.1, 128.5, 125.5, 124.2, 123.5, 120.5, 120.2, 87.1, 21.5; HRMS:  $[M+H]^+$  calcd for  $C_{16}H_{13}NO$  236.1070, found 236.1071.

**(Z)-3-methylene-N-(p-tolyl)isobenzofuran-1(3H)-imine (2e):**

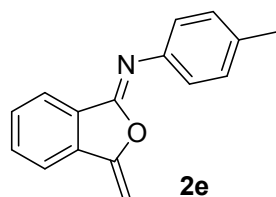

**2e** Colorless oil (38.1 mg, 81%);  $^1H$  NMR (400 MHz,  $CDCl_3$ )  $\delta$  7.98 (d,  $J = 7.6$  Hz, 1H), 7.65 (d,  $J = 7.6$  Hz, 1H), 7.62 – 7.49 (m, 2H), 7.34 – 7.23 (m,

2H), 7.19 (d,  $J = 8.0$  Hz, 2H), 5.00 (q,  $J = 3.2$  Hz, 2H), 2.37 (s, 3H);  $^{13}\text{C}$  NMR (100 MHz,  $\text{CDCl}_3$ )  $\delta$  155.2, 153.5, 142.9, 136.1, 134.4, 132.0, 130.9, 130.1, 129.4 (2C), 123.8 (2C), 123.5, 120.2, 86.9, 21.1; HRMS:  $[\text{M}+\text{H}]^+$  calcd for  $\text{C}_{16}\text{H}_{13}\text{NO}$  236.1070, found 236.1070.

**(Z)-N-(4-methoxyphenyl)-3-methyleneisobenzofuran-1(3H)-imine (2f):**

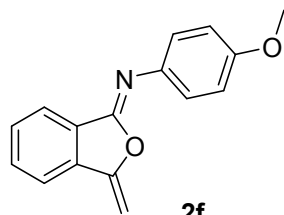

**2f**

White solid (39.2 mg, 78%);  $^1\text{H}$  NMR (400 MHz,  $\text{CDCl}_3$ )  $\delta$  7.96 (dt,  $J = 7.2, 1.2$  Hz, 1H), 7.65 (dt,  $J = 8.0, 1.2$  Hz, 1H), 7.62 – 7.49 (m, 2H), 7.50 – 7.41 (m, 2H), 6.96 – 6.90 (m, 2H), 5.06 – 4.97 (m, 2H), 3.84 (s, 3H);  $^{13}\text{C}$  NMR (100 MHz,  $\text{CDCl}_3$ )  $\delta$  157.0, 155.2, 152.8, 138.5, 135.9, 131.8, 131.2, 130.1, 125.7 (2C), 123.4, 120.2, 114.0 (2C), 86.6, 55.4; HRMS:  $[\text{M}+\text{H}]^+$  calcd for  $\text{C}_{16}\text{H}_{13}\text{NO}_2$  252.1019, found 252.1020.

**(Z)-N-(4-(tert-butyl)phenyl)-3-methyleneisobenzofuran-1(3H)-imine (2g):**

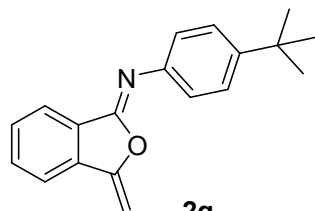

**2g**

White solid (44.0 mg, 79%);  $^1\text{H}$  NMR (400 MHz,  $\text{CDCl}_3$ )  $\delta$  7.98 (dt,  $J = 7.6, 1.2$  Hz, 1H), 7.65 (dt,  $J = 7.6, 1.2$  Hz, 1H), 7.62 – 7.48 (m, 2H), 7.44 – 7.32 (m, 1H), 5.04 – 4.97 (m, 2H), 1.35 (s, 9H);  $^{13}\text{C}$  NMR (100 MHz,  $\text{CDCl}_3$ )  $\delta$  155.2, 153.4, 147.7, 142.8, 136.1, 132.0, 131.0, 130.1, 125.6 (2C), 123.7 (2C), 123.5, 120.2, 86.9, 34.5, 31.5 (3C); HRMS:  $[\text{M}+\text{H}]^+$  calcd for  $\text{C}_{19}\text{H}_{19}\text{NO}$  278.1539, found 278.1537.

**(Z)-N-(4-fluorophenyl)-3-methyleneisobenzofuran-1(3H)-imine (2h):**

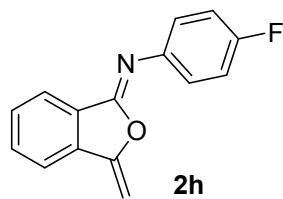

Colorless oil (39.2 mg, 82%);  $^1\text{H}$  NMR (400 MHz,  $\text{CDCl}_3$ )  $\delta$  7.96 (d,  $J = 7.6$  Hz, 1H), 7.65 (d,  $J = 7.6$  Hz, 1H), 7.62 – 7.49 (m, 2H), 7.39 (dd,  $J = 8.8, 5.2$  Hz, 2H), 7.06 (t,  $J = 8.8$  Hz, 2H), 5.02 (s, 2H);  $^{13}\text{C}$  NMR (100 MHz,  $\text{CDCl}_3$ )  $\delta$  161.3, 158.9, 155.1, 153.8 (d,  $J_{\text{CF}} = 1.6$  Hz), 141.5 (d,  $J_{\text{CF}} = 3.0$  Hz), 136.1, 132.2, 130.7, 130.2, 125.5 (d,  $J_{\text{CF}} = 8.0$  Hz), 123.5, 120.3, 115.5, 115.3, 87.2;  $^{19}\text{F}$  NMR (376 MHz,  $\text{CDCl}_3$ )  $\delta$  -118.1; HRMS:  $[\text{M}+\text{H}]^+$  calcd for  $\text{C}_{15}\text{H}_{10}\text{FNO}$  240.0819, found 240.0823.

**(Z)-N-(2-chlorophenyl)-3-methyleneisobenzofuran-1(3H)-imine (2i):**

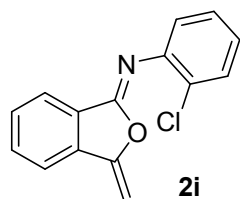

Colorless oil (42.3 mg, 83%);  $^1\text{H}$  NMR (400 MHz,  $\text{CDCl}_3$ )  $\delta$  8.04 (d,  $J = 7.6$  Hz, 1H), 7.65 (q,  $J = 8.0$  Hz, 2H), 7.58 (t,  $J = 7.6$  Hz, 1H), 7.44 (d,  $J = 8.0$  Hz, 1H), 7.26 (d,  $J = 3.6$  Hz, 2H), 7.13 – 7.03 (m, 1H), 5.05 – 4.97 (m, 2H);  $^{13}\text{C}$  NMR (100 MHz,  $\text{CDCl}_3$ )  $\delta$  155.2, 154.9, 143.8, 136.6, 132.6, 130.3, 130.0, 129.7, 127.0, 127.0, 125.0, 123.9, 123.5, 120.3, 87.8; HRMS:  $[\text{M}+\text{H}]^+$  calcd for  $\text{C}_{15}\text{H}_{10}\text{ClNO}$  256.0524, found 256.0521.

**(Z)-N-(3-chlorophenyl)-3-methyleneisobenzofuran-1(3H)-imine (2j):**

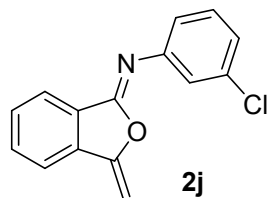

Colorless oil (42.3 mg, 83%);  $^1\text{H}$  NMR (400 MHz,  $\text{CDCl}_3$ )  $\delta$  7.96 (d,  $J = 7.6$  Hz, 1H), 7.69 – 7.51 (m, 3H), 7.37 (t,  $J = 2.0$  Hz, 1H), 7.29 (t,  $J = 8.0$  Hz, 1H), 7.22 (dt,  $J = 8.0, 1.2$  Hz, 1H), 7.13 (dt,  $J = 8.0, 1.6$  Hz, 1H), 5.05 (d,  $J = 3.6$  Hz, 2H);  $^{13}\text{C}$  NMR (100 MHz,  $\text{CDCl}_3$ )  $\delta$  154.9, 154.6, 147.0, 136.3, 134.2, 132.5,

130.4, 130.3, 129.7, 124.7, 123.8, 123.6, 122.0, 120.3, 87.8; HRMS:  $[M+H]^+$  calcd for  $C_{15}H_{10}ClNO$  256.0524, found 256.0523.

**(Z)-N-(4-chlorophenyl)-3-methyleneisobenzofuran-1(3H)-imine (2k):**

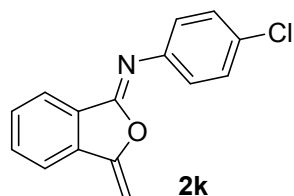

**2k** White solid (44.9 mg, 88%);  $^1H$  NMR (400 MHz,  $CDCl_3$ )  $\delta$  7.94 (d,  $J = 7.6$ , 1H), 7.67 – 7.49 (m, 3H), 7.32 (s, 4H), 5.02 (s, 2H);  $^{13}C$  NMR (100 MHz,  $CDCl_3$ )  $\delta$  155.0, 154.2, 144.2, 136.2, 132.3, 130.6, 130.3, 130.0, 128.8 (2C), 125.3 (2C), 123.6, 120.3, 87.5; HRMS:  $[M+H]^+$  calcd for  $C_{15}H_{10}ClNO$  256.0524, found 256.0524.

**(Z)-N-(4-bromophenyl)-3-methyleneisobenzofuran-1(3H)-imine (2l):**

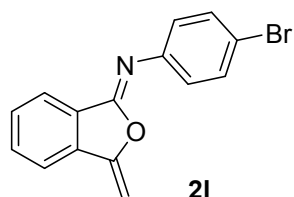

**2l** White solid (50.7 mg, 85%);  $^1H$  NMR (400 MHz,  $CDCl_3$ )  $\delta$  7.88 (d,  $J = 7.6$  Hz, 1H), 7.62 – 7.51 (m, 2H), 7.48 (td,  $J = 7.6, 1.2$  Hz, 1H), 7.45 – 7.37 (m, 2H), 7.21 – 7.15 (m, 2H), 4.96 (s, 2H);  $^{13}C$  NMR (100 MHz,  $CDCl_3$ )  $\delta$  155.0, 154.3, 144.7, 136.2, 132.4 (2C), 130.3, 129.7, 127.7, 125.6 (2C), 123.6, 120.3, 117.8, 87.6; HRMS:  $[M+H]^+$  calcd for  $C_{15}H_{10}BrNO$  300.0019, found 300.0017.

**(Z)-3-methylene-N-(4-nitrophenyl)isobenzofuran-1(3H)-imine (2m):**

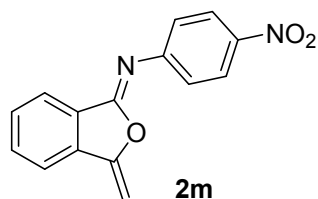

**2m** Light yellow solid (47.4 mg, 88%);  $^1H$  NMR (400 MHz,  $CDCl_3$ )  $\delta$  8.25 (d,  $J = 8.8$  Hz, 2H), 7.98 (d,  $J = 7.6$  Hz, 1H), 7.68 (q,  $J = 8.0$  Hz, 2H),

7.59 (t,  $J = 7.6$  Hz, 1H), 7.38 (d,  $J = 8.8$  Hz, 2H), 5.14 – 5.04 (m, 2H);  $^{13}\text{C}$  NMR (100 MHz,  $\text{CDCl}_3$ )  $\delta$  155.6, 154.8, 152.4, 144.3, 136.4, 133.0 (2C), 130.5, 129.9, 124.7 (2C), 123.9, 123.8, 120.5, 88.7; HRMS:  $[\text{M}+\text{H}]^+$  calcd for  $\text{C}_{15}\text{H}_{10}\text{N}_2\text{O}_3$  267.0764, found 267.0762.

**(Z)-3-methylene-N-(4-(trifluoromethyl)phenyl)isobenzofuran-1(3H)-imine (2n):**

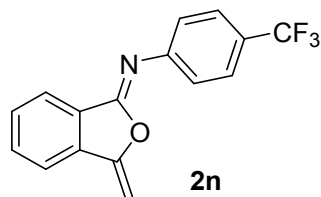

White solid (52.0 mg, 90%);  $^1\text{H}$  NMR (400 MHz,  $\text{CDCl}_3$ )  $\delta$  7.98 (d,  $J = 7.6$  Hz, 1H), 7.64 (dd,  $J = 12.4, 6.4$  Hz, 4H), 7.59 – 7.55 (m, 1H), 7.38 (d,  $J = 8.4$  Hz, 2H), 5.08 – 5.00 (m, 2H);  $^{13}\text{C}$  NMR (100 MHz,  $\text{CDCl}_3$ )  $\delta$  154.9 (d,  $J_{\text{CF}} = 5.9$  Hz), 149.1, 136.4, 132.6, 130.3 (d,  $J_{\text{CF}} = 8.9$  Hz), 126.3 (q,  $J_{\text{CF}} = 271.1$  Hz), 125.9 (q,  $J_{\text{CF}} = 29.6$  Hz), 123.7, 123.5, 120.4, 88.0;  $^{19}\text{F}$  NMR (376 MHz,  $\text{CDCl}_3$ )  $\delta$  -62.21; HRMS:  $[\text{M}+\text{H}]^+$  calcd for  $\text{C}_{16}\text{H}_{10}\text{F}_3\text{NO}$  290.0787, found 290.7881.

**(Z)-3-methylene-N-(naphthalen-1-yl)isobenzofuran-1(3H)-imine (2o):**

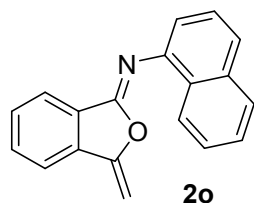

White solid (47.7 mg, 88%);  $^1\text{H}$  NMR (400 MHz,  $\text{CDCl}_3$ )  $\delta$  8.30 – 8.23 (m, 1H), 8.13 (d,  $J = 7.2$  Hz, 1H), 7.74 – 7.54 (m, 5H), 7.47 (dq,  $J = 12.0, 7.6, 6.4$  Hz, 4H), 5.05 – 4.87 (m, 2H);  $^{13}\text{C}$  NMR (100 MHz,  $\text{CDCl}_3$ )  $\delta$  155.1, 154.3, 142.2, 136.5, 134.2, 132.3, 130.7, 130.2, 128.7, 127.8, 126.0, 125.8, 125.5, 124.5, 124.1, 123.7, 120.3, 117.7, 87.4; HRMS:  $[\text{M}+\text{H}]^+$  calcd for  $\text{C}_{19}\text{H}_{13}\text{NO}$  272.1070, found 272.1067.

**(Z)-N-cyclohexyl-3-methyleneisobenzofuran-1(3H)-imine (2p):**

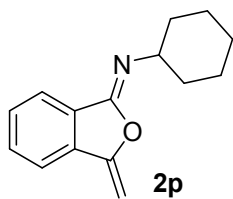

**2p** Colorless oil (35.4 mg, 78%);  $^1\text{H}$  NMR (400 MHz,  $\text{CDCl}_3$ )  $\delta$  7.86 (d,  $J = 7.2$  Hz, 1H), 7.63 – 7.44 (m, 1H), 7.44 (d,  $J = 1.2$  Hz, 2H), 4.95 – 4.86 (m, 2H), 3.90 (tt,  $J = 10.4, 4.0$  Hz, 1H), 1.90 – 1.76 (m, 3H), 1.73 – 1.63 (m, 1H), 1.54 – 1.33 (m, 5H), 1.26 (ddt,  $J = 12.8, 7.6, 3.6$  Hz, 1H);  $^{13}\text{C}$  NMR (100 MHz,  $\text{CDCl}_3$ )  $\delta$  155.1, 153.3, 136.4, 131.3, 130.7, 129.8, 123.1, 120.1, 84.8, 56.2, 34.0 (2C), 25.8, 25.0 (2C); HRMS:  $[\text{M}+\text{H}]^+$  calcd for  $\text{C}_{15}\text{H}_{17}\text{NO}$  228.1383, found 228.1382.

**(Z)-3-methylene-N-neopentylisobenzofuran-1(3H)-imine (2q):**

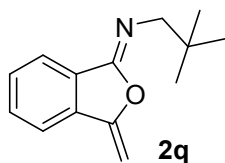

**2q** Colorless oil (32.3 mg, 75%);  $^1\text{H}$  NMR (400 MHz,  $\text{CDCl}_3$ )  $\delta$  7.84 (dt,  $J = 7.6, 1.2$  Hz, 1H), 7.59 (dt,  $J = 7.6, 1.2$  Hz, 1H), 7.55 – 7.43 (m, 2H), 5.00 – 4.78 (m, 2H), 3.39 (s, 2H), 1.01 (s, 9H);  $^{13}\text{C}$  NMR (100 MHz,  $\text{CDCl}_3$ )  $\delta$  155.1, 154.0, 136.4, 131.2, 130.8, 129.8, 123.0, 120.1, 84.7, 59.6, 32.3, 27.8 (3C); HRMS:  $[\text{M}+\text{H}]^+$  calcd for  $\text{C}_{14}\text{H}_{17}\text{NO}$  216.1383, found 216.1385.

**(Z)-N-benzyl-3-methyleneisobenzofuran-1(3H)-imine (2r).**

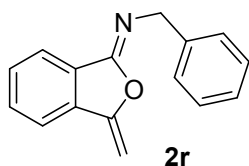

**2r** White solid (37.6 mg, 78%);  $^1\text{H}$  NMR (400 MHz,  $\text{CDCl}_3$ );  $\delta$  7.93 (d,  $J = 7.6$  Hz, 1H), 7.64 (d,  $J = 7.6$  Hz, 1H), 7.57 (t,  $J = 7.2$  Hz, 1H), 7.54 – 7.46 (m, 3H), 7.39 (t,  $J = 7.6$  Hz, 2H), 7.32 – 7.28 (m, 1H), 5.06 – 4.96 (m, 2H), 4.90 (s, 2H);  $^{13}\text{C}$  NMR (100 MHz,  $\text{CDCl}_3$ )  $\delta$  155.4, 155.0, 140.2, 136.5, 131.6, 130.5, 130.0, 128.4 (2C), 127.9 (2C), 126.7, 123.2, 120.2, 85.7, 51.7; HRMS:  $[\text{M}+\text{H}]^+$  calcd for  $\text{C}_{16}\text{H}_{13}\text{NO}$  236.1070, found 236.1077.

**(Z)-6-methyl-3-methylene-N-phenylisobenzofuran-1(3H)-imine (2s):**

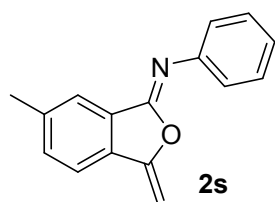

**2s** Colorless oil (37.6 mg, 80%);  $^1\text{H}$  NMR (400 MHz,  $\text{CDCl}_3$ )  $\delta$  7.78 (s, 1H), 7.52 (d,  $J = 8.0$  Hz, 1H), 7.37 (d,  $J = 5.6$  Hz, 5H), 7.15 (tt,  $J = 6.4, 2.4$  Hz, 1H), 4.93 (q,  $J = 2.8$  Hz, 2H), 2.47 (s, 3H);  $^{13}\text{C}$  NMR (100 MHz,  $\text{CDCl}_3$ )  $\delta$  155.2, 154.0, 145.7, 140.7, 133.8, 133.4, 131.1, 128.7(2C), 124.6, 123.7 (2C), 123.6, 120.1, 86.3, 21.6; HRMS:  $[\text{M}+\text{H}]^+$  calcd for  $\text{C}_{16}\text{H}_{13}\text{NO}$  236.1070, found 236.1071.

**(Z)-6-chloro-3-methylene-N-phenylisobenzofuran-1(3H)-imine (2t):**

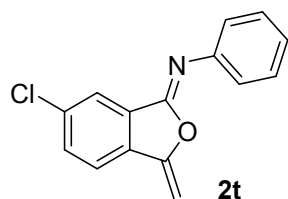

**2t** White solid (45.4 mg, 89%);  $^1\text{H}$  NMR (400 MHz,  $\text{CDCl}_3$ )  $\delta$  7.94 (d,  $J = 1.6$  Hz, 1H), 7.53 (s, 2H), 7.37 (d,  $J = 4.4$  Hz, 4H), 7.17 (tt,  $J = 5.4, 3.6$  Hz, 1H), 5.01 (d,  $J = 3.2$  Hz, 1H), 4.97 (d,  $J = 3.2$  Hz, 1H);  $^{13}\text{C}$  NMR (100 MHz,  $\text{CDCl}_3$ )  $\delta$  154.4, 152.3, 145.1, 136.4, 134.5, 132.5, 132.5, 128.8 (2C), 125.1, 123.9 (2C), 123.6, 121.5, 87.8; HRMS:  $[\text{M}+\text{H}]^+$  calcd for  $\text{C}_{15}\text{H}_{10}\text{ClNO}$  256.0524, found 256.0523.

**(Z)-3-methylene-6-nitro-N-phenylisobenzofuran-1(3H)-imine (2u):**

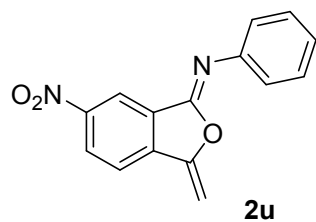

**2u** Light yellow solid (47.9 mg, 90%);  $^1\text{H}$  NMR (400 MHz,  $\text{CDCl}_3$ )  $\delta$  8.77 (d,  $J = 2.0$  Hz, 1H), 8.39 (dd,  $J = 8.4, 2.0$  Hz, 1H), 7.74 (d,  $J = 8.4$  Hz, 1H), 7.34 (d,  $J = 4.8$  Hz, 4H), 7.15 (ddd,  $J = 8.4, 5.2, 3.6$  Hz, 1H), 5.20 – 5.12 (m, 2H);  $^{13}\text{C}$  NMR (100 MHz,  $\text{CDCl}_3$ )  $\delta$  153.7, 151.1, 149.4, 144.5, 140.7, 132.4, 128.9 (2C), 127.1, 125.6, 124.0 (2C), 121.4, 119.6, 91.2; HRMS:  $[\text{M}+\text{H}]^+$  calcd for  $\text{C}_{15}\text{H}_{10}\text{N}_2\text{O}_3$

267.0764, found 267.0764.

**(Z)-5-methyl-3-methylene-N-phenylisobenzofuran-1(3H)-imine (2v):**

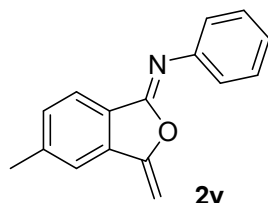

Colorless oil (38.0 mg, 81%);  $^1\text{H}$  NMR (400 MHz,  $\text{CDCl}_3$ )  $\delta$  7.86 (d,  $J = 8.0$  Hz, 1H), 7.44 (s, 1H), 7.42 – 7.31 (m, 5H), 7.15 (td,  $J = 6.8, 2.0$  Hz, 1H), 4.97 (s, 2H), 2.49 (s, 3H);  $^{13}\text{C}$  NMR (100 MHz,  $\text{CDCl}_3$ )  $\delta$  155.1, 154.0, 145.8, 143.0, 136.6, 131.5, 128.7 (2C), 128.3, 124.5 (2C), 123.7, 123.3, 120.4, 86.8, 21.9; HRMS:  $[\text{M}+\text{H}]^+$  calcd for  $\text{C}_{16}\text{H}_{13}\text{NO}$  236.1070, found 236.1071.

**(Z)-5-fluoro-3-methylene-N-phenylisobenzofuran-1(3H)-imine (2w):**

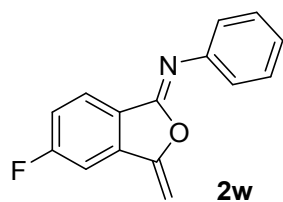

Colorless oil (41.1 mg, 87%);  $^1\text{H}$  NMR (400 MHz,  $\text{CDCl}_3$ )  $\delta$  7.95 (dd,  $J = 8.4, 4.8$  Hz, 1H), 7.42 – 7.31 (m, 4H), 7.26 (ddd,  $J = 10.8, 6.8, 2.4$  Hz, 3H), 7.16 (t,  $J = 6.8$  Hz, 1H), 5.04 (d,  $J = 3.2$  Hz, 1H), 4.98 (d,  $J = 3.2$  Hz, 1H);  $^{13}\text{C}$  NMR (100 MHz,  $\text{CDCl}_3$ )  $\delta$  166.7, 164.2, 154.1 (d,  $J_{\text{CF}} = 4.4$  Hz), 152.7, 145.4, 138.4 (d,  $J_{\text{CF}} = 10.3$  Hz), 128.8 (2C), 125.9 (d,  $J_{\text{CF}} = 9.8$  Hz), 124.8, 123.7 (2C), 118.5 (d,  $J_{\text{CF}} = 24.2$  Hz), 107.0 (d,  $J_{\text{CF}} = 24.6$  Hz), 88.4;  $^{19}\text{F}$  NMR (376 MHz,  $\text{CDCl}_3$ )  $\delta$  -106.2; HRMS:  $[\text{M}+\text{H}]^+$  calcd for  $\text{C}_{15}\text{H}_{10}\text{FNO}$  240.0819, found 240.0819.

**(Z)-5-chloro-3-methylene-N-phenylisobenzofuran-1(3H)-imine (2x).**

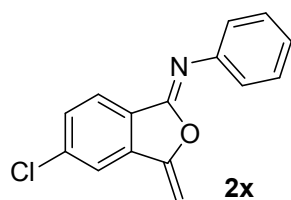

White solid (45.4 mg, 89%);  $^1\text{H}$  NMR (400 MHz,  $\text{CDCl}_3$ )  $\delta$



7.88 (d,  $J = 8.4$  Hz, 1H), 7.59 (s, 1H), 7.48 (d,  $J = 8.0$ , 1H), 7.37 (d,  $J = 6.4$  Hz, 4H), 7.16 (tq,  $J = 6.4, 4.0, 3.2$  Hz, 1H), 5.03 (d,  $J = 3.2$  Hz, 1H), 4.98 (d,  $J = 3.2$  Hz, 1H);  $^{13}\text{C}$  NMR (100 MHz,  $\text{CDCl}_3$ )  $\delta$  153.9, 152.7, 145.3, 138.6, 137.7, 130.7, 129.3, 128.8 (2C), 125.0, 124.8, 123.8 (2C), 120.5, 88.4; HRMS:  $[\text{M}+\text{H}]^+$  calcd for  $\text{C}_{15}\text{H}_{10}\text{ClNO}$  256.0524, found 256.0524.

**(Z)-3-methylene-5-nitro-*N*-phenylisobenzofuran-1(3*H*)-imine (2y):**

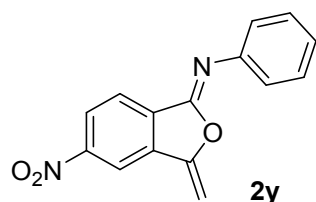

**2y** Light yellow solid (47.3 mg, 89%);  $^1\text{H}$  NMR (400 MHz,  $\text{CDCl}_3$ )  $\delta$  8.49 (d,  $J = 2.0$  Hz, 1H), 8.39 (dd,  $J = 8.4, 2.0$  Hz, 1H), 8.13 (d,  $J = 8.4$  Hz, 1H), 7.46 – 7.36 (m, 4H), 7.22 (tt,  $J = 6.0, 2.4$  Hz, 1H), 5.19 (s, 2H);  $^{13}\text{C}$  NMR (100 MHz,  $\text{CDCl}_3$ )  $\delta$  153.5, 151.3, 150.6, 144.6, 137.0, 135.8, 128.9 (2C), 125.7, 125.2, 124.9, 124.1 (2C), 116.1, 89.8; HRMS:  $[\text{M}+\text{H}]^+$  calcd for  $\text{C}_{15}\text{H}_{10}\text{N}_2\text{O}_3$  267.0764, found 267.0763.

**(Z)-1-methylene-*N*-phenylnaphtho[1,2-*c*]furan-3(1*H*)-imine (2z):**

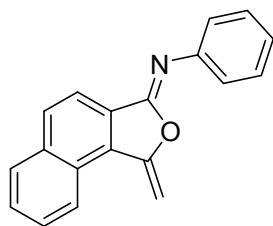

**2z** White solid (47.7 mg, 88%);  $^1\text{H}$  NMR (400 MHz,  $\text{CDCl}_3$ )  $\delta$  8.27 (d,  $J = 8.0$  Hz, 1H), 8.03 – 7.95 (m, 3H), 7.72 – 7.57 (m, 2H), 7.47 – 7.35 (m, 4H), 7.22-7.13 (m, 1H), 5.45 (d,  $J = 3.2$  Hz, 1H), 5.32 (d,  $J = 3.6$  Hz, 1H);  $^{13}\text{C}$  NMR (100 MHz,  $\text{CDCl}_3$ )  $\delta$  155.8, 154.1, 145.8, 135.7, 132.1, 131.8, 130.8, 129.7, 128.8 (2C), 128.3, 127.8, 127.0, 124.7, 124.0 (2C), 123.7, 119.5, 92.2; HRMS:  $[\text{M}+\text{H}]^+$  calcd for  $\text{C}_{19}\text{H}_{13}\text{NO}$  272.1070, found 272.1271.

**(Z)-7-methyl-3-methylene-*N*-phenylisobenzofuran-1(3*H*)-imine (2aa):**

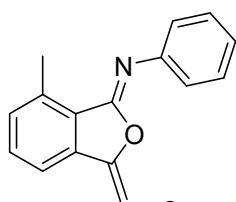

**2aa** Colorless oil (32.0 mg, 68%);  $^1\text{H}$  NMR (400 MHz,  $\text{CDCl}_3$ )  $\delta$  7.45 (q,  $J = 8.0$  Hz, 2H), 7.36 (d,  $J = 7.2$  Hz, 2H), 7.30 (d,  $J = 8.0$  Hz, 3H), 7.14 (t,  $J = 7.2$  Hz, 1H), 4.95 – 4.90 (m, 2H), 2.78 (s, 3H);  $^{13}\text{C}$  NMR (100 MHz,  $\text{CDCl}_3$ )  $\delta$  154.9, 154.2, 146.3, 137.8, 136.7, 132.0, 131.6, 128.7 (2C), 127.9, 124.3, 123.4 (2C), 117.6, 86.1, 18.6; HRMS:  $[\text{M}+\text{H}]^+$  calcd for  $\text{C}_{16}\text{H}_{13}\text{NO}$  236.1070, found 236.1071.

**(Z)-4-methyl-3-methylene-N-phenylisobenzofuran-1(3H)-imine (2ab):**

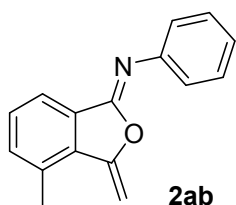

**2ab** Colorless oil (37.6 mg, 80%);  $^1\text{H}$  NMR (400 MHz,  $\text{CDCl}_3$ )  $\delta$  7.84 (d,  $J = 7.6$  Hz, 1H), 7.42 (t,  $J = 7.6$  Hz, 1H), 7.37 (d,  $J = 5.6$  Hz, 5H), 7.15 (tt,  $J = 6.0$ , 2.8 Hz, 1H), 5.12 (d,  $J = 3.2$  Hz, 1H), 4.97 (d,  $J = 3.2$  Hz, 1H), 2.52 (s, 3H);  $^{13}\text{C}$  NMR (100 MHz,  $\text{CDCl}_3$ )  $\delta$  155.7, 154.1, 145.9, 134.1, 133.8, 133.5, 131.6, 130.0, 128.7 (2C), 124.5, 123.7 (2C), 121.4, 91.3, 20.0; HRMS:  $[\text{M}+\text{H}]^+$  calcd for  $\text{C}_{16}\text{H}_{13}\text{NO}$  236.1070, found 236.1072.

**(Z)-3-((Z)-benzylidene)-N-phenylisobenzofuran-1(3H)-imine (2ac):**

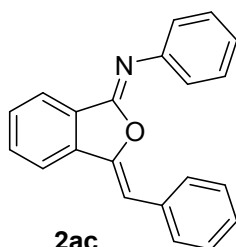

**2ac** White solid (35.6 mg, 60%);  $^1\text{H}$  NMR (400 MHz,  $\text{CDCl}_3$ )  $\delta$  8.39 (d,  $J = 8.0$  Hz, 1H), 7.63 – 7.50 (m, 3H), 7.42 (q,  $J = 8.8$ , 7.6 Hz, 3H), 7.34 (d,  $J = 6.4$  Hz, 4H), 7.26 (s, 2H), 7.14 (q,  $J = 7.6$  Hz, 1H), 6.73 (d,  $J = 8.0$  Hz, 1H);  $^{13}\text{C}$  NMR (100 MHz,  $\text{CDCl}_3$ )  $\delta$  151.7, 149.8, 146.8, 134.0, 132.5, 132.4, 129.5, 128.8 (2C), 128.7 (2C), 128.2, 127.5, 125.7, 124.6 (2C), 123.7, 123.6, 122.4 (2C), 100.9; HRMS:

$[M+H]^+$  calcd for  $C_{21}H_{15}NO$  298.1226, found 298.1228.

**(Z)-3-((Z)-benzylidene)-N-(p-tolyl)isobenzofuran-1(3H)-imine (2ad):**

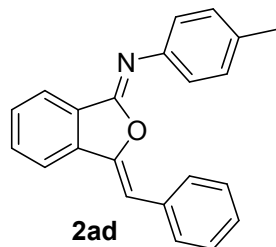

White solid (39.8 mg, 64%);  $^1H$  NMR (400 MHz,  $CDCl_3$ )  $\delta$  8.38 (d,  $J = 8.0$  Hz, 1H), 7.63 (dd,  $J = 6.8, 3.2$  Hz, 2H), 7.54 (t,  $J = 7.6$  Hz, 1H), 7.46 – 7.39 (m, 1H), 7.39 – 7.29 (m, 4H), 7.20 (s, 4H), 6.72 (s, 1H), 2.39 (s, 3H);  $^{13}C$  NMR (100 MHz,  $CDCl_3$ )  $\delta$  151.8, 149.4, 143.8, 133.9, 133.1, 132.5, 132.3, 129.4, 129.3 (2C), 128.7 (2C), 128.1, 127.5, 125.6, 124.7 (2C), 124.0, 122.6 (2C), 100.9, 21.1; HRMS:  $[M+H]^+$  calcd for  $C_{22}H_{17}NO$  312.1383, found 312.1379.

**(Z)-3-((Z)-benzylidene)-N-(4-chlorophenyl)isobenzofuran-1(3H)-imine (2ae):**

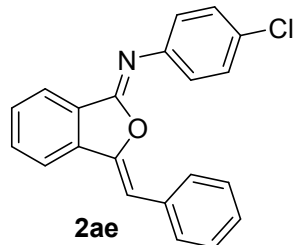

White solid (43.7 mg, 66%);  $^1H$  NMR (400 MHz,  $CDCl_3$ )  $\delta$  8.36 (d,  $J = 8.0$  Hz, 1H), 7.62 – 7.55 (m, 3H), 7.44 (d,  $J = 7.6$  Hz, 1H), 7.36 (t,  $J = 7.2$  Hz, 6H), 7.20 (d,  $J = 8.6$  Hz, 2H), 6.75 (s, 1H);  $^{13}C$  NMR (100 MHz,  $CDCl_3$ )  $\delta$  151.7, 150.2, 145.3, 134.0, 132.7, 132.2, 129.6, 128.8 (2C), 128.8 (2C), 128.6, 128.3, 127.5, 125.7, 124.6 (2C), 123.9 (2C), 123.5, 101.1; HRMS:  $[M+H]^+$  calcd for  $C_{21}H_{14}ClNO$ : 332.0837, found 332.0838.

**(Z)-3-((Z)-4-methylbenzylidene)-N-phenylisobenzofuran-1(3H)-imine (2af):**

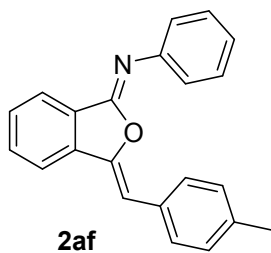

White solid (40.4 mg, 65%);  $^1\text{H}$  NMR (400 MHz,  $\text{CDCl}_3$ )  $\delta$  8.37 (d,  $J = 8.0$  Hz, 1H), 7.55 (d,  $J = 8.4$  Hz, 1H), 7.47 (d,  $J = 8.4$  Hz, 2H), 7.43 – 7.35 (m, 4H), 7.32 (d,  $J = 8.0$  Hz, 1H), 7.24 (s, 1H), 7.14 (d,  $J = 8.0$  Hz, 3H), 6.67 (s, 1H), 2.34 (s, 3H);  $^{13}\text{C}$  NMR (100 MHz,  $\text{CDCl}_3$ )  $\delta$  151.9, 149.9, 146.9, 139.7, 134.2, 132.4, 129.6, 129.4 (2C), 128.7 (2C), 128.0, 127.5, 125.5, 124.6 (2C), 123.6 (2C), 122.5 (2C), 100.1, 21.3; HRMS:  $[\text{M}+\text{H}]^+$  calcd for  $\text{C}_{22}\text{H}_{17}\text{NO}$  312.1383, found 312.1378.

**(Z)-3-((Z)-4-chlorobenzylidene)-N-phenylisobenzofuran-1(3H)-imine (2ag):**

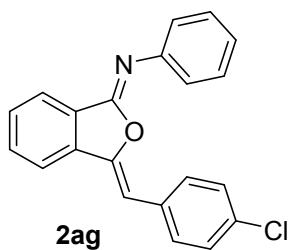

White solid (46.3 mg, 70%);  $^1\text{H}$  NMR (400 MHz,  $\text{CDCl}_3$ )  $\delta$  8.37 (d,  $J = 8.0$  Hz, 1H), 7.55 (t,  $J = 7.2$ , 1H), 7.49 (d,  $J = 8.8$  Hz, 2H), 7.41 (dt,  $J = 15.6, 8.0$  Hz, 3H), 7.31 (t,  $J = 9.6$  Hz, 3H), 7.22 (d,  $J = 7.6$  Hz, 2H), 7.14 (t,  $J = 7.6$  Hz, 1H), 6.69 (s, 1H);  $^{13}\text{C}$  NMR (100 MHz,  $\text{CDCl}_3$ )  $\delta$  150.6, 149.5, 146.7, 135.4, 133.7, 132.5, 130.8, 129.5, 128.9 (2C), 128.8 (2C), 128.4, 127.6, 125.9 (2C), 125.7, 123.7, 122.3 (2C), 101.2; HRMS:  $[\text{M}+\text{H}]^+$  calcd for  $\text{C}_{21}\text{H}_{14}\text{ClNO}$  332.0837, found 332.0838.

**(1Z)-3-ethylidene-N-phenylisobenzofuran-1(3H)-imine (2ai):**

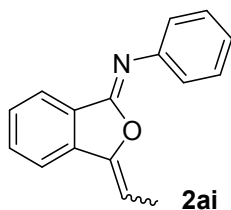

A mixture of inseparable *cis-trans* isomerism ( $Z:E \approx 5.8:1$ );

Colorless oil; Major isomer shown:  $^1\text{H}$  NMR (400 MHz,  $\text{CDCl}_3$ )  $\delta$  7.95 (d,  $J = 7.6$  Hz, 1H), 7.52 (d,  $J = 3.2$  Hz, 2H), 7.46 (d,  $J = 8.0$  Hz, 3H), 7.39 (d,  $J = 7.6$  Hz, 2H), 7.15 (t,  $J = 7.6$  Hz, 1H), 5.43 (q,  $J = 7.2$  Hz, 1H), 1.92 (d,  $J = 7.2$  Hz, 3H);  $^{13}\text{C}$  NMR (100 MHz,  $\text{CDCl}_3$ )  $\delta$  154.1, 149.6, 145.8, 136.6, 132.0, 130.2, 129.1, 128.7 (2C), 124.6, 124.2 (2C), 123.8, 119.2, 99.6, 11.1; HRMS:  $[\text{M}+\text{H}]^+$  calcd for  $\text{C}_{16}\text{H}_{13}\text{NO}$  236.1070, found 236.1071.

**(1Z,3Z)-N-phenyl-3-propylideneisobenzofuran-1(3H)-imine (2aj):**

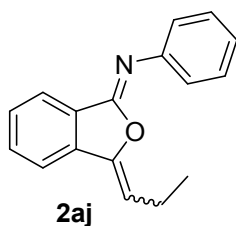

A mixture of inseparable *cis-trans* isomerism ( $Z:E \approx 6.3:1$ ); Colorless oil; Major isomer shown:  $^1\text{H}$  NMR (400 MHz,  $\text{CDCl}_3$ )  $\delta$  7.97 (d,  $J = 8.0$  Hz, 1H), 7.56 (d,  $J = 5.6$  Hz, 2H), 7.47 (dd,  $J = 15.2, 7.6$  Hz, 3H), 7.41 – 7.36 (m, 2H), 7.16 (t,  $J = 7.2$  Hz, 1H), 5.41 (d,  $J = 7.6$  Hz, 1H), 2.41 (p,  $J = 7.6$  Hz, 2H), 1.12 (t,  $J = 7.6$  Hz, 3H);  $^{13}\text{C}$  NMR (100 MHz,  $\text{CDCl}_3$ )  $\delta$  154.2, 148.4, 145.7, 136.7, 132.0, 130.2, 129.1, 128.7 (2C), 124.5, 124.2 (2C), 123.6, 119.3, 106.7, 19.2, 14.1; HRMS:  $[\text{M}+\text{H}]^+$  calcd for  $\text{C}_{17}\text{H}_{15}\text{NO}$  250.1226, found 250.1226.

**(Z)-N-phenyl-3-((Z)-prop-1-en-1-yl)isobenzofuran-1(3H)-imine (3aj):**

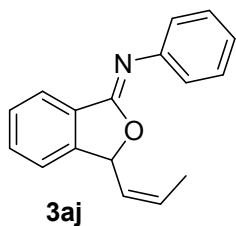

Colorless oil;  $^1\text{H}$  NMR (400 MHz,  $\text{CDCl}_3$ )  $\delta$  7.96 (d,  $J = 7.6$  Hz, 1H), 7.59 – 7.45 (m, 2H), 7.33 (d,  $J = 7.2$  Hz, 5H), 7.10 (dq,  $J = 6.4, 4.0, 3.2$  Hz, 1H), 6.04 – 5.94 (m, 1H), 5.86 (d,  $J = 8.4$  Hz, 1H), 5.47 (ddd,  $J = 15.6, 8.8, 2.0$  Hz, 1H), 1.84 – 1.63 (m, 3H);  $^{13}\text{C}$  NMR (100 MHz,  $\text{CDCl}_3$ )  $\delta$  158.3, 146.6, 145.8, 132.0, 131.9, 130.8, 128.9, 128.7 (2C), 127.6, 124.0, 123.9, 123.5 (2C), 122.1, 85.5, 17.9; HRMS:  $[\text{M}+\text{H}]^+$  calcd for  $\text{C}_{17}\text{H}_{15}\text{NO}$  250.1226, found 250.1231.

**(1Z,3Z)-3-butyldiene-N-phenylisobenzofuran-1(3H)-imine (2ak):**

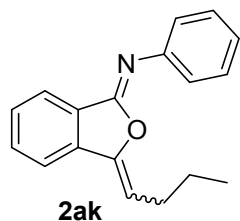

A mixture of inseparable *cis-trans* isomerism (*Z:E*  $\approx$  6.7:1); Colorless oil; Major isomer shown:  $^1\text{H}$  NMR (400 MHz,  $\text{CDCl}_3$ )  $\delta$  7.97 (d,  $J = 7.6$  Hz, 1H), 7.59 – 7.55 (m, 2H), 7.49 – 7.42 (m, 3H), 7.42 – 7.34 (m, 2H), 7.19 – 7.10 (m, 1H), 5.43 (t,  $J = 7.6$  Hz, 1H), 2.37 (q,  $J = 7.6$  Hz, 2H), 1.52 (dt,  $J = 14.8, 7.2$  Hz, 2H), 0.97 (t,  $J = 7.6$  Hz, 3H);  $^{13}\text{C}$  NMR (100 MHz,  $\text{CDCl}_3$ )  $\delta$  154.2, 148.4, 145.8, 136.7, 132.0, 130.3, 129.1, 128.7 (2C), 124.6, 124.2 (2C), 123.6, 119.3, 106.7, 29.7, 19.2, 14.1. HRMS:  $[\text{M}+\text{H}]^+$  calcd for  $\text{C}_{18}\text{H}_{17}\text{NO}$  264.1383, found 264.1384.

**(Z)-3-((Z)-but-1-en-1-yl)-N-phenylisobenzofuran-1(3H)-imine (3ak).**

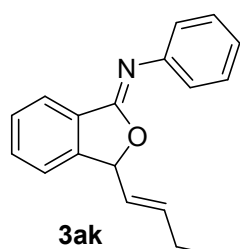

Colorless oil;  $^1\text{H}$  NMR (400 MHz,  $\text{CDCl}_3$ )  $\delta$  7.96 (d,  $J = 7.6$  Hz, 1H), 7.59 – 7.44 (m, 2H), 7.39 – 7.26 (m, 5H), 7.09 (tt,  $J = 6.0, 2.8$  Hz, 1H), 6.02 (dt,  $J = 15.2, 6.4$  Hz, 1H), 5.87 (d,  $J = 8.0$  Hz, 1H), 5.47 – 5.41 (m, 1H), 2.14 – 2.10 (m, 2H), 1.02 (t,  $J = 7.6$  Hz, 3H);  $^{13}\text{C}$  NMR (100 MHz,  $\text{CDCl}_3$ )  $\delta$  158.3, 146.6, 145.9, 138.6, 131.9, 130.8, 128.9, 128.7 (2C), 125.4, 123.9 (2C), 123.5 (2C), 122.1, 85.6, 25.3, 13.0; HRMS:  $[\text{M}+\text{H}]^+$  calcd for  $\text{C}_{18}\text{H}_{17}\text{NO}$  264.1383, found 264.1385.

## 4. Transformation of the products

### 5.1 Synthesis of NBP (Scheme 4)

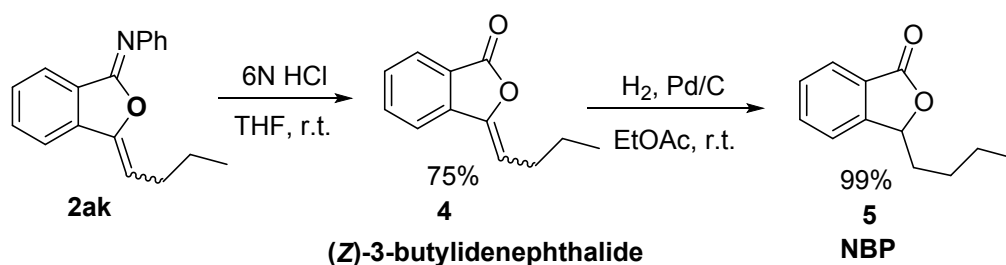

Compound **4** was synthesized according to the methods of reported literature<sup>8</sup>: the obtained product **2ak** (60 mg, 2.3 mmol) was dissolved in THF (2 mL). 6N HCl (0.5 mL) was added and the reaction mixture stirred at room temperature. After 3h, the reaction mixture was quenched with saturated aqueous NaHCO<sub>3</sub> and extracted by EtOAc (10 mL  $\times$  3). The combined organic layer was dried over anhydrous Na<sub>2</sub>SO<sub>4</sub>, filtered, and concentrated *in vacuo*. The residue was purified by flash column chromatography on silica gel (PE:EtOAc = 8:1) to afford desired product **4** (*Z/E* = 25:1) (32.5 mg, 75%) as a light yellow oil. Major isomer shown: <sup>1</sup>H NMR (400 MHz, CDCl<sub>3</sub>)  $\delta$  7.89 (dt, *J* = 8.0, 1.2 Hz, 1H), 7.74 – 7.62 (m, 2H), 7.51 (ddd, *J* = 8.0, 6.8, 1.6 Hz, 1H), 5.66 (t, *J* = 8.0 Hz, 1H), 2.47 (q, *J* = 8.0 Hz, 2H), 1.56 (q, *J* = 7.6 Hz, 2H), 1.00 (t, *J* = 7.6 Hz, 3H). The spectroscopic data was in agreement with literature report.<sup>8,9</sup>

Compound **5** was synthesized according to the methods of reported literature<sup>9</sup>: to a solution of product **4** (30 mg, 1.6 mmol) in EtOAc (3 mL) was added Pd/C (5 %, 60 mg). The reaction mixture was allowed to stir under H<sub>2</sub> protection at room temperature. After 16 h, the reaction mixture was diluted with EtOAc (10 mL) and filtered over celite. The organic layer was separated and concentrated *in vacuo*. The residue was purified by flash chromatography on silica gel (PE:EtOAc = 8:1) to give the compound **NBP** (30 mg, 1.6 mmol, 99%). <sup>1</sup>H NMR (400 MHz, CDCl<sub>3</sub>)  $\delta$  7.90 (d, *J* = 7.6 Hz, 1H), 7.68 (t, *J* = 7.6 Hz, 1H), 7.53 (t, *J* = 7.6 Hz, 1H), 7.46 (d, *J* = 7.6 Hz, 1H), 5.49 (dd, *J* = 8.0, 4.0 Hz, 1H), 2.14 – 1.98 (m, 1H), 1.84 – 1.70 (m, 1H), 1.57 – 1.18 (m, 4H), 0.91 (t, *J* = 7.2 Hz, 3H); <sup>13</sup>C NMR (100 MHz, CDCl<sub>3</sub>)  $\delta$  170.7, 150.1,

133.9, 129.0, 126.1, 125.6, 121.7, 81.4, 34.4, 26.9, 22.4, 13.9. The spectroscopic data were in agreement with literature report.<sup>9</sup>

## 5.2 Transformation of the product 2a

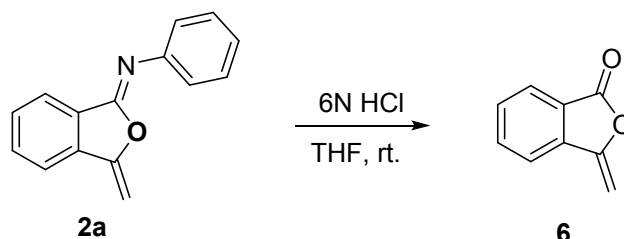

Compound **6** was synthesized according to the methods of reported literature<sup>8</sup>: the obtained product **2a** (88 mg, 4 mmol) was dissolved in THF (2 mL). 6N HCl (1 mL) was added and the reaction mixture was stirred at room temperature. After 3 h, the reaction mixture was quenched with saturated aqueous NaHCO<sub>3</sub> and extracted by EtOAc (10 mL × 3). The combined organic layer was dried over anhydrous Na<sub>2</sub>SO<sub>4</sub>, filtered, and concentrated *in vacuo*. The residue was purified by flash column chromatography on silica gel (PE:EtOAc = 8:1) to afford desired product **6** (46 mg, 78%) as white solid. <sup>1</sup>H NMR (400 MHz, CDCl<sub>3</sub>) δ 7.92 (d, *J* = 7.6 Hz, 1H), 7.73 (d, *J* = 4.4 Hz, 2H), 7.60 (dq, *J* = 8.0, 4.4 Hz, 1H), 5.24 (t, *J* = 2.4 Hz, 2H); <sup>13</sup>C NMR (100 MHz, CDCl<sub>3</sub>) δ 166.9, 151.8, 139.0, 134.5, 130.5, 125.3, 125.1, 120.6, 91.3. The spectroscopic data of **6** were in agreement with literature report.<sup>9</sup>

## 5.3 Transformation of the product 2u

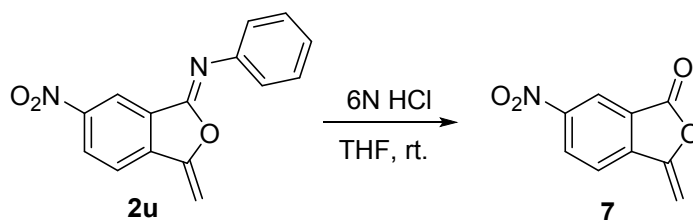

Compound **7** was synthesized according to the methods of reported literature<sup>8</sup>: The obtained product **2u** (106 mg, 4 mmol) was dissolved in THF (2 mL). 6N HCl (1 mL) was added and the reaction mixture was stirred at room temperature. After 3h, the reaction mixture was quenched with saturated aqueous NaHCO<sub>3</sub> and extracted by



EtOAc (10 mL × 3). The combined organic layer was dried over anhydrous Na<sub>2</sub>SO<sub>4</sub>, filtered, and concentrated *in vacuo*. The residue was purified by flash column chromatography on silica gel (PE:EtOAc = 8:1) to afford desired product **7** (61 mg, 80%) as white solid. <sup>1</sup>H NMR (400 MHz, CDCl<sub>3</sub>) δ 8.76 (dd, *J* = 2.0, 0.8 Hz, 1H), 8.61 (dd, *J* = 8.4, 2.0 Hz, 1H), 7.94 (dd, *J* = 8.4, 0.8 Hz, 1H), 5.54 – 5.47 (m, 2H); <sup>13</sup>C NMR (100 MHz, CDCl<sub>3</sub>) δ 164.4, 150.4, 149.4, 143.3, 129.4, 126.4, 122.0, 121.3, 95.8; HRMS: [M+H]<sup>+</sup> calcd for C<sub>9</sub>H<sub>5</sub>NO<sub>4</sub> 192.0291, found 192.0280.

## 5. Control experiments

### 6.1 Free radical inhabitation test

**Scheme S1** Free radical inhabitation test.

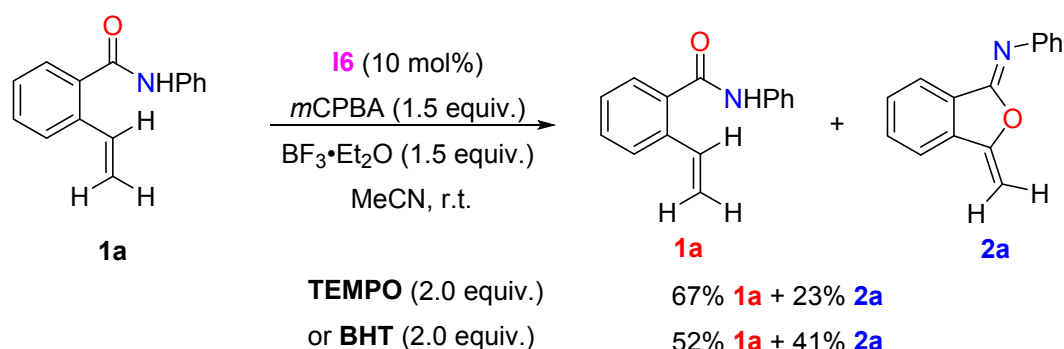

<sup>a</sup> Reaction conditions: **1a** (0.2 mmol), **I6** (0.02 mmol), *m*CPBA (0.3 mmol, 1.5 equiv.), BF<sub>3</sub>·Et<sub>2</sub>O (0.3 mmol, 1.5 equiv.), MeCN (2 mL), r.t., air atmosphere, 30 min. <sup>b</sup> Isolated yield.

**Experimental Procedure:** *m*CPBA (64.8 mg, 80%, 0.3 mmol) and **I6** (4.4 mg 0.02 mmol) were weighted into an oven-dried 10 mL Pyrex tube equipped with a magnetic stir bar. CH<sub>3</sub>CN (2.0 mL) was added and the reaction mixture was stirred vigorously for 5 min. Then, **1a** (44.6 mg, 0.2 mmol), **TEMPO/BHT (0.4 mmol, 2.0 equiv.)** and BF<sub>3</sub>·Et<sub>2</sub>O (38 μL, 0.3 mmol) were added in turn. The reaction mixture was stirred at room temperature, which was detected by TLC until completely finished. Then, the mixture was directly purified by flash chromatography (mixture of one tenth Alumina-B and nine tenth silica gel) with an eluent of PE:EtOAc = 30:1 to afford the desired product. For 2.0 equiv. TEMPO, 67 % **1a** was recovered and 23 % **2a** was isolated. For 2 equiv. BHT, 52 % **1a** was recovered and 41 % **2a** was isolated.

## 6.2 Further Lewis acid comparative experiments (Scheme 5a)

Scheme S2 Further Lewis acid effect experiments<sup>a,b</sup>

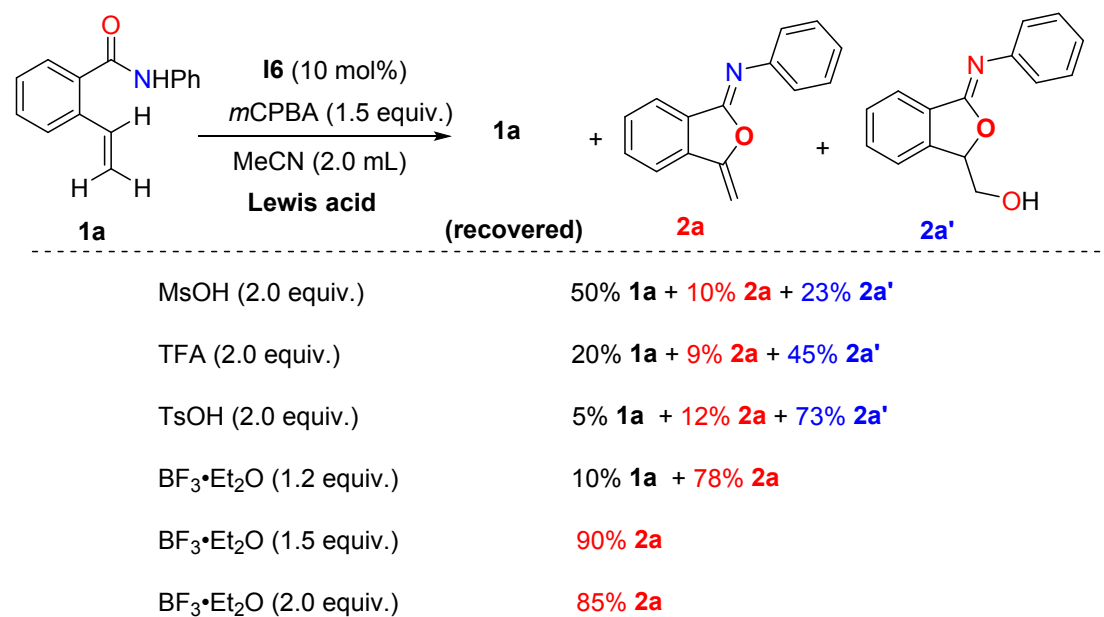

<sup>a</sup> Reaction conditions: **1a** (0.2 mmol), **I6** (0.02 mmol), *m*CPBA (0.3 mmol, 1.5 equiv.), **Lewis acid**, MeCN (2 mL), r.t., air atmosphere, 30 min. <sup>b</sup> Isolated yield.

**Experimental Procedure:** *m*CPBA (64.8 mg, 80%, 0.3 mmol) and **I6** (4.4 mg 0.02 mmol) were weighted into an oven-dried 10 mL Pyrex tube equipped with a magnetic stir bar. Dry CH<sub>3</sub>CN (2.0 mL) was added and the reaction mixture was stirred vigorously for 5 min. Then, **1a** (44.6 mg, 0.2 mmol) and **Lewis acid** were added in turn. The reaction mixture was stirred at room temperature, which was detected by TLC until completely finished. Then, the mixture was directly purified by flash chromatography (mixture of one tenth Alumina-B and nine tenth silica gel) with an eluent of PE:EtOAc = 30:1 to afford the desired product.

### Characterization data of **2a'**:

(*Z*)-(3-(phenylimino)-1,3-dihydroisobenzofuran-1-yl)methanol (**2a'**):

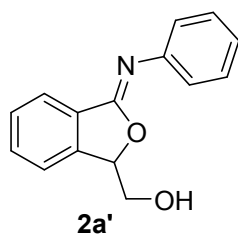

Colorless oil (37.3 mg, 78%); <sup>1</sup>H NMR (600 MHz, CDCl<sub>3</sub>) δ 7.91 (d, *J* = 7.6 Hz, 1H), 7.51 (t, *J* = 7.6 Hz, 1H), 7.43 (t, *J* = 7.6 Hz, 1H), 7.37 – 7.32 (m, 1H), 7.32 – 7.22 (m, 4H), 7.11 – 7.04 (m, 1H), 5.52 (t, *J* = 4.4 Hz, 1H), 3.97 – 3.90 (m, 1H), 3.81 – 3.74 (m, 1H), 3.30 (br, 1H); <sup>13</sup>C NMR (150 MHz, CDCl<sub>3</sub>) δ 158.8, 146.2, 143.4, 132.1, 131.3, 129.3, 128.7 (2C), 124.2, 124.1, 123.5 (2C), 121.6, 84.9, 64.2; HRMS: [M+H]<sup>+</sup> calcd for C<sub>15</sub>H<sub>13</sub>NO<sub>2</sub> 240.1019, found 240.1013.

### 6.3 <sup>1</sup>H NMR experiments

#### 6.3.1 Characterization of product 2a

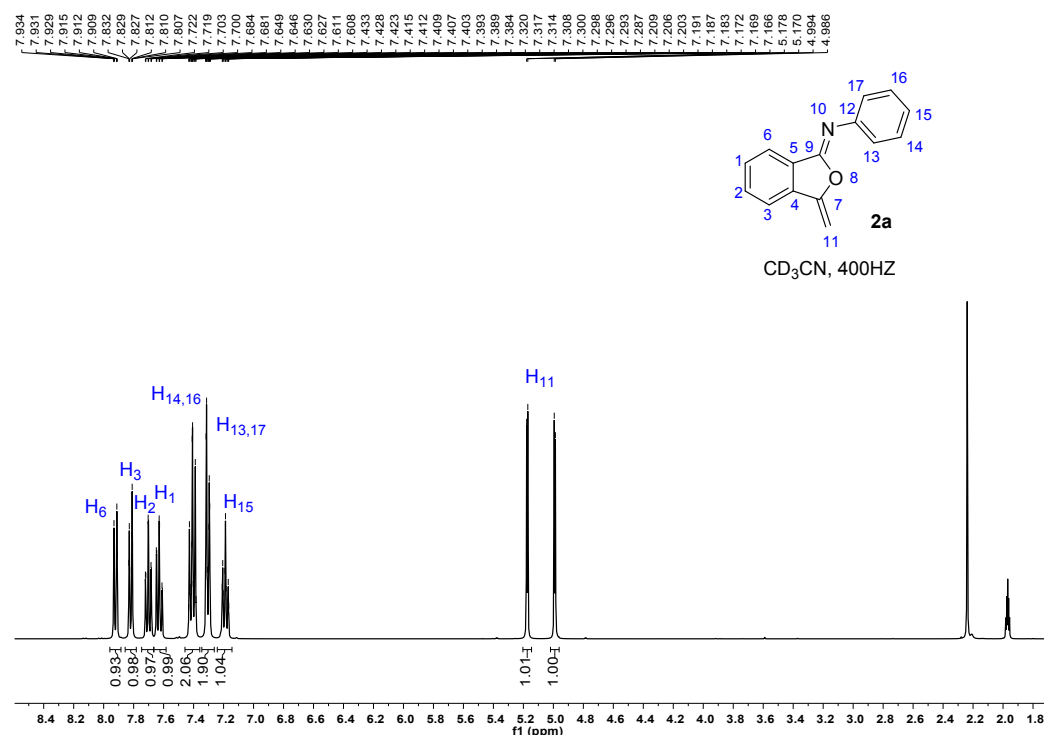

Figure S1 <sup>1</sup>H NMR spectrum for 2a in CD<sub>3</sub>CN

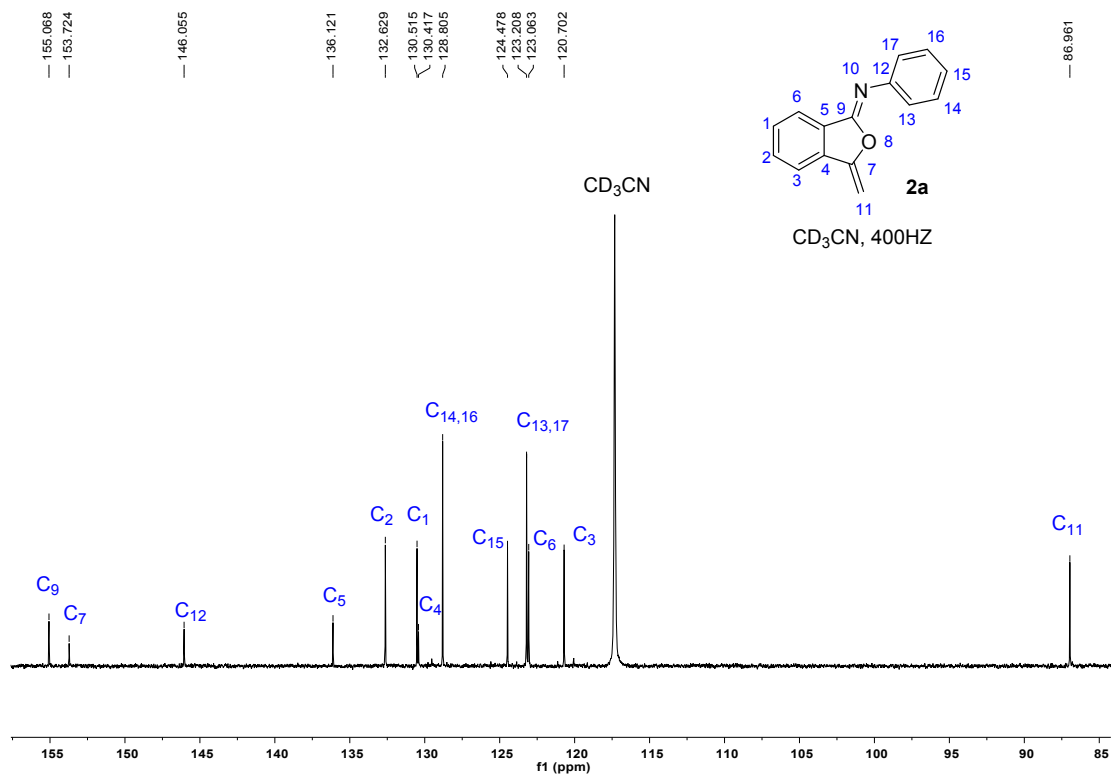

Figure S2 <sup>13</sup>C NMR spectrum for **2a** in CD<sub>3</sub>CN

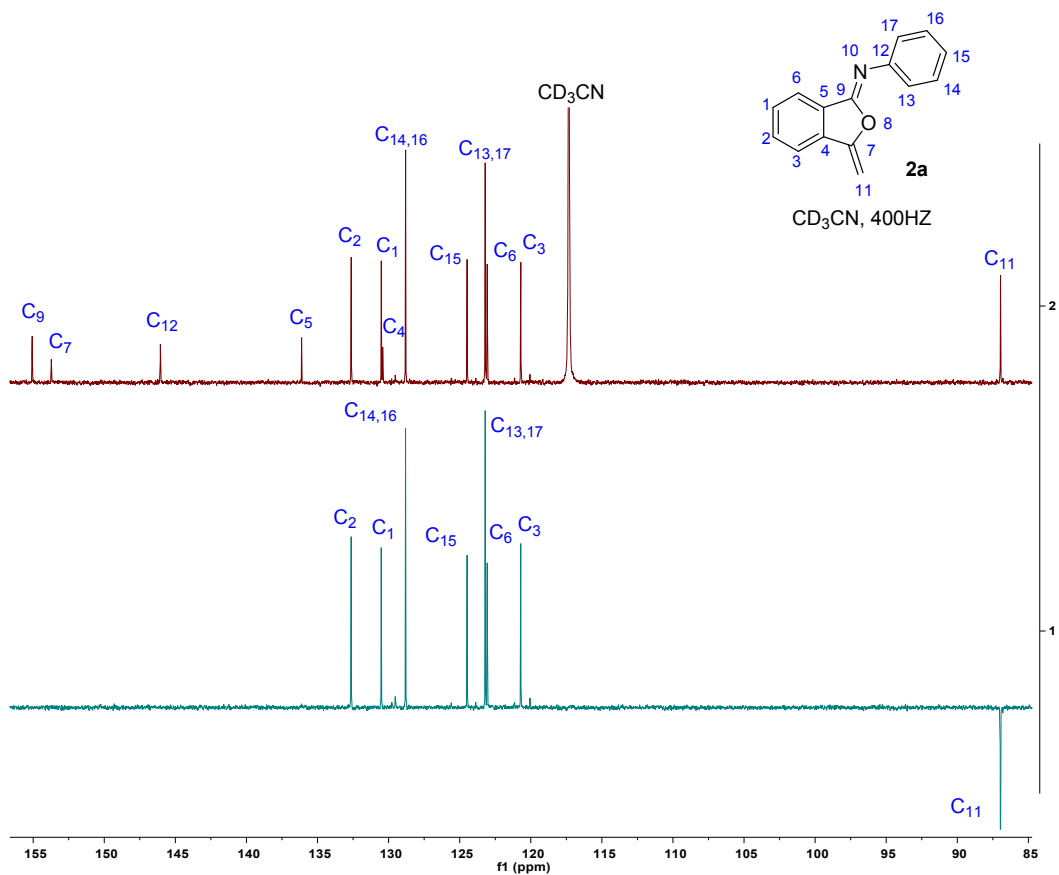

Figure S3 DEPT 135° spectrum for **2a** in CD<sub>3</sub>CN

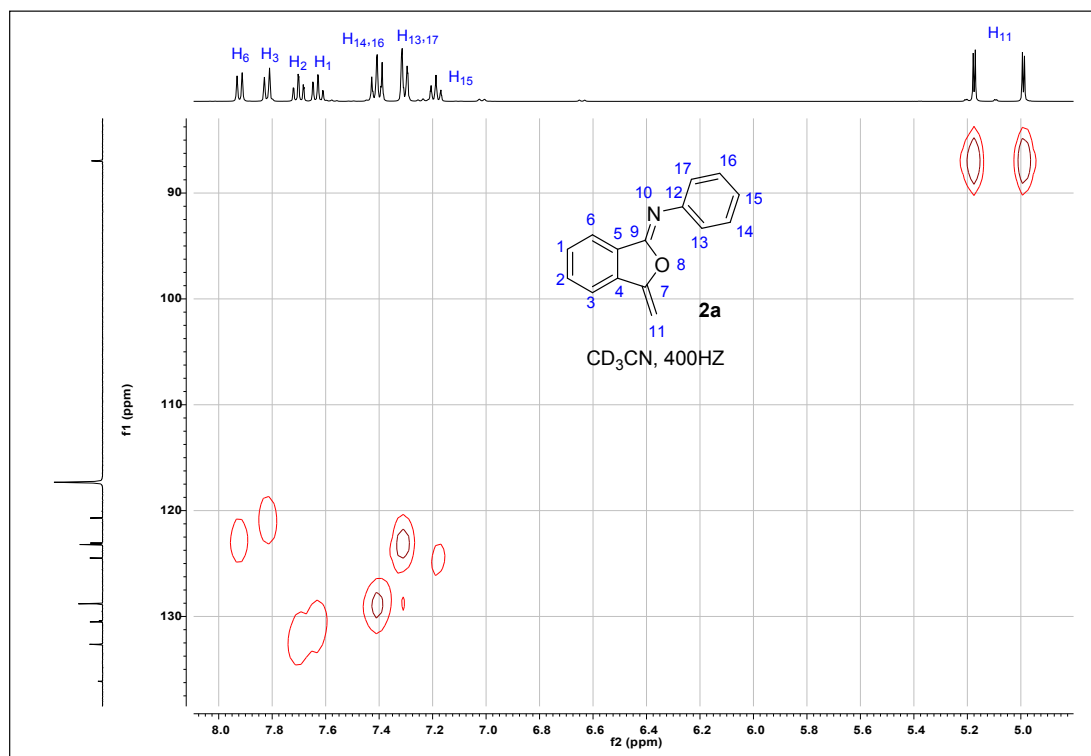

Figure S4 HSQC spectrum for **2a** in CD<sub>3</sub>CN

### 6.3.2 Dynamic <sup>1</sup>H NMR analysis (Scheme 5b)

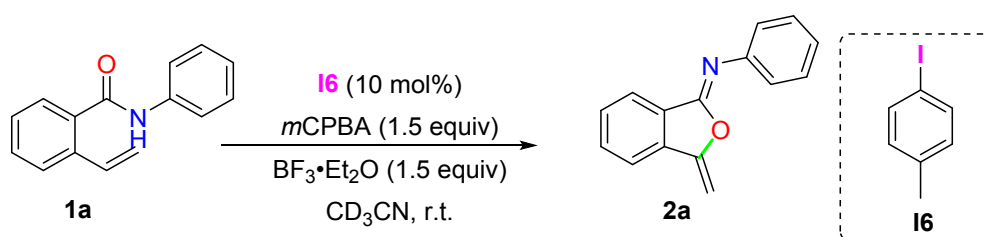

**Experimental Procedure:** *m*CPBA (21.6 mg, 80%, 0.075 mmol), **I6** (1.1 mg 0.005 mmol) and **1a** (11.2 mg, 0.05 mmol) were weighted into an oven-dried septum-capped NMR tube. CD<sub>3</sub>CN (0.5 mL, with 0.5 μL CH<sub>2</sub>Br<sub>2</sub>/mL) was added the for the first <sup>1</sup>H NMR spectroscopic analyses. Then BF<sub>3</sub>·Et<sub>2</sub>O (10 μL, 0.075 mmol) was added to the NMR tube and the <sup>1</sup>H NMR spectrum was detected continuously until completed.

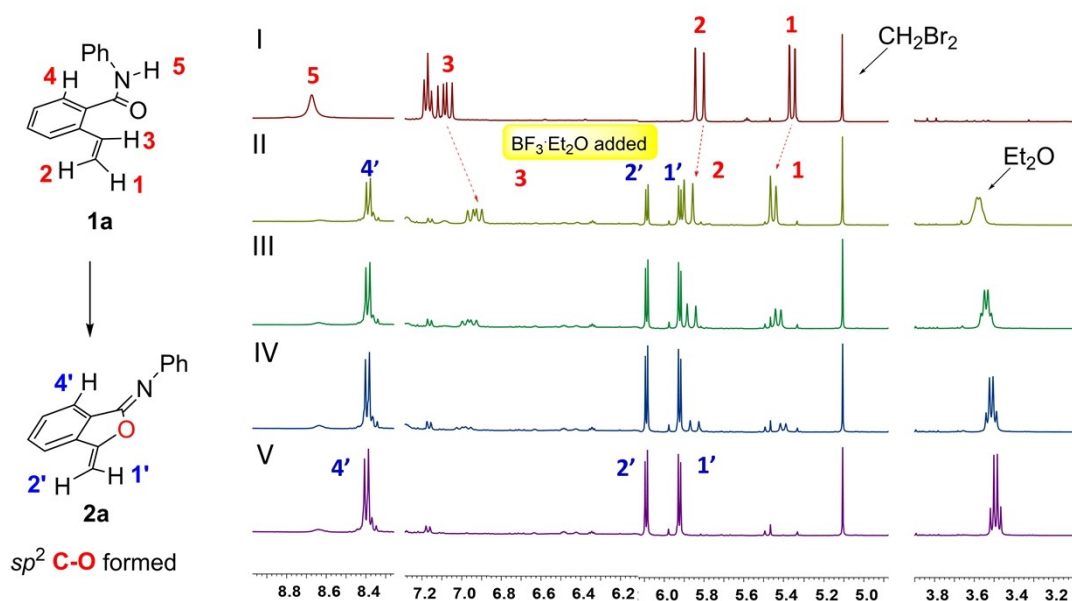

**Figure S5** <sup>a</sup> **I**: <sup>1</sup>H NMR (400 MHz) spectra of reaction mixture of **1a** (0.05 mmol), **I6** (10 mol%), and *m*CPBA (0.075 mmol) in CD<sub>3</sub>CN (0.5 mL) with CH<sub>2</sub>Br<sub>2</sub> (2.5 μL) as internal standard. **II**: BF<sub>3</sub>·Et<sub>2</sub>O (0.075 mmol) was added to the NMR tube; **III**: for 12 min; **IV**: for 22 min; **V**: for 30 min.

#### Discussion:

The reaction progress was conveniently showed by chemical shifts and intensity changes in hydrogen resonances obtained from <sup>1</sup>H NMR spectroscopy. As shown, no obvious signal changes were observed during the oxidation of **1a** with *m*CPBA (Figure S5, I). Upon adding BF<sub>3</sub>·Et<sub>2</sub>O, signals of substrate (**H1**, **H2** and **H3**) decreased and new signals of product (**H1'**, **H2'**, and **H4'**) appeared (Figure S5, II). And the gradual appearance of free Et<sub>2</sub>O (–CH<sub>2</sub> signals) confirmed liberation of the BF<sub>3</sub> unit (Figure S5, II–V). These outcomes confirmed the significant role of BF<sub>3</sub>·Et<sub>2</sub>O in triggering and accelerating the reaction process. Elongated reaction times (30 min) enabled the formation of **2a** in 95% <sup>1</sup>H NMR yield as the main product (Figure S5, V).

## 6. Comparison of the structure data of 2a, 2s and 2t with the reported<sup>10</sup>

|                                                                                     |                                               |                                                                                                                                                                                                                                                                                                                                                                                                                                                                                                                                                                |
|-------------------------------------------------------------------------------------|-----------------------------------------------|----------------------------------------------------------------------------------------------------------------------------------------------------------------------------------------------------------------------------------------------------------------------------------------------------------------------------------------------------------------------------------------------------------------------------------------------------------------------------------------------------------------------------------------------------------------|
| 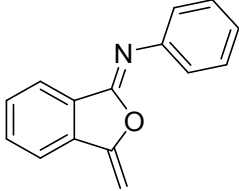   | <b>4a</b> reported by Liu group <sup>10</sup> | Blue solid; <sup>1</sup> H NMR (400 MHz, CDCl <sub>3</sub> ) δ 7.95 - 7.90 (m, 1H), 7.79 - 7.73 (m, 1H), 7.67 - 7.61 (m, 1H), 7.59 - 7.48 (m, 3H), 7.44 - 7.34 (m, 3H), 5.24 - 7.21 (m, 1H), 4.82 - 4.78 (m, 1H); <sup>13</sup> C NMR (100 MHz, CDCl <sub>3</sub> ) δ 166.7, 143.1, 136.2, 134.5, 132.3, 129.8, 129.3, 128.9, 128.1, 128.0, 123.6, 120.0, 90.5; HRMS: [M+H] <sup>+</sup> calcd for C <sub>15</sub> H <sub>11</sub> NO 222.0913, found 222.0912.                                                                                                |
|                                                                                     | <b>2a</b> reported by our group               | Colorless oil; <sup>1</sup> H NMR (400 MHz, CDCl <sub>3</sub> ) δ 7.98 (dt, <i>J</i> = 7.6, 1.2 Hz, 1H), 7.68 - 7.58 (m, 1H), 7.58 - 7.48 (m, 1H), 7.45 - 7.31 (m, 3H), 7.16 (tt, <i>J</i> = 6.8, 2.0 Hz, 1H), 5.00 (s, 2H); <sup>13</sup> C NMR (100 MHz, CDCl <sub>3</sub> ) δ 155.1, 153.9, 145.7, 136.2, 132.2, 130.8, 130.2, 128.8 (2C), 124.7, 123.7 (2C), 123.6, 120.3, 87.2; HRMS: [M+H] <sup>+</sup> calcd for C <sub>15</sub> H <sub>11</sub> NO 222.0913, found 222.0912.                                                                           |
|  | <b>4b</b> reported by Liu group <sup>10</sup> | Blue solid; <sup>1</sup> H NMR (400 MHz, CDCl <sub>3</sub> ) δ 7.72 (s, 1H), 7.64 (d, <i>J</i> = 7.8 Hz, 1H), 7.51 (t, <i>J</i> = 7.6 Hz, 2H), 7.47 - 7.41 (m, 2H), 7.38 (t, <i>J</i> = 7.8 Hz, 2H), 5.16 (d, <i>J</i> = 1.9 Hz, 1H), 4.75 (d, <i>J</i> = 1.9 Hz, 1H), 2.49 (s, 3H); <sup>13</sup> C NMR (100 MHz, CDCl <sub>3</sub> ) δ 166.8, 143.1, 140.2, 134.6, 133.7, 133.3, 129.3, 128.1, 127.9, 126.5, 123.7, 119.9, 89.7, 21.6; HRMS (ESI) calcd for C <sub>16</sub> H <sub>14</sub> NO <sup>+</sup> : 236.1070 (M <sup>+</sup> +H), found: 236.1076. |
|                                                                                     | <b>2s</b> reported by our group               | Colorless oil; <sup>1</sup> H NMR (400 MHz, CDCl <sub>3</sub> ) δ 7.78 (s, 1H), 7.52 (d, <i>J</i> = 8.0 Hz, 1H), 7.37 (d, <i>J</i> = 5.6 Hz, 5H), 7.15 (tt, <i>J</i> = 6.4, 2.4 Hz, 1H), 4.93 (q, <i>J</i> = 2.8 Hz, 2H), 2.47 (s, 3H); <sup>13</sup> C NMR (100 MHz, CDCl <sub>3</sub> ) δ 155.2, 154.0, 145.7, 140.7, 133.8, 133.4, 131.1, 128.7(2C), 124.6, 123.7 (2C), 123.6, 120.1, 86.3, 21.6; HRMS: [M+H] <sup>+</sup> calcd for C <sub>16</sub> H <sub>13</sub> NO 236.1070, found 236.1071.                                                           |

|                                                                                   |                                                     |                                                                                                                                                                                                                                                                                                                                                                                                                                                                                                                                                         |
|-----------------------------------------------------------------------------------|-----------------------------------------------------|---------------------------------------------------------------------------------------------------------------------------------------------------------------------------------------------------------------------------------------------------------------------------------------------------------------------------------------------------------------------------------------------------------------------------------------------------------------------------------------------------------------------------------------------------------|
| 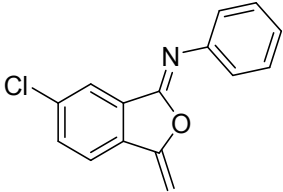 | <p><b>4e</b> reported by Liu group<sup>10</sup></p> | <p>Blue solid; <sup>1</sup>H NMR (400 MHz, CDCl<sub>3</sub>) δ 7.72 (s, 1H), 7.64 (d, <i>J</i> = 7.8 Hz, 1H), 7.51 (t, <i>J</i> = 7.6 Hz, 2H), 7.47 - 7.41 (m, 2H), 7.38 (t, <i>J</i> = 7.8 Hz, 2H), 5.16 (d, <i>J</i> = 1.9 Hz, 1H), 4.75 (d, <i>J</i> = 1.9 Hz, 1H), 2.49 (s, 3H); <sup>13</sup>C NMR (100 MHz, CDCl<sub>3</sub>) δ 166.8, 143.1, 140.2, 134.6, 133.7, 133.3, 129.3, 128.1, 127.9, 126.5, 123.7, 119.9, 89.7, 21.6; HRMS (ESI) calcd for C<sub>16</sub>H<sub>14</sub>NO<sup>+</sup>: 236.1070 (M<sup>+</sup>+H), found: 236.1076.</p> |
|                                                                                   | <p><b>2t</b> reported by our group</p>              | <p>White solid; <sup>1</sup>H NMR (400 MHz, CDCl<sub>3</sub>) δ 7.94 (d, <i>J</i> = 1.6 Hz, 1H), 7.53 (s, 2H), 7.37 (d, <i>J</i> = 4.4 Hz, 4H), 7.17 (tt, <i>J</i> = 5.4, 3.6 Hz, 1H), 5.01 (d, <i>J</i> = 3.2 Hz, 1H), 4.97 (d, <i>J</i> = 3.2 Hz, 1H); <sup>13</sup>C NMR (100 MHz, CDCl<sub>3</sub>) δ 154.4, 152.3, 145.1, 136.4, 134.5, 132.5, 132.5, 128.8 (2C), 125.1, 123.9 (2C), 123.6, 121.5, 87.8; HRMS: [M+H]<sup>+</sup> calcd for C<sub>15</sub>H<sub>10</sub>ClNO 256.0524, found 256.0523.</p>                                          |



## 7. Reference

1. S. Seth, S. Jhulki and J. N. Moorthy, *Eur. J. Org. Chem.*, 2013, 2445.
2. Q. Zhang, Y. Wang, T. Yang, L. Li and D. Li, *Tetrahedron Lett.*, 2015, **56**, 6136.
3. Z. Chen, L. Wu, H. Fang, T. Zhang, Z. Mao, Y. Zou, X. Zhang and M. Yan, *Adv. Synth. Catal.*, 2017, **359**, 3894.
4. P. Dydio and J. N. H. Reek, *Angew. Chem., Int. Ed.*, 2013, **52**, 3878.
5. S. A. Shahzad, C. Vivant and T. Wirth, *Org. Lett.*, 2010, **12**, 1364.
6. G. Yang and W. Zhang, *Org. Lett.*, 2011, **14**, 268.
7. A. A. Folgueziras-Amador, K. Philipps, S. Guilbaud, J. Poelakker and T. Wirth, *Angew. Chem., Int. Ed.*, 2017, **56**, 15446.
8. D. Ding, T. Mou, J. Xue and X. Jiang, *Chem. Commun.*, 2017, **53**, 5279.
9. X. He and F. Xue, *Tetrahedron Lett.*, 2014, **55**, 1956.
10. Y. Wang, B. Ouyang, G. Qiu, H. Zhou and J. Liu, *Org. Biomol. Chem.*, 2019, **17**, 4335.

## 8. $^1\text{H}$ , $^{13}\text{C}$ and $^{19}\text{F}$ NMR spectra

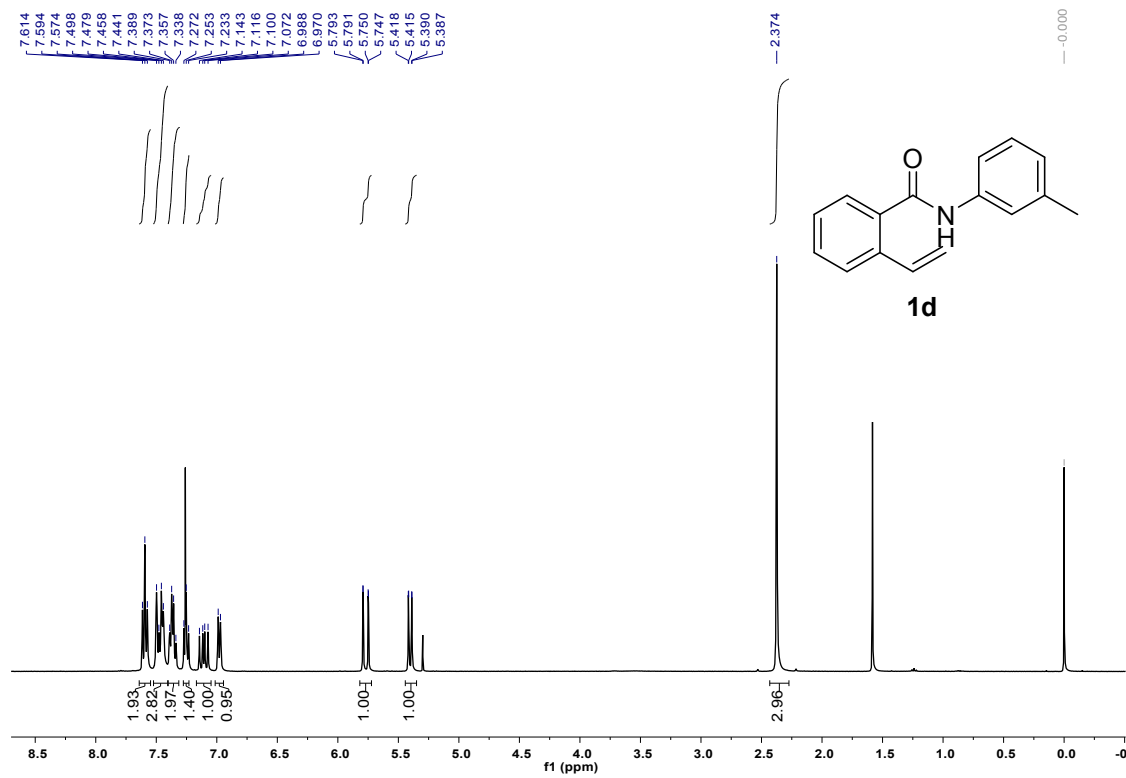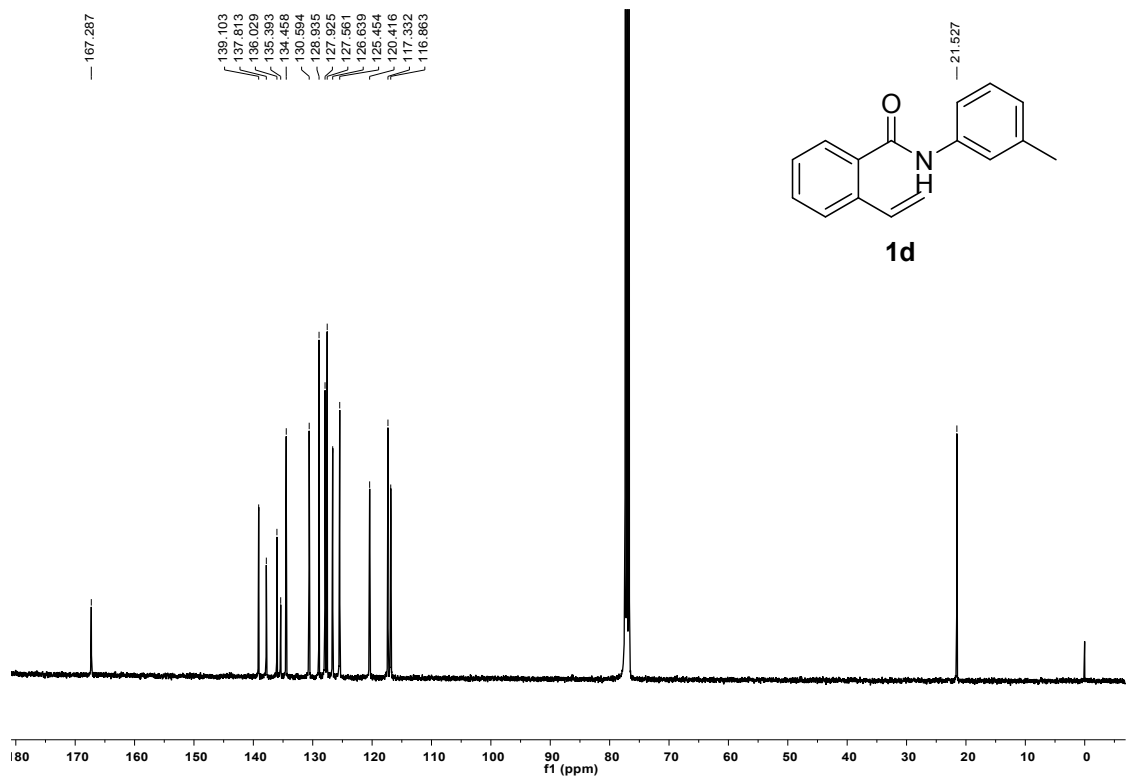

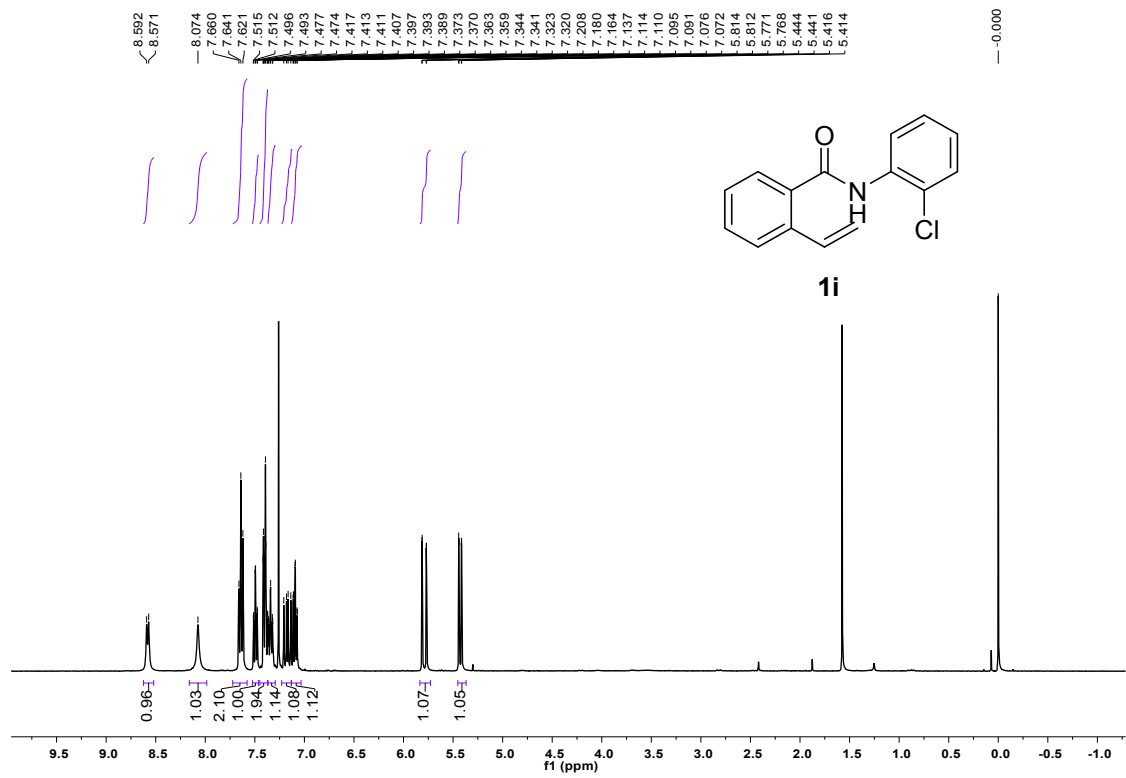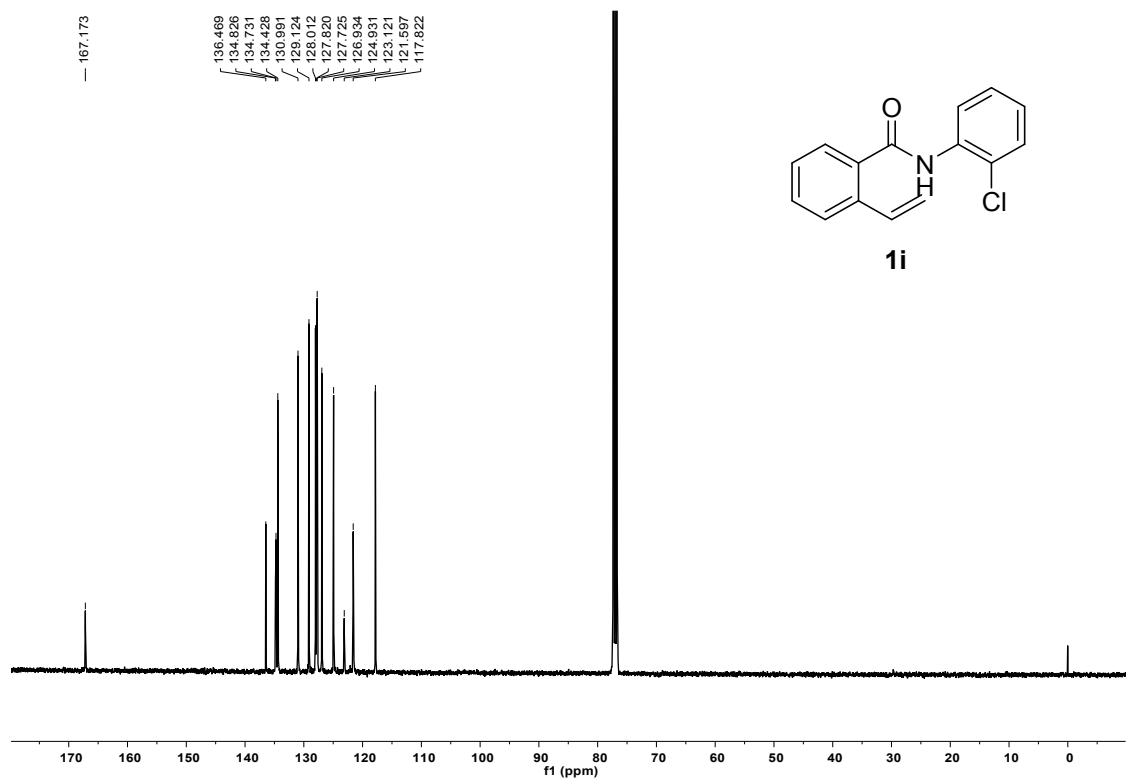

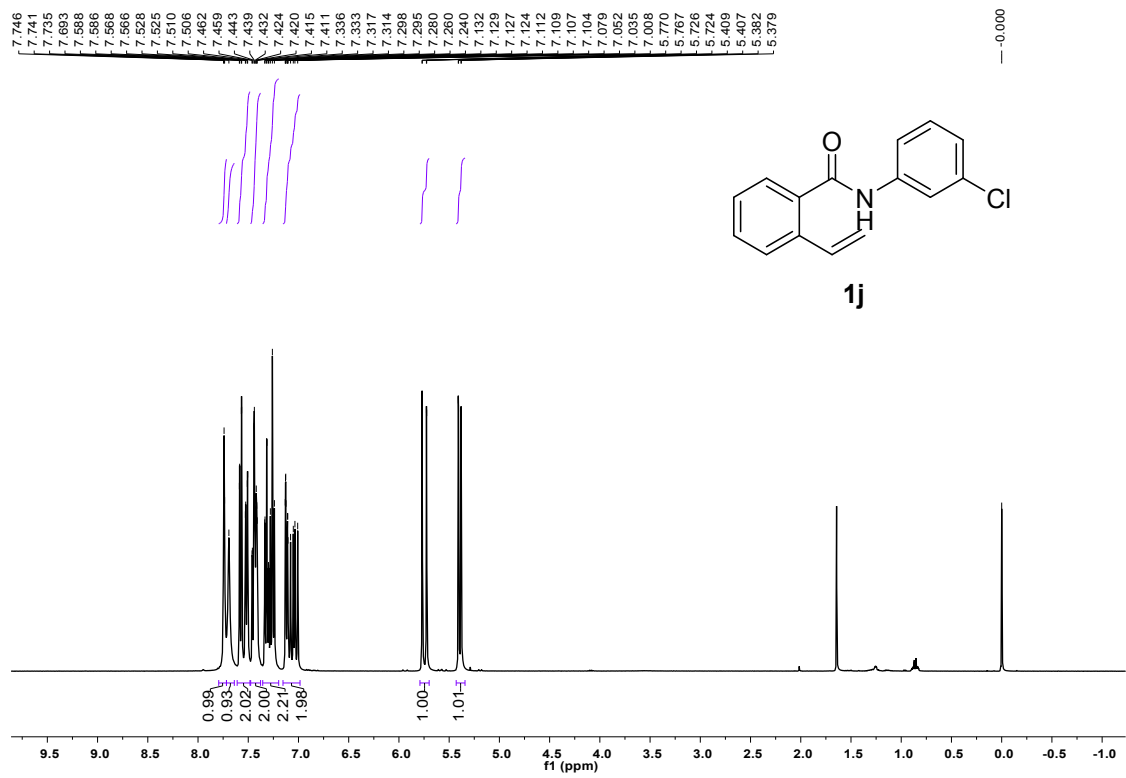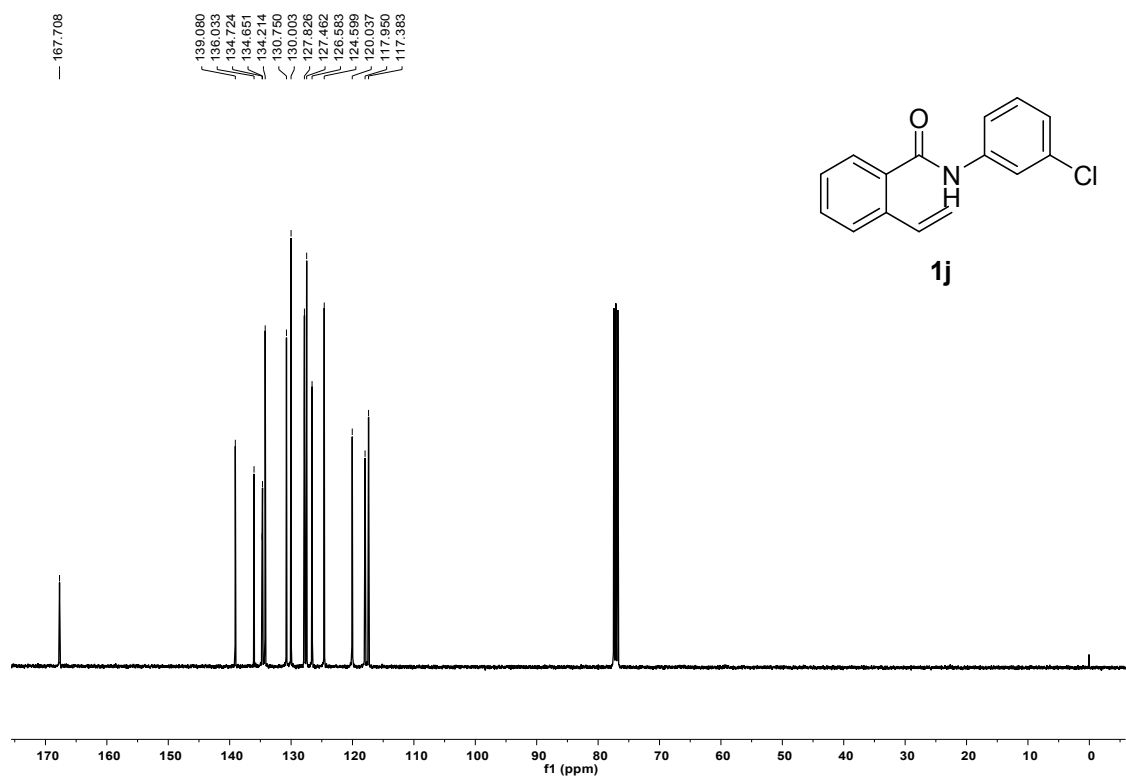

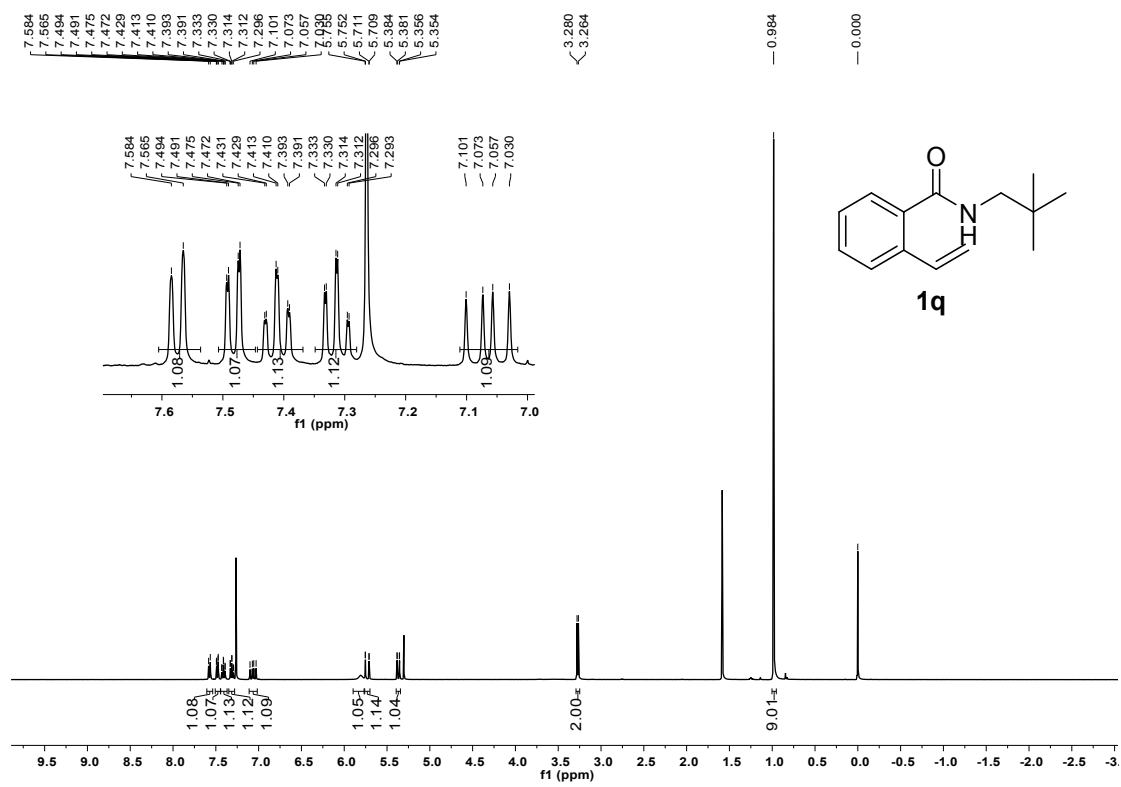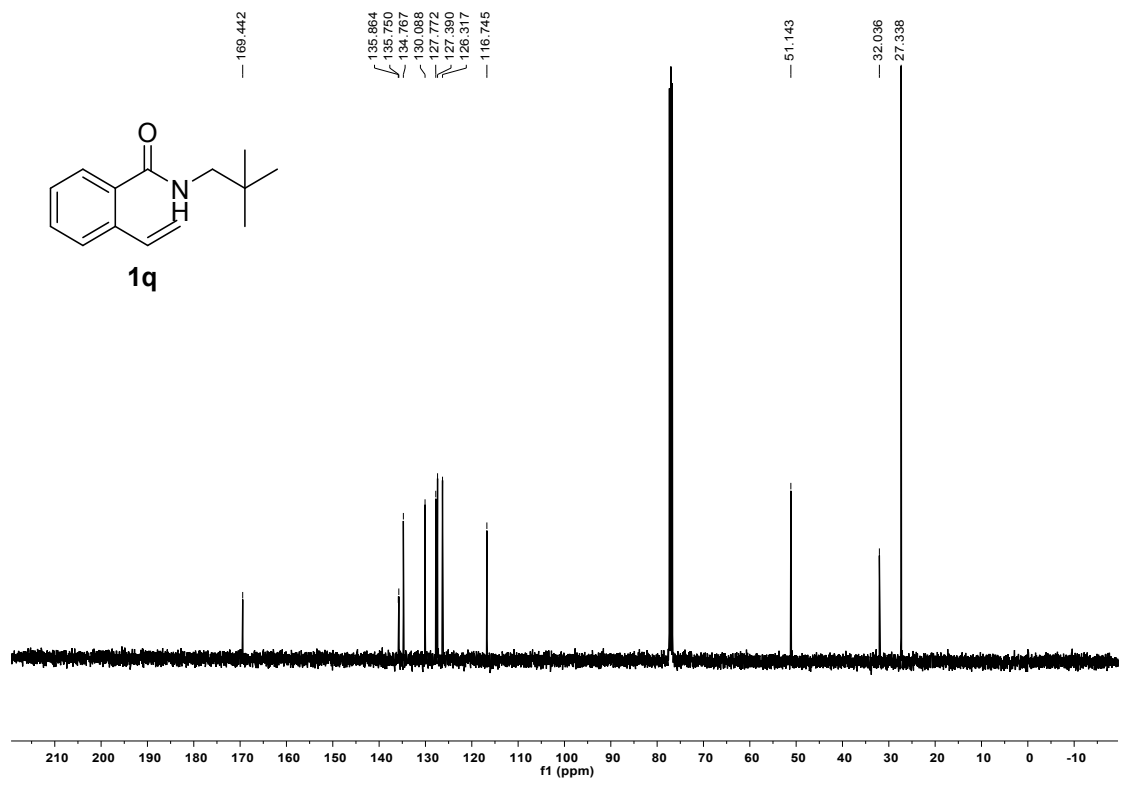

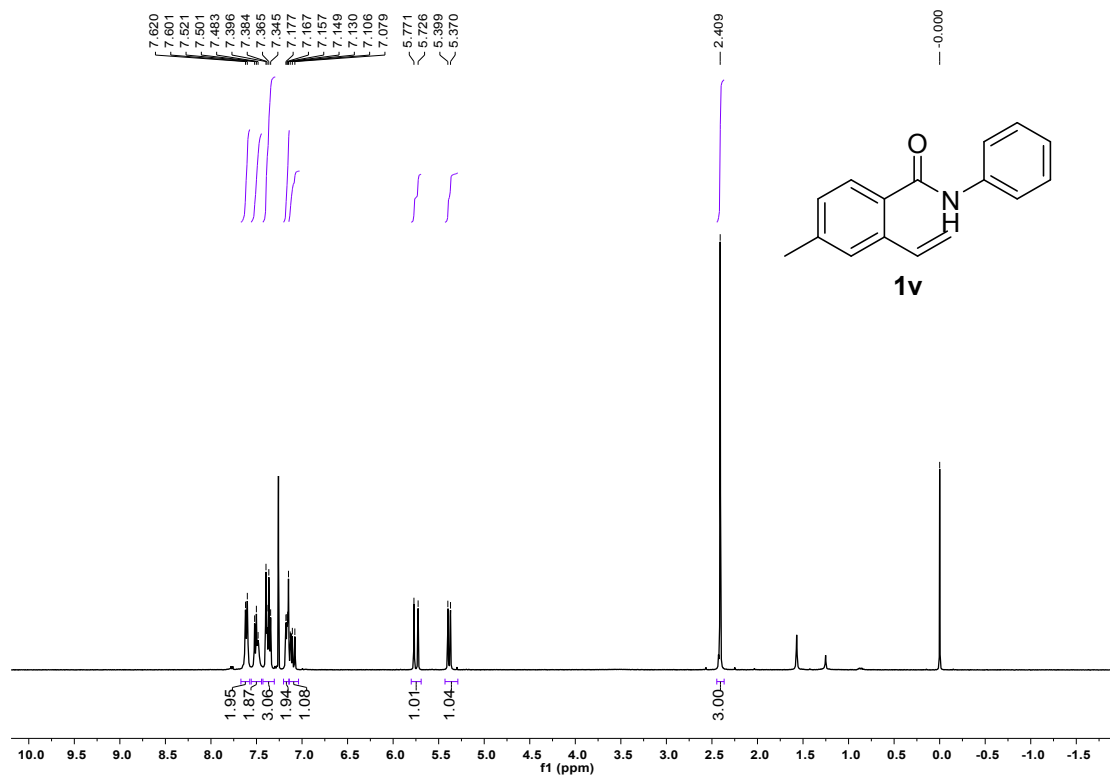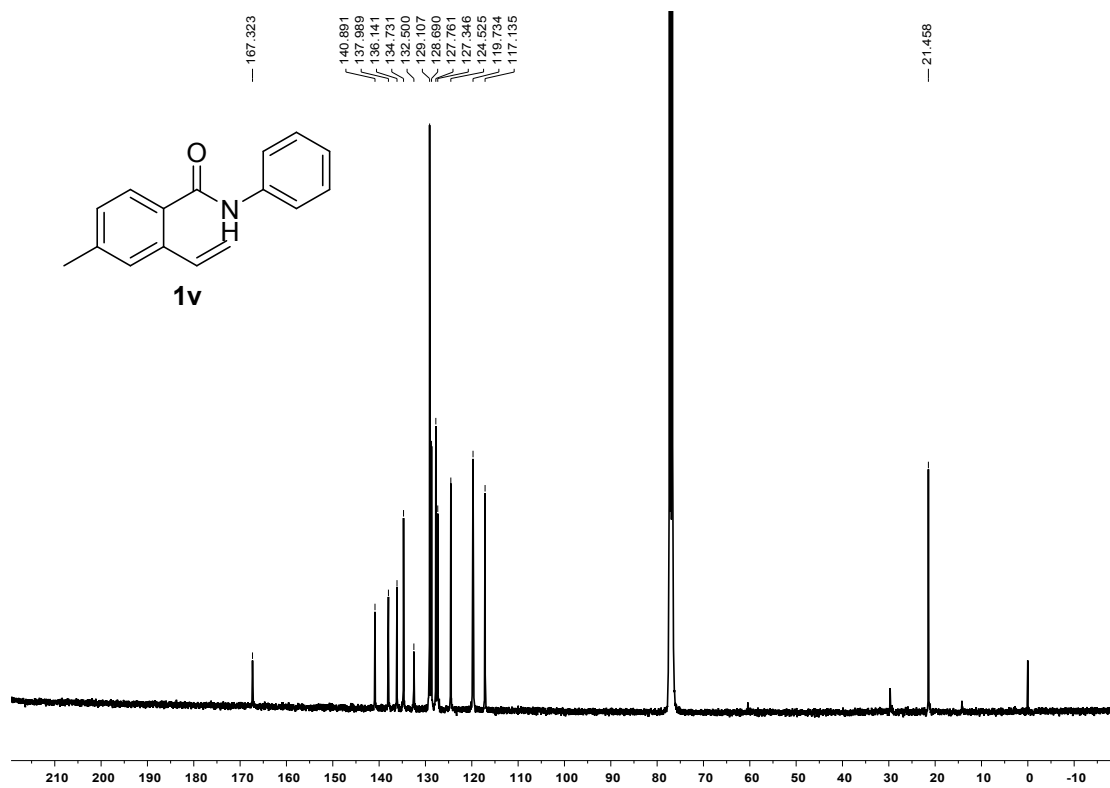

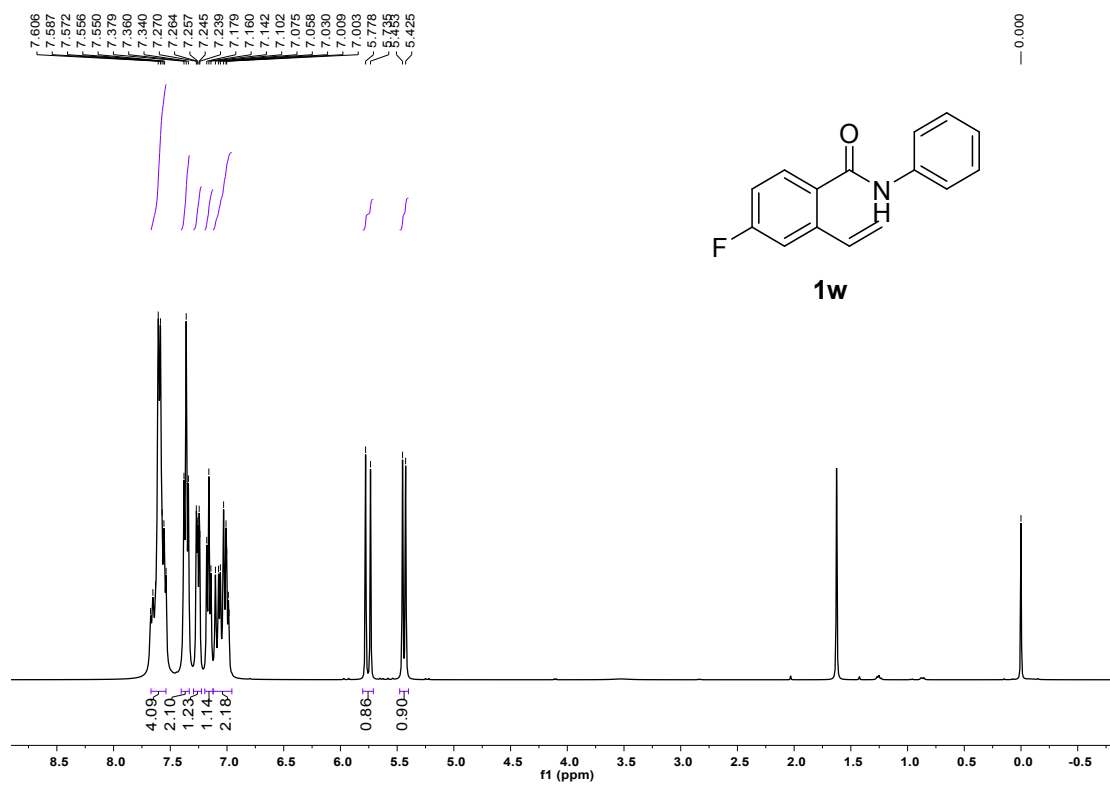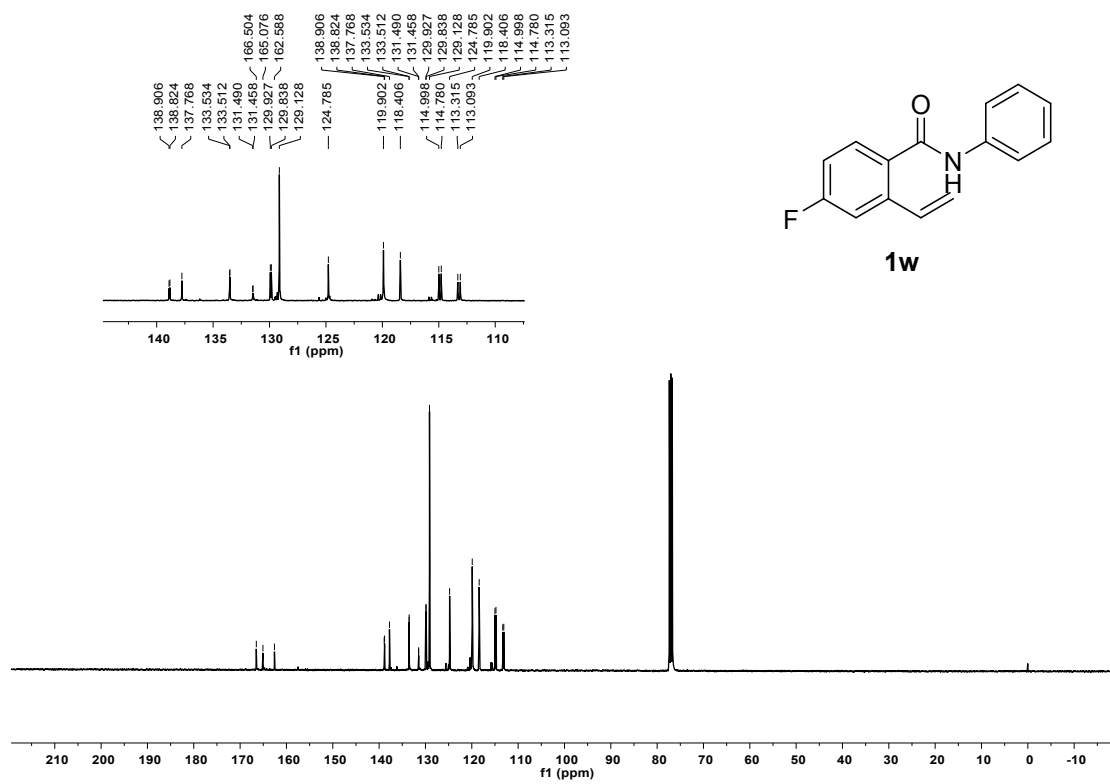

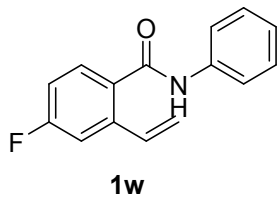

— -109.356

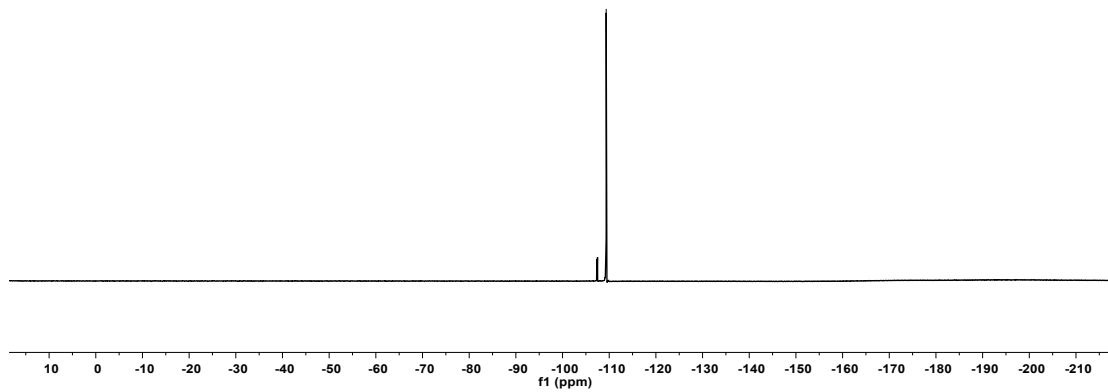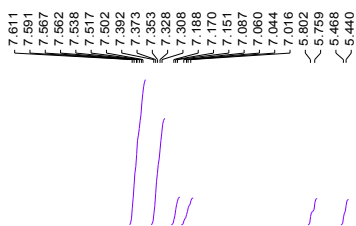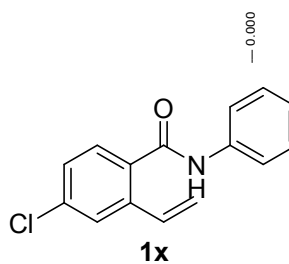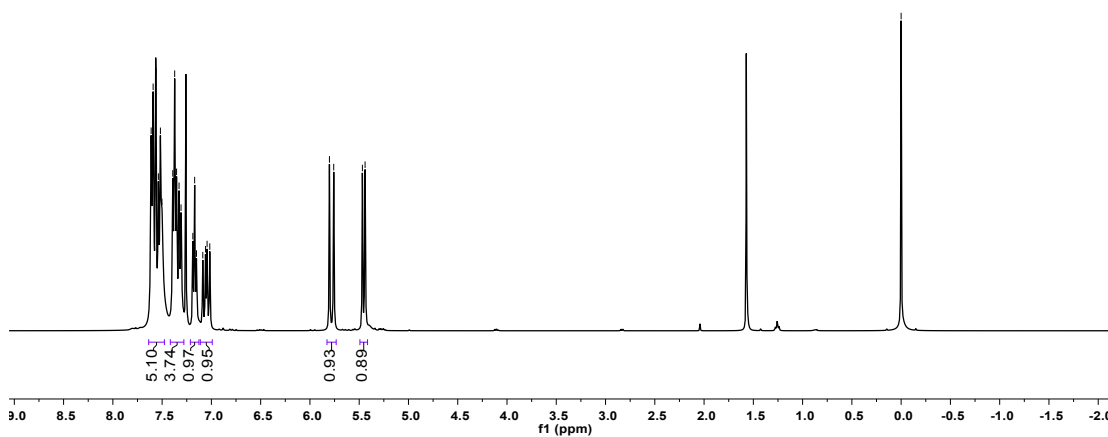



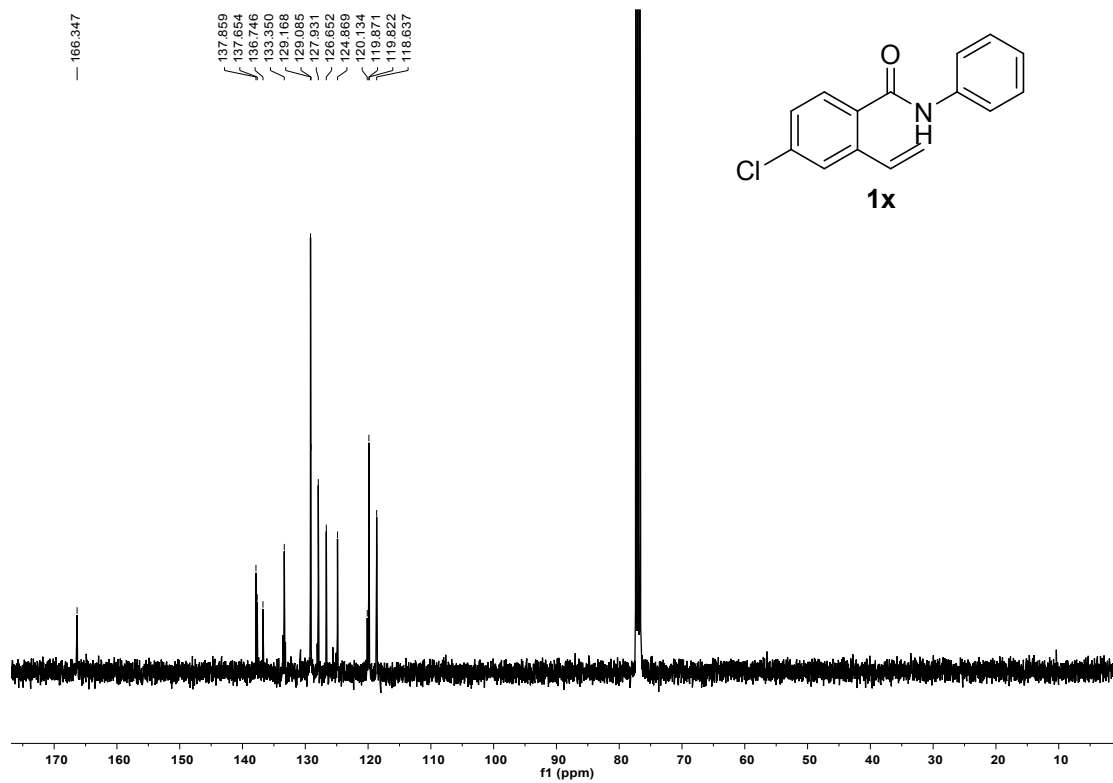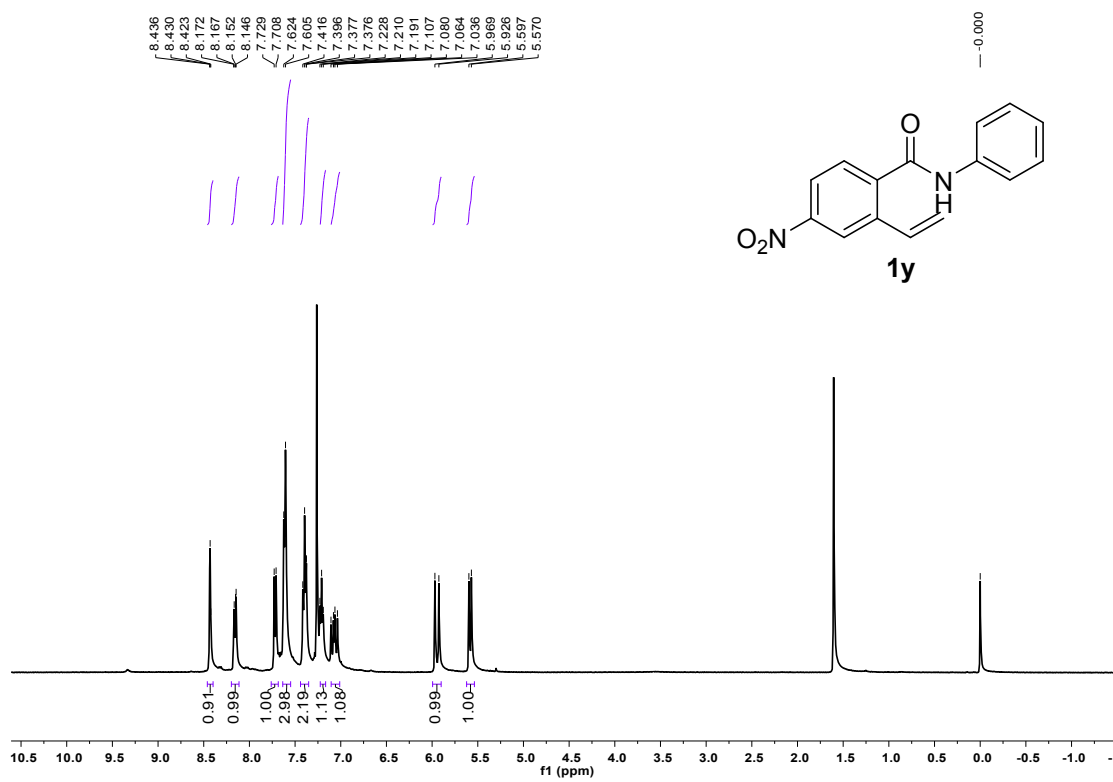

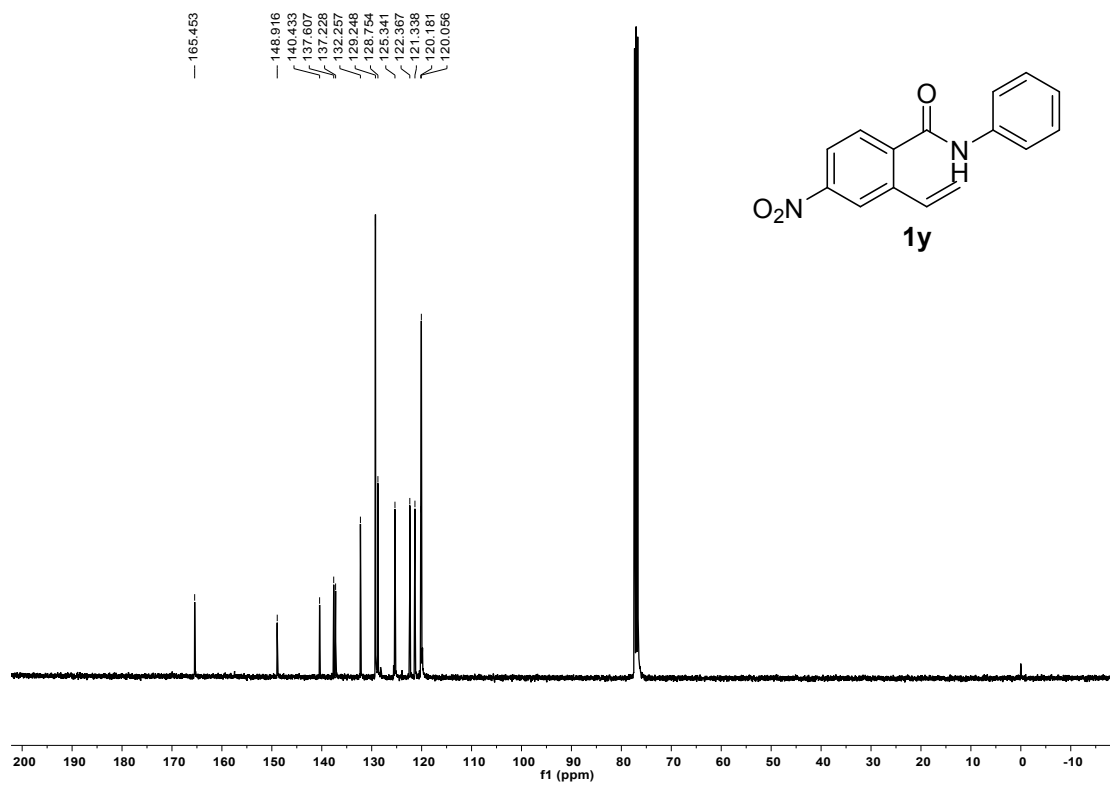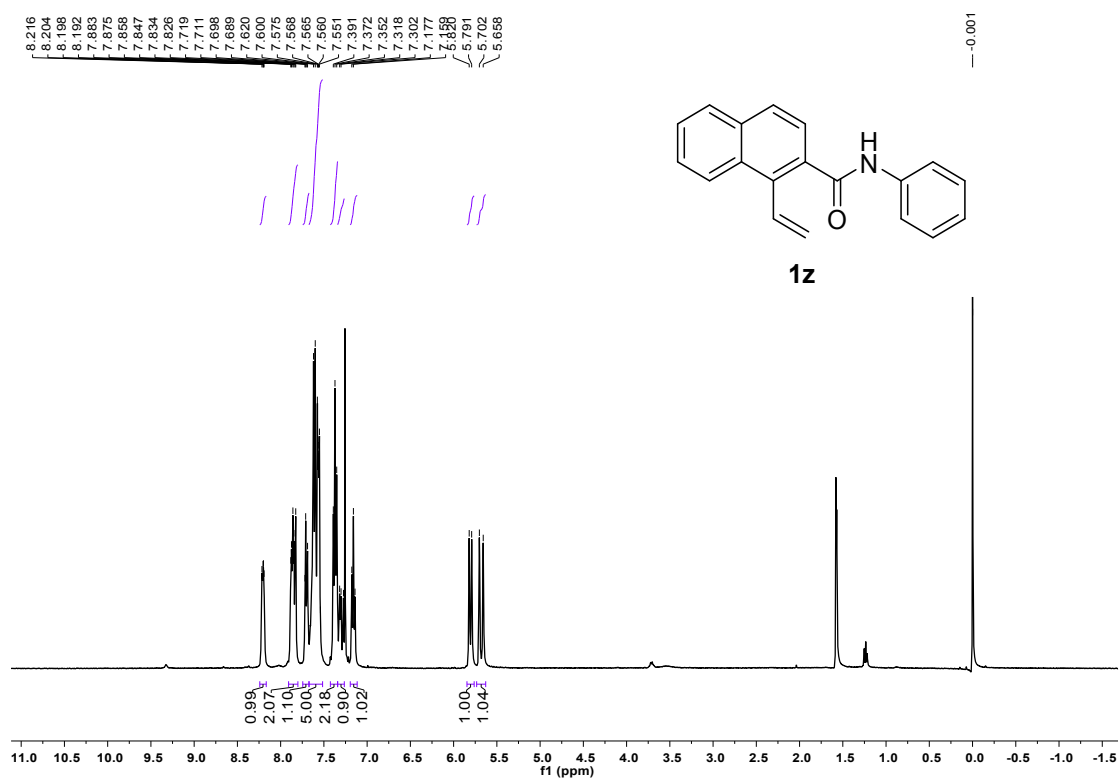

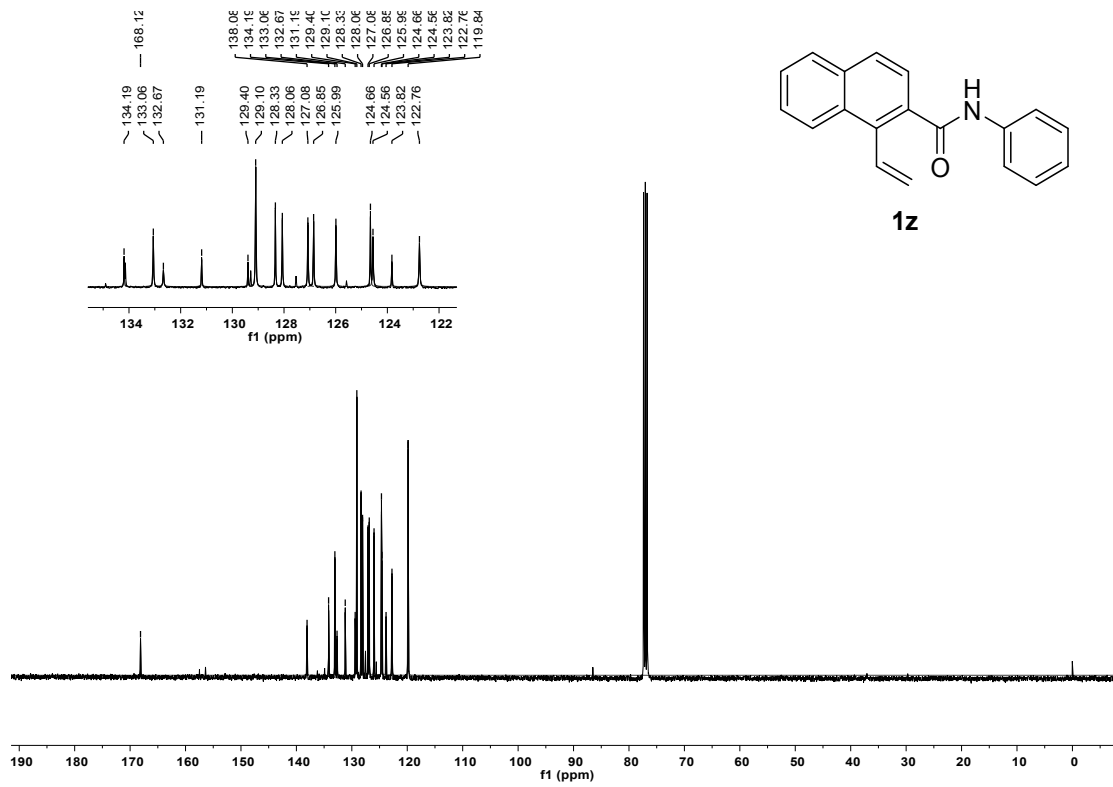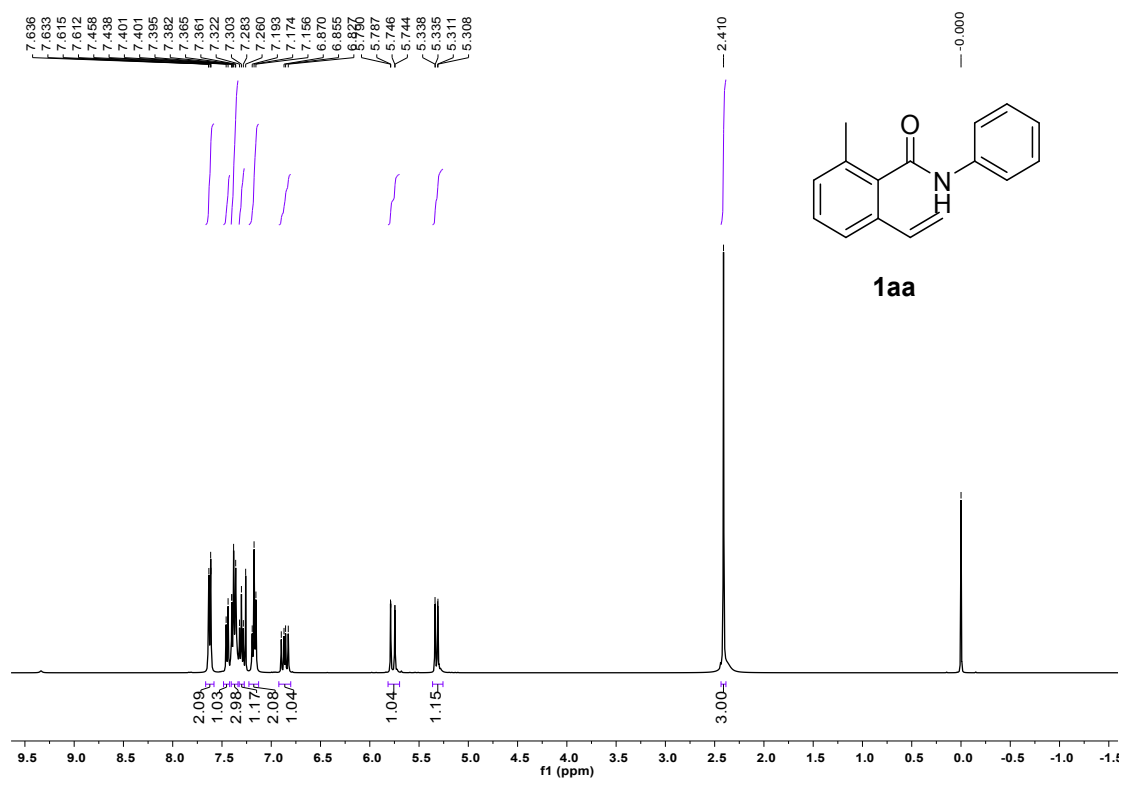

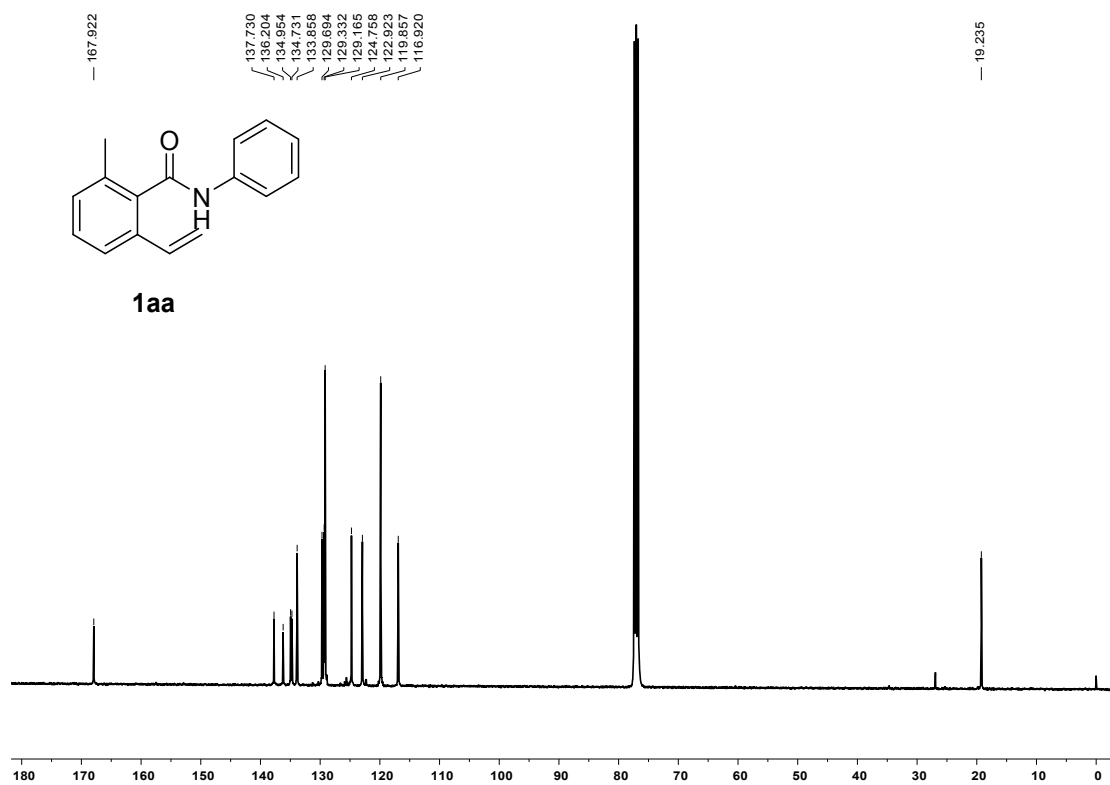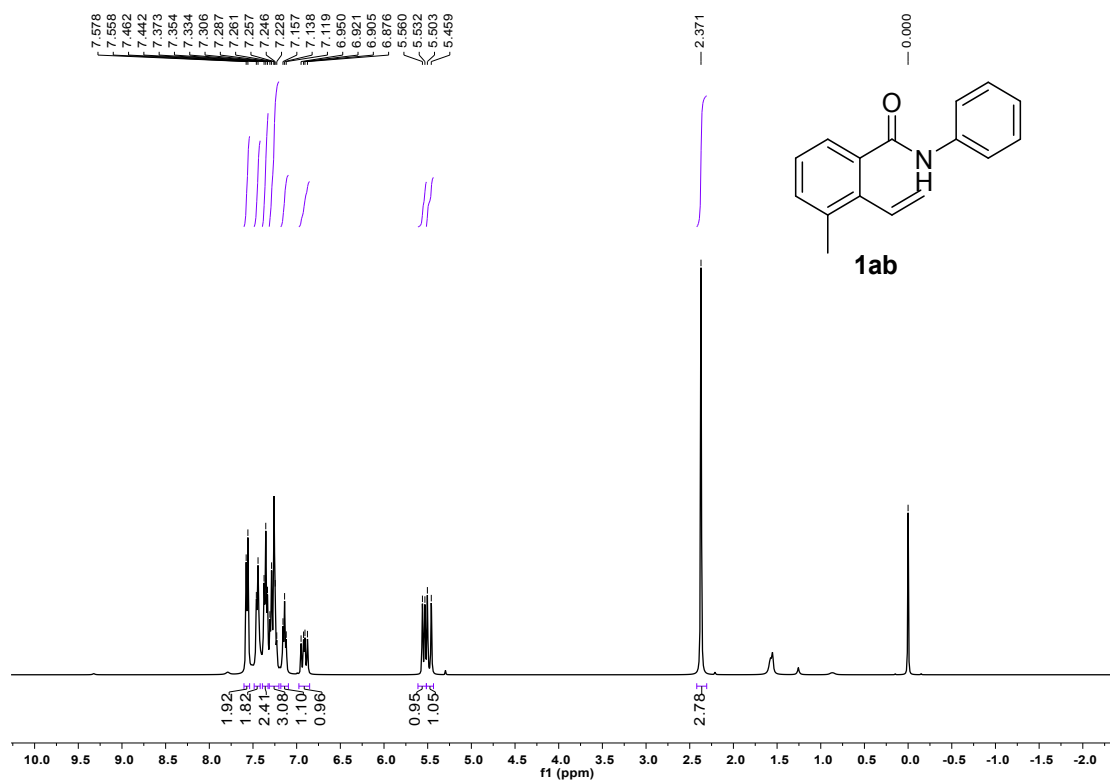

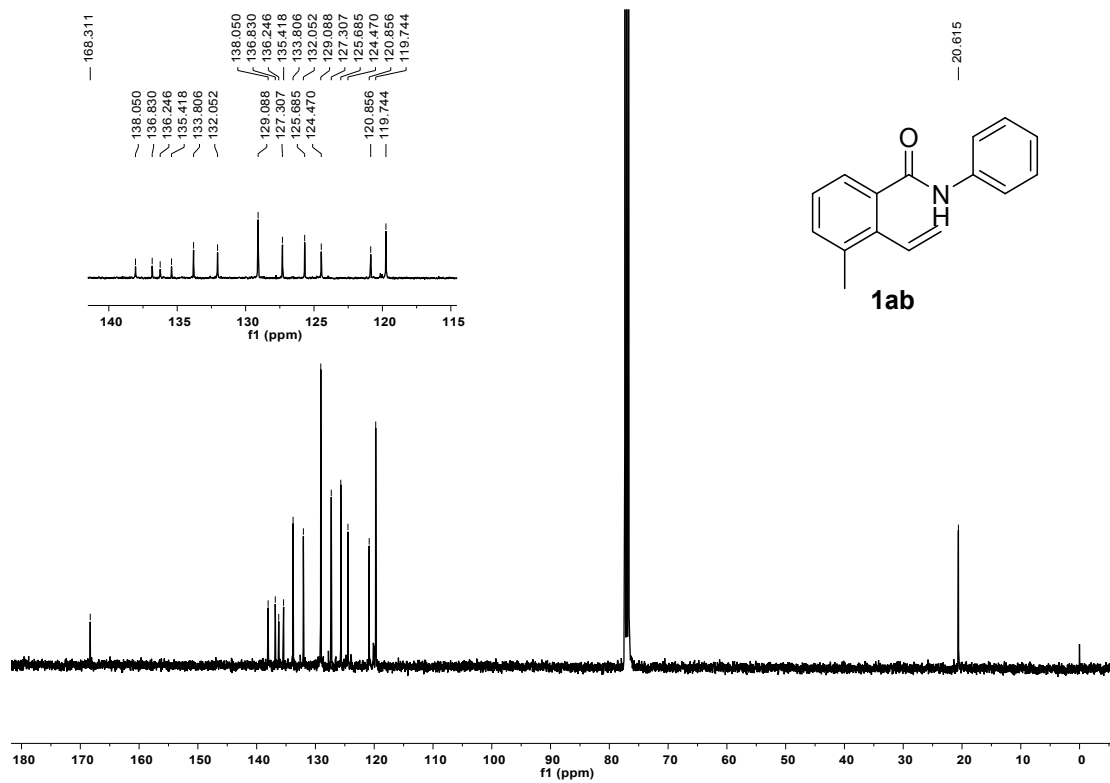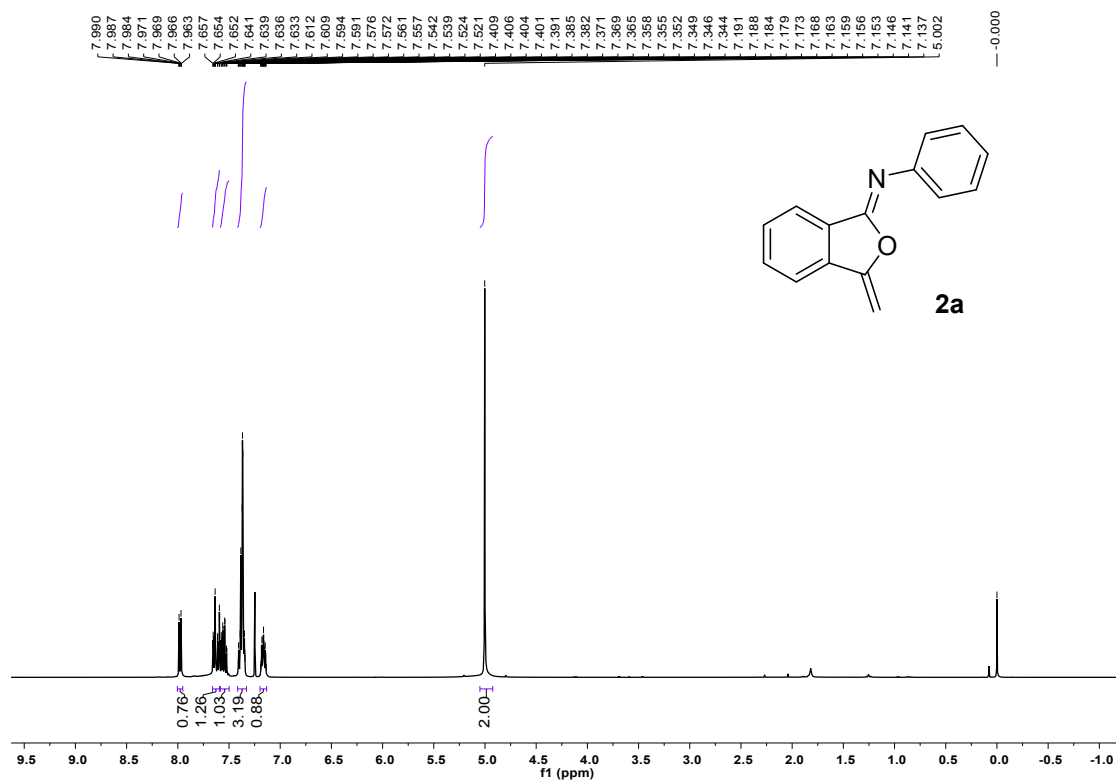

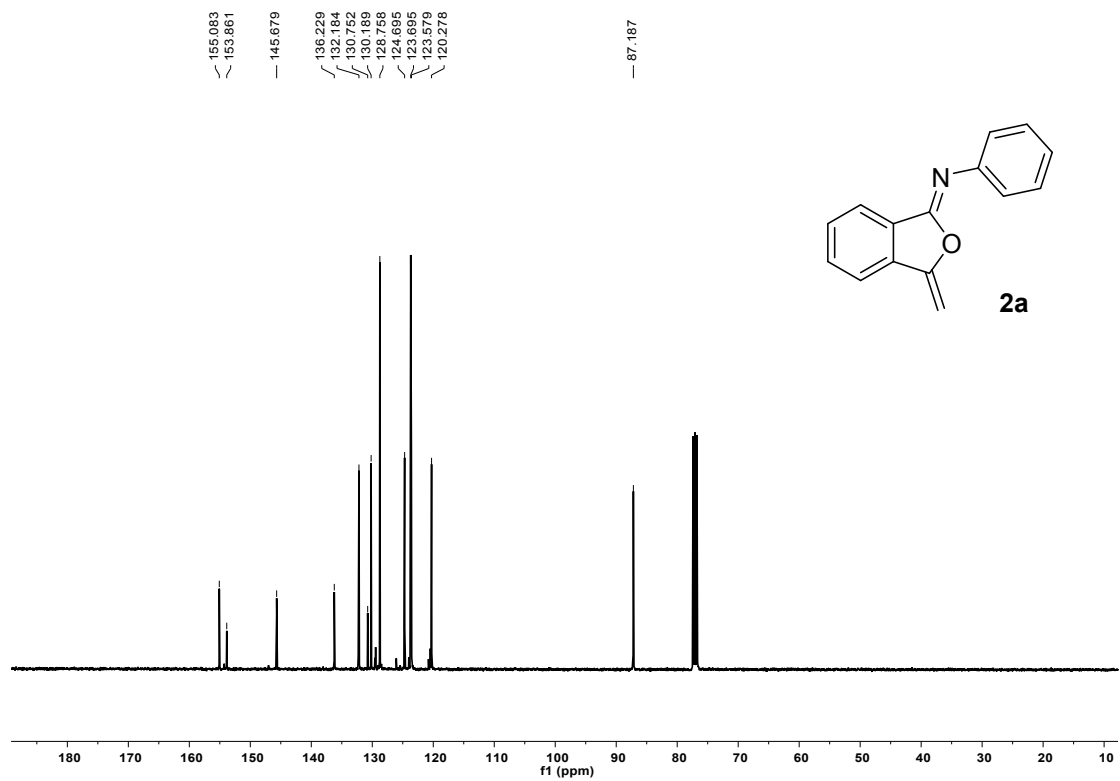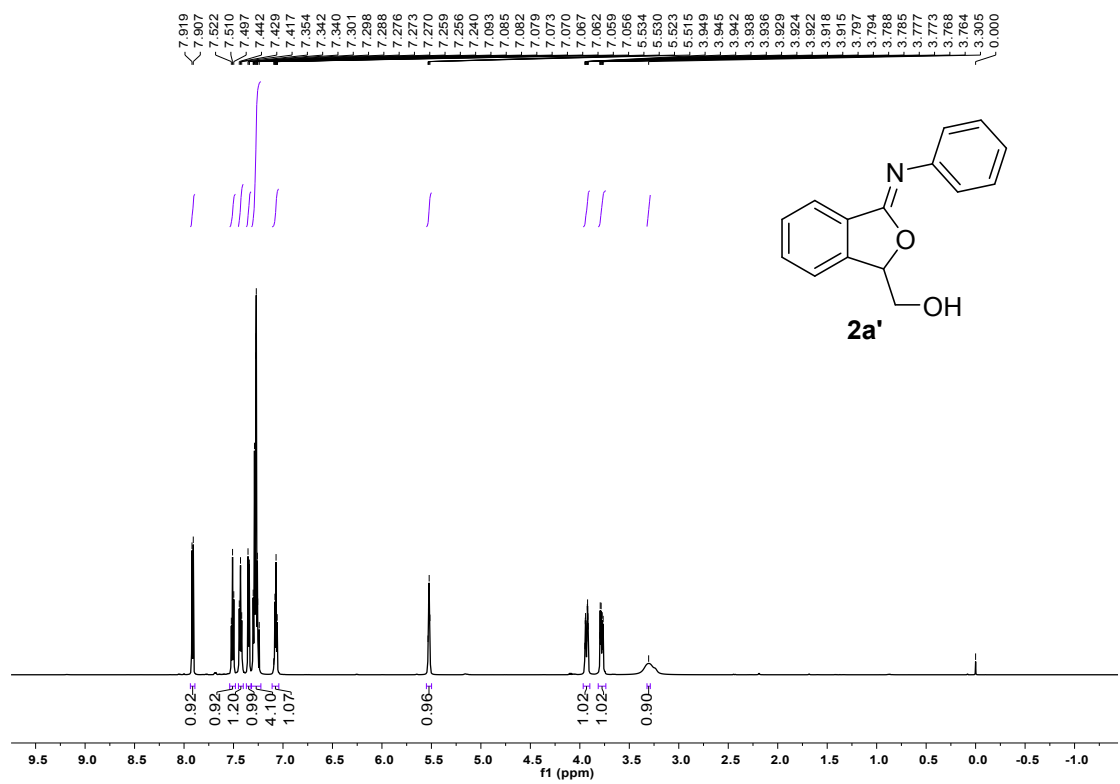

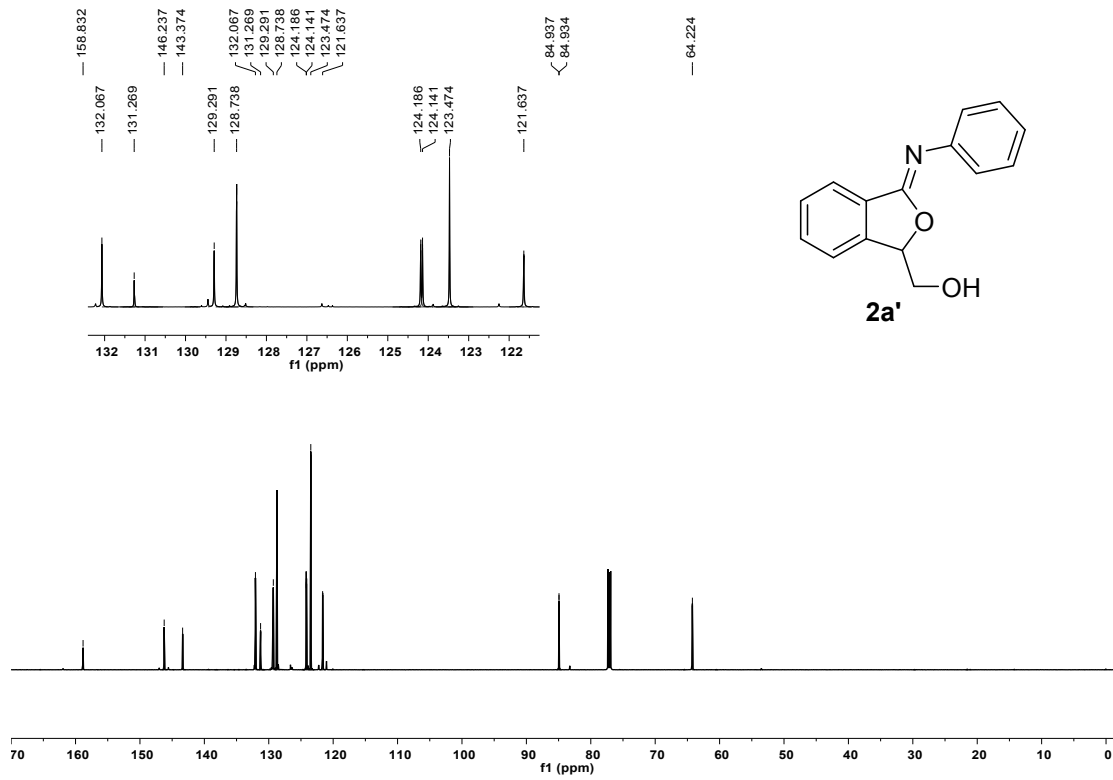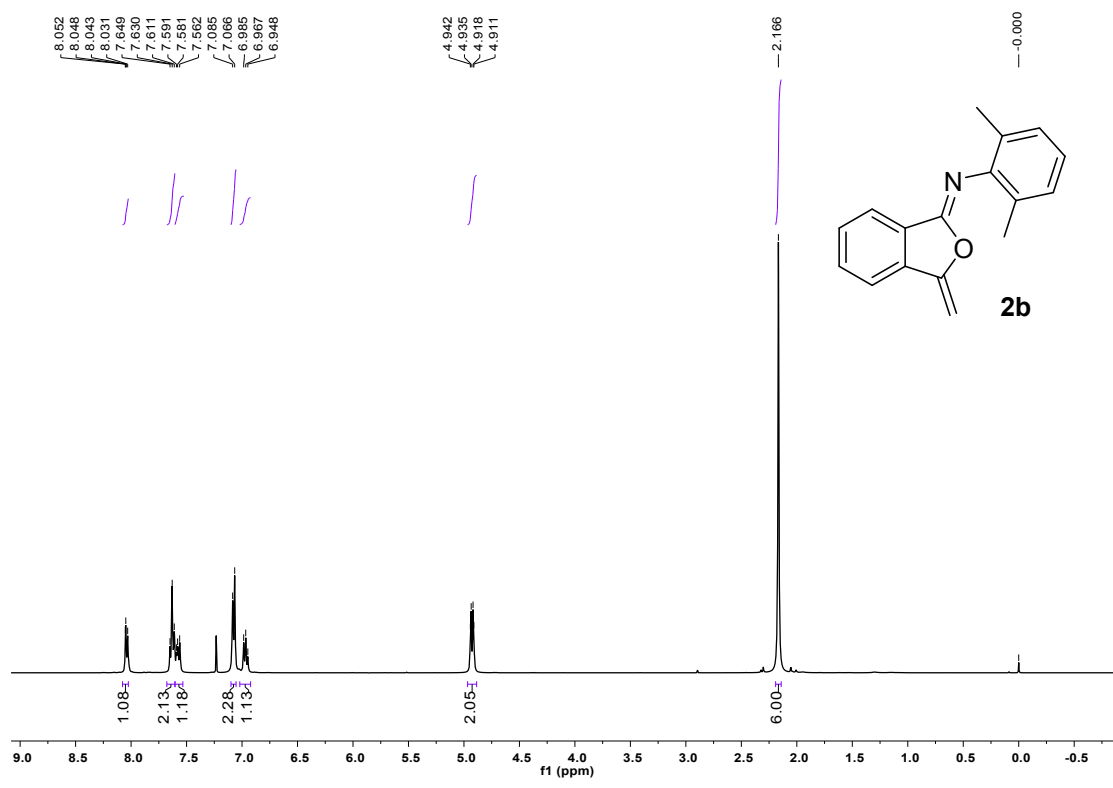

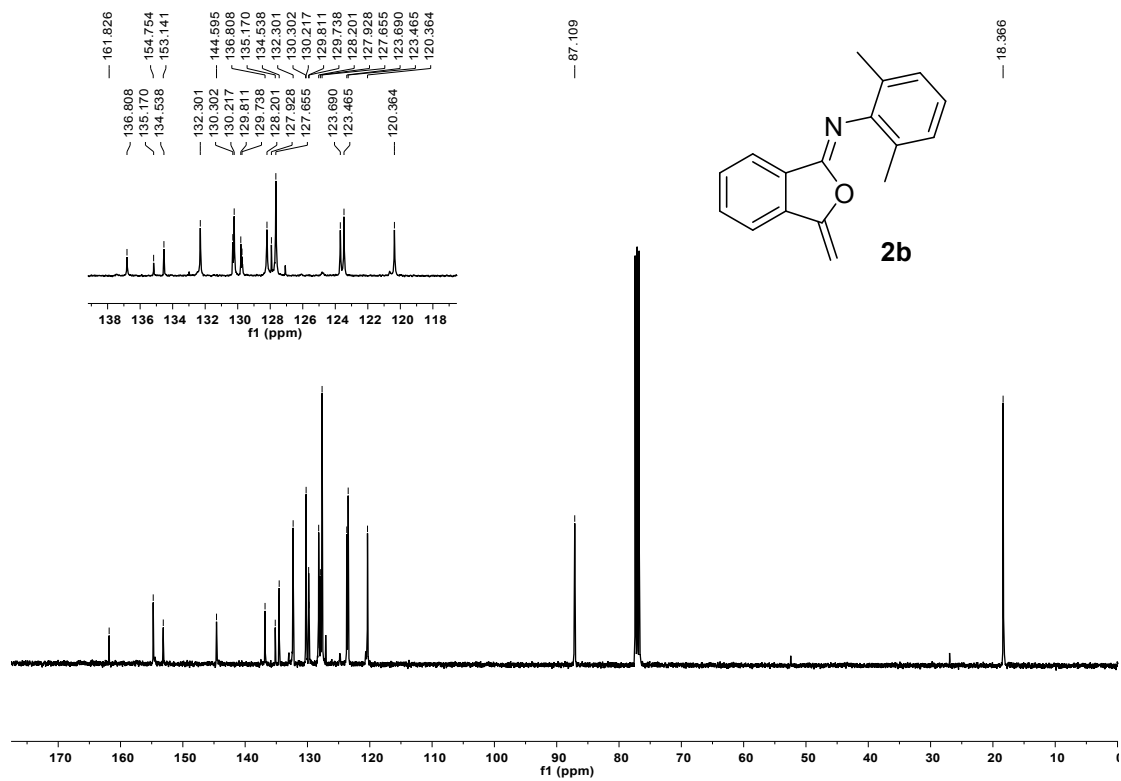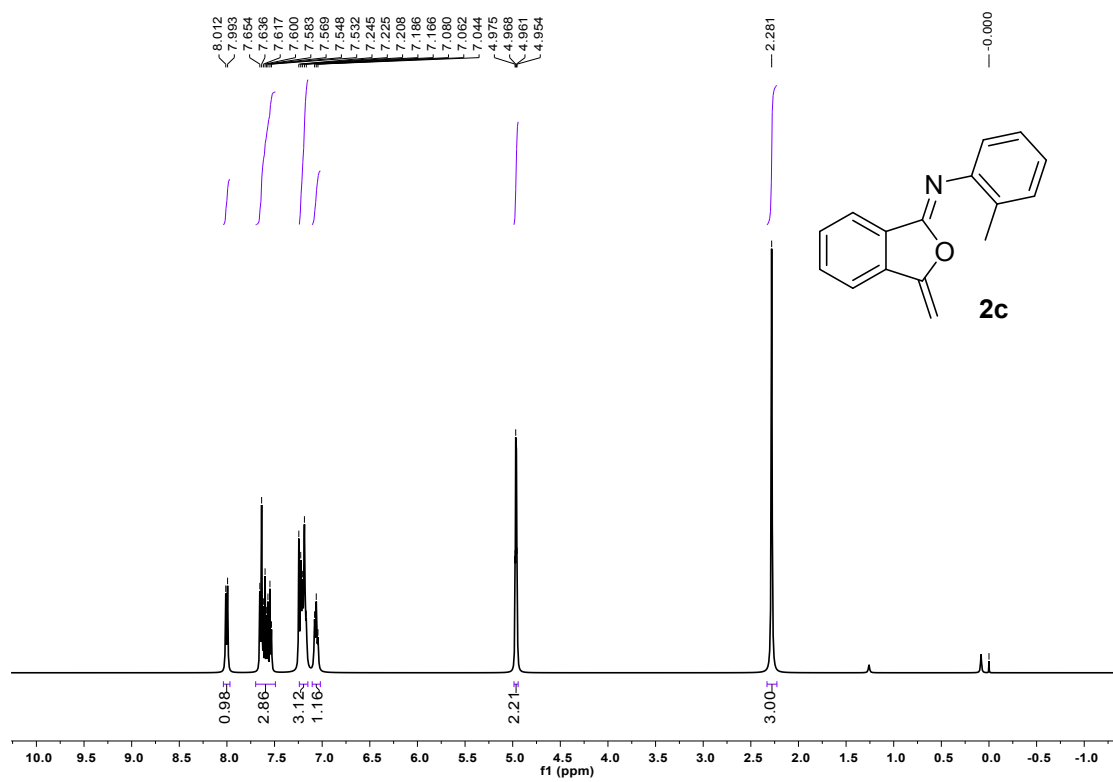



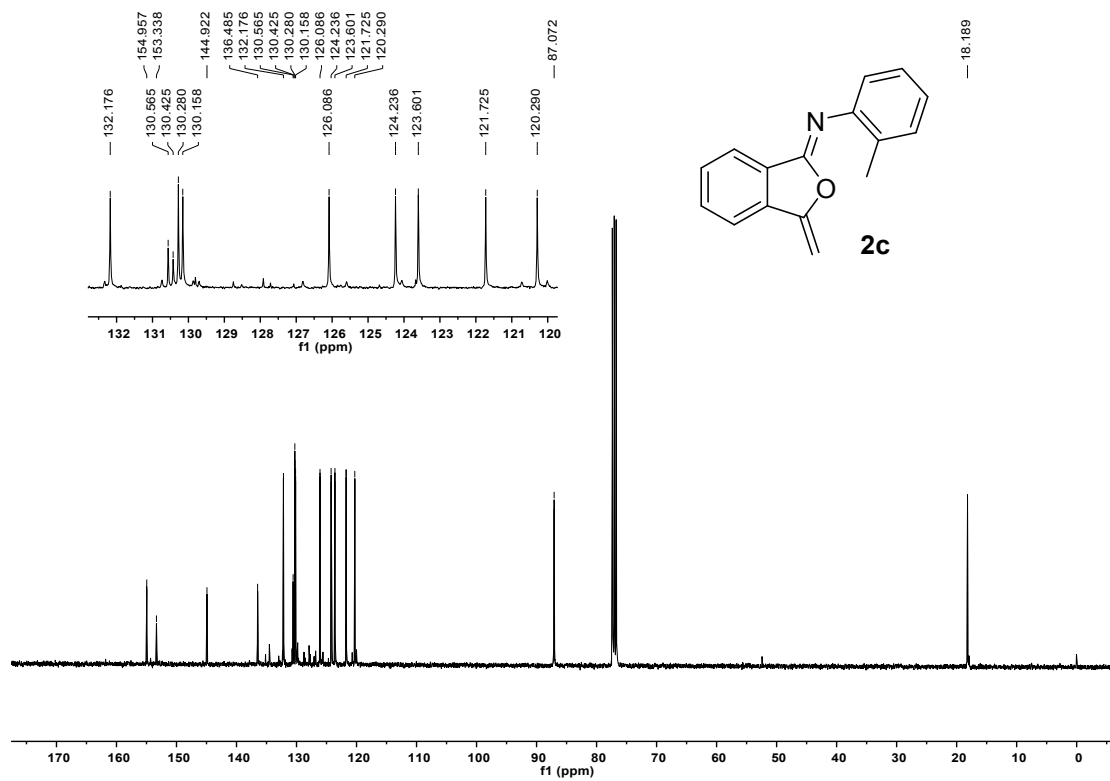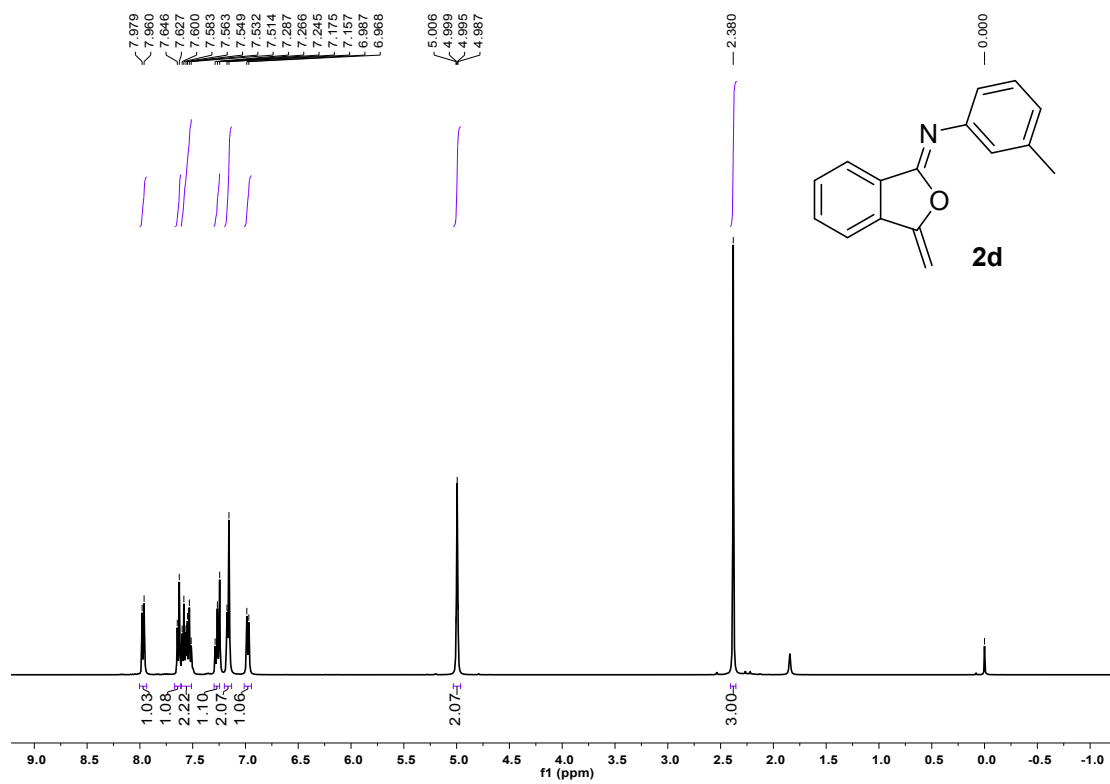

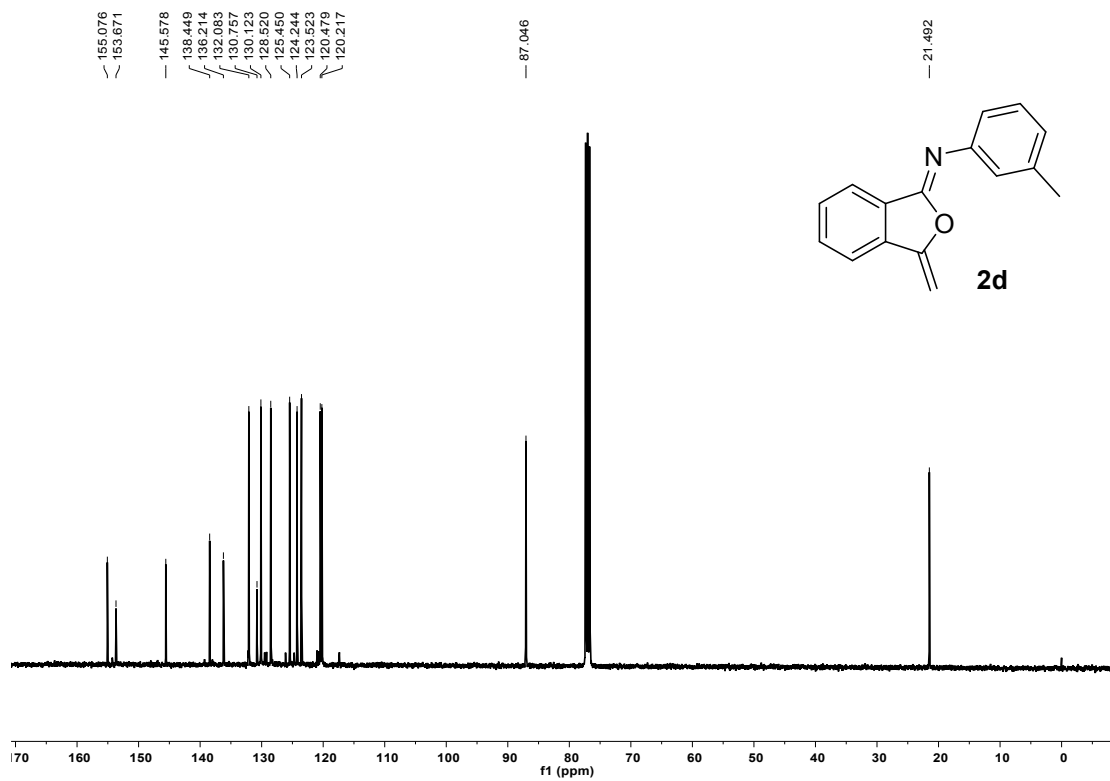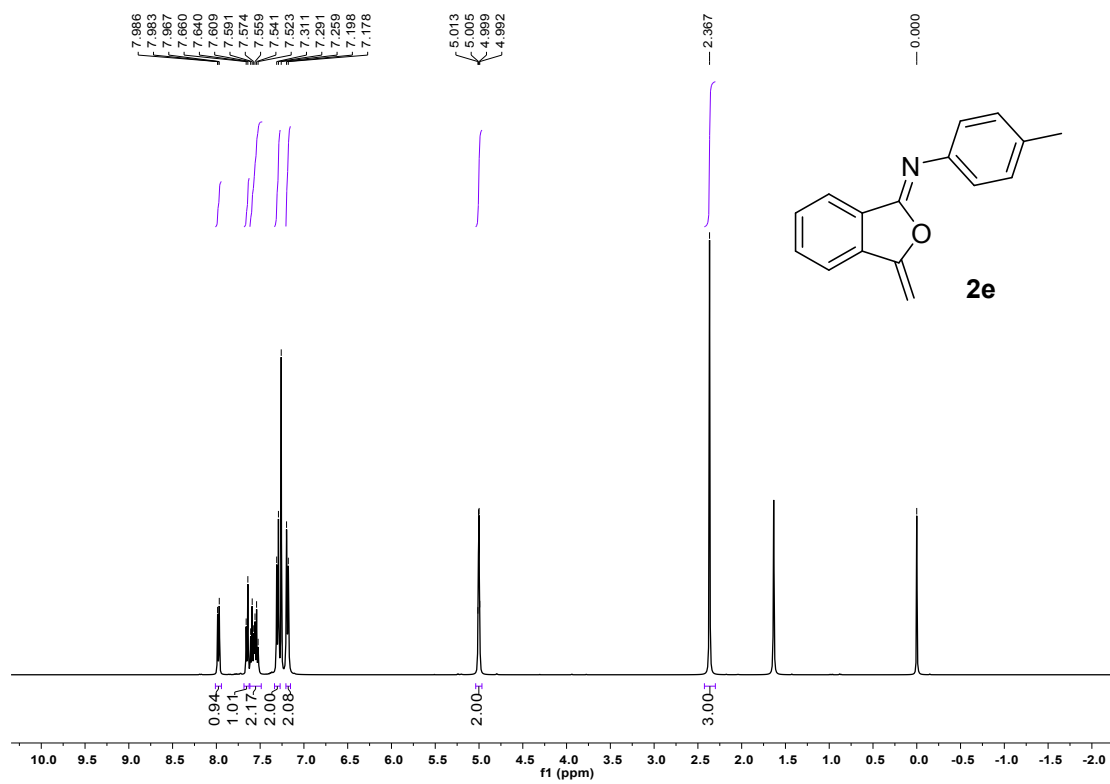

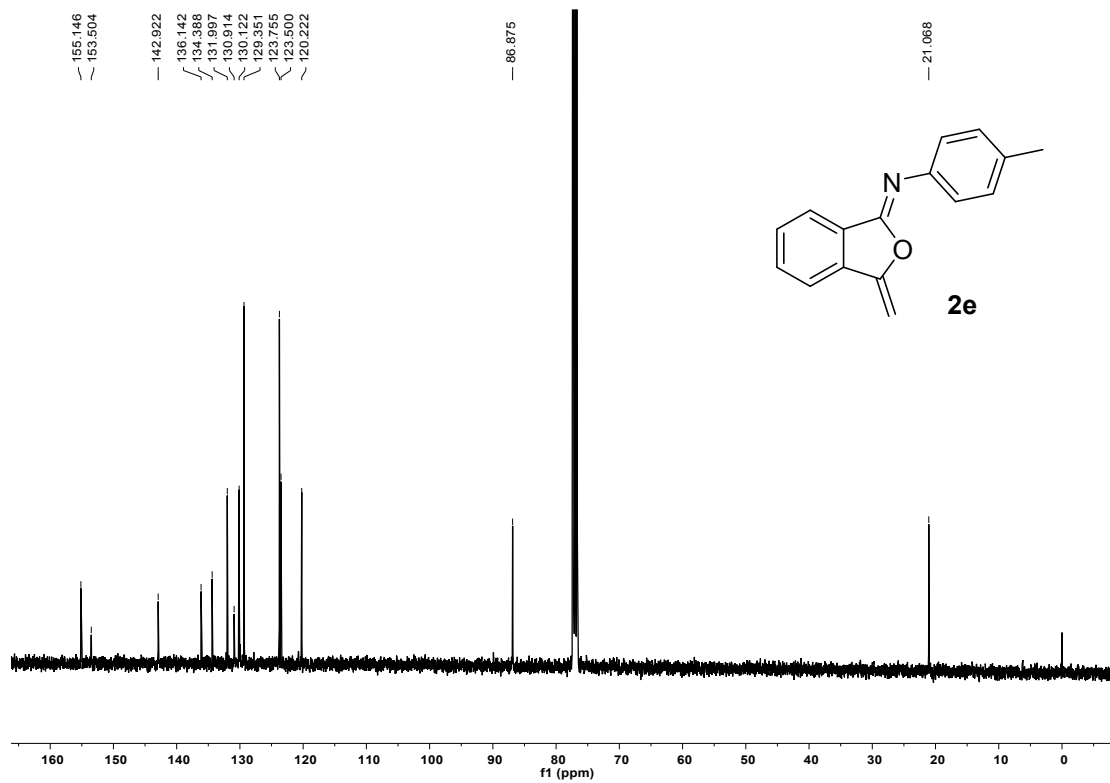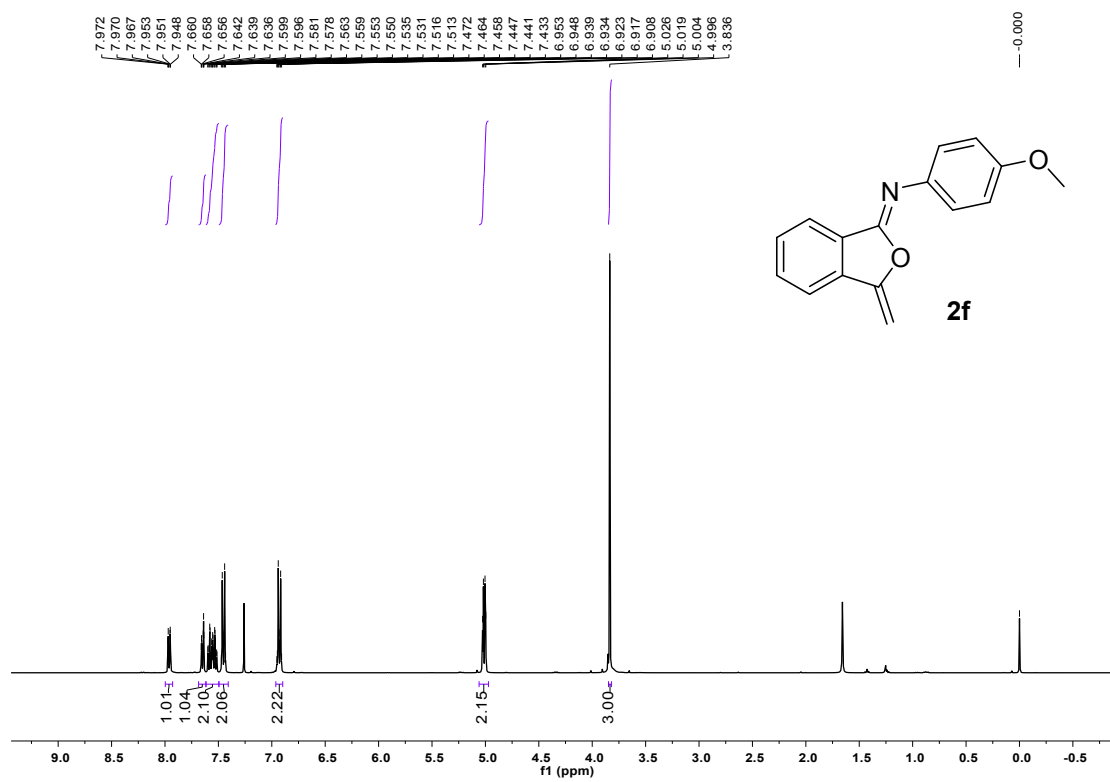

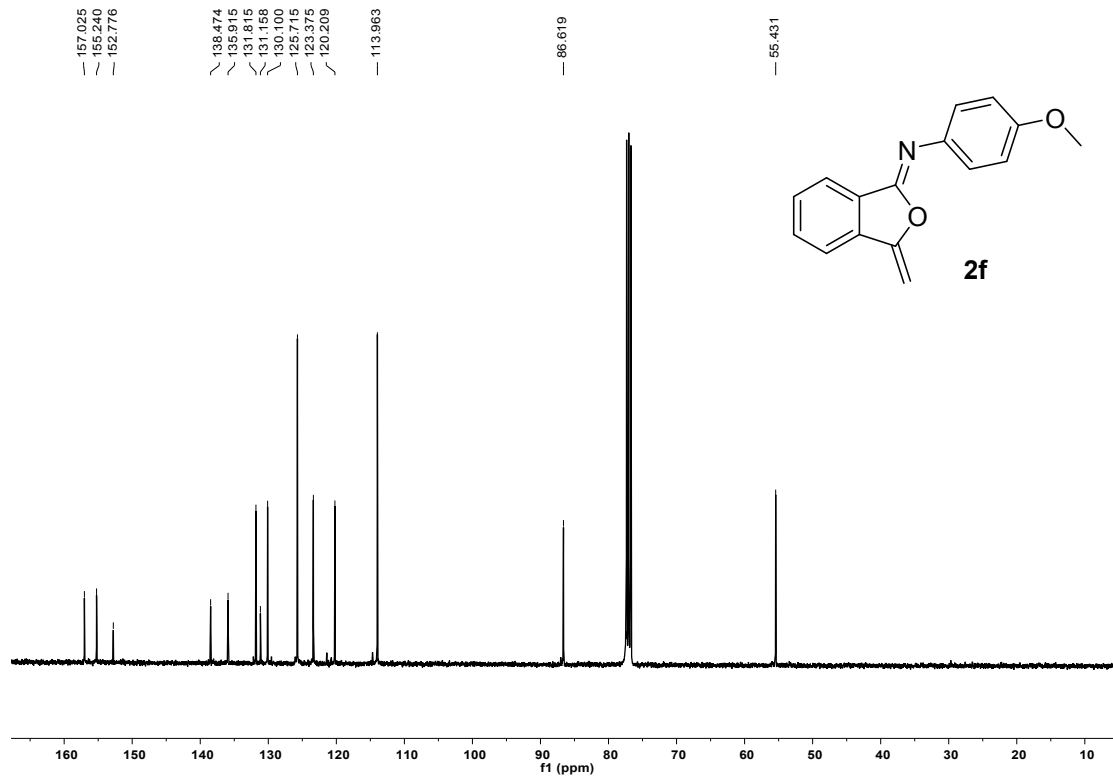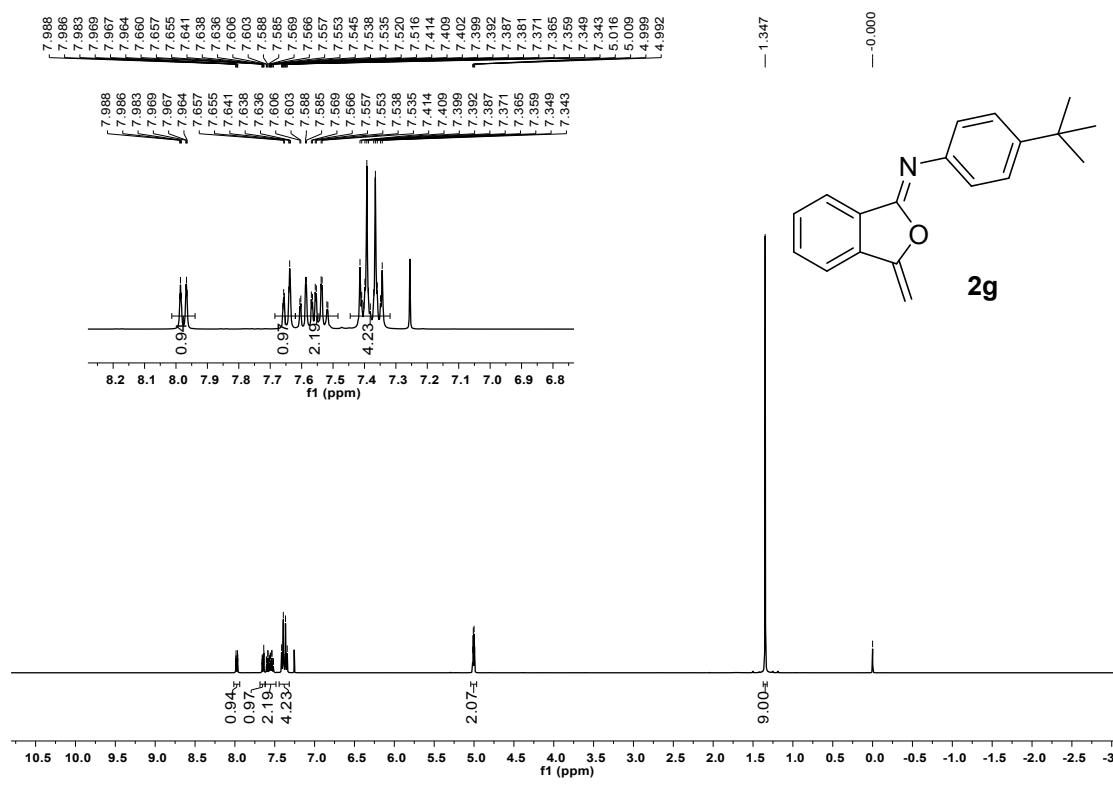

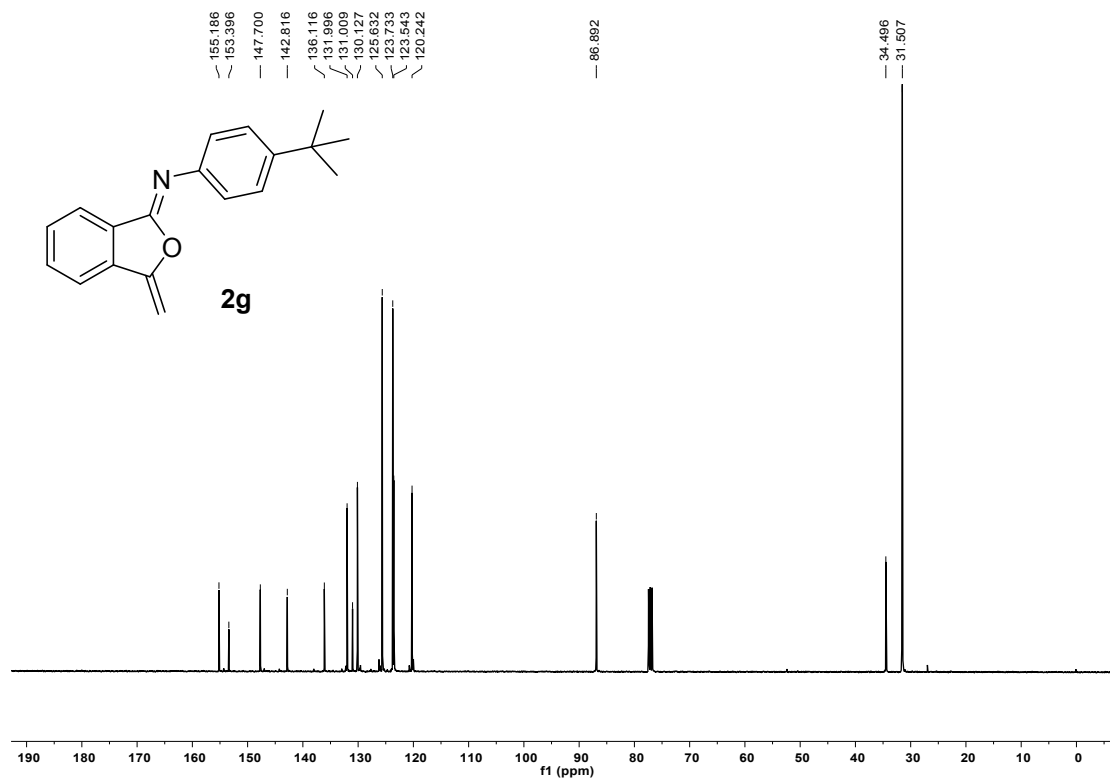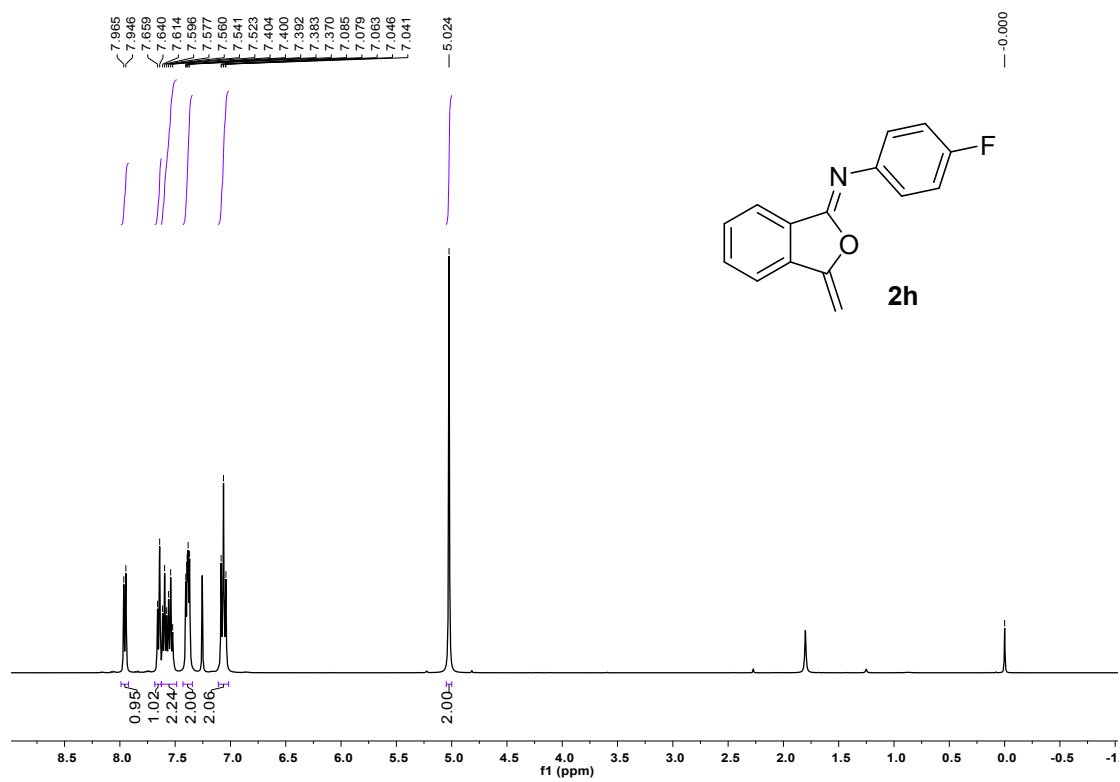

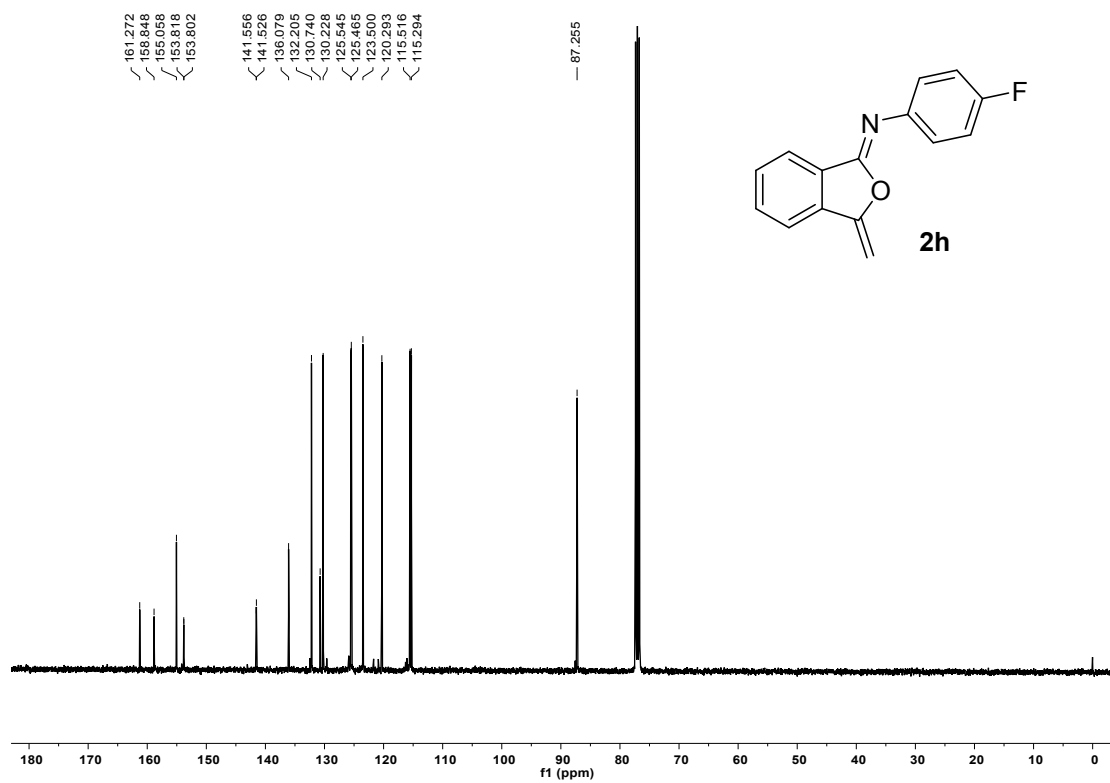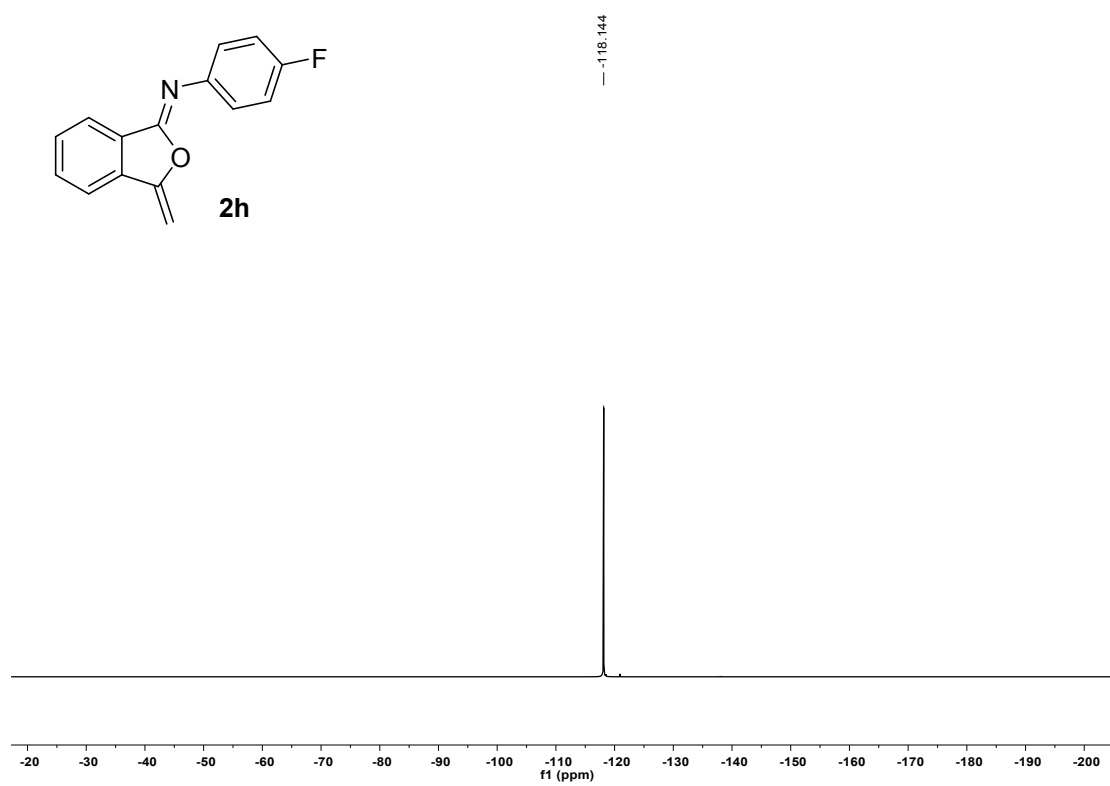

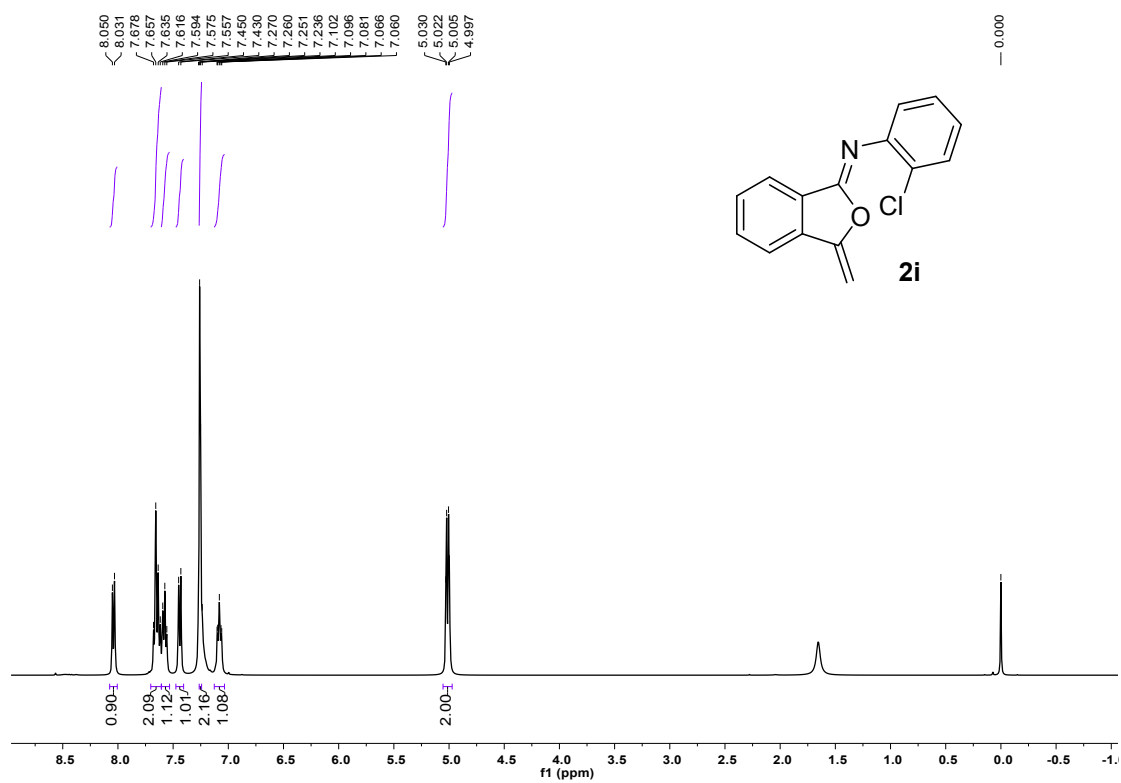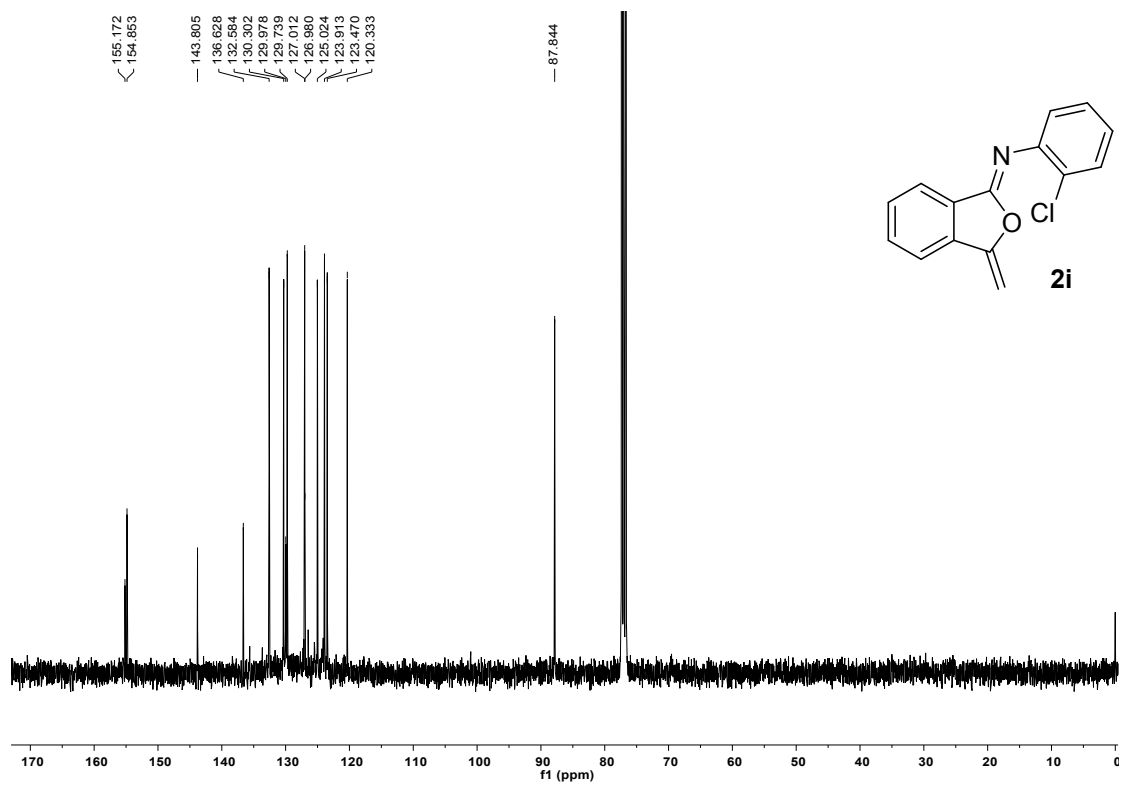

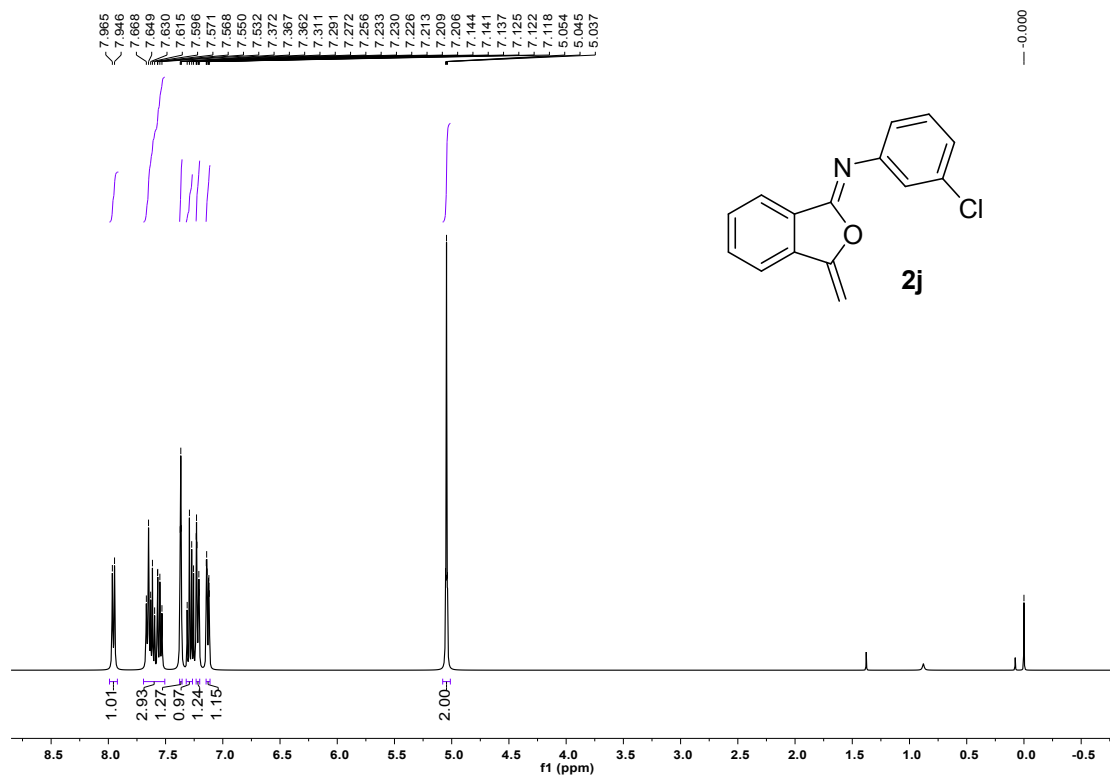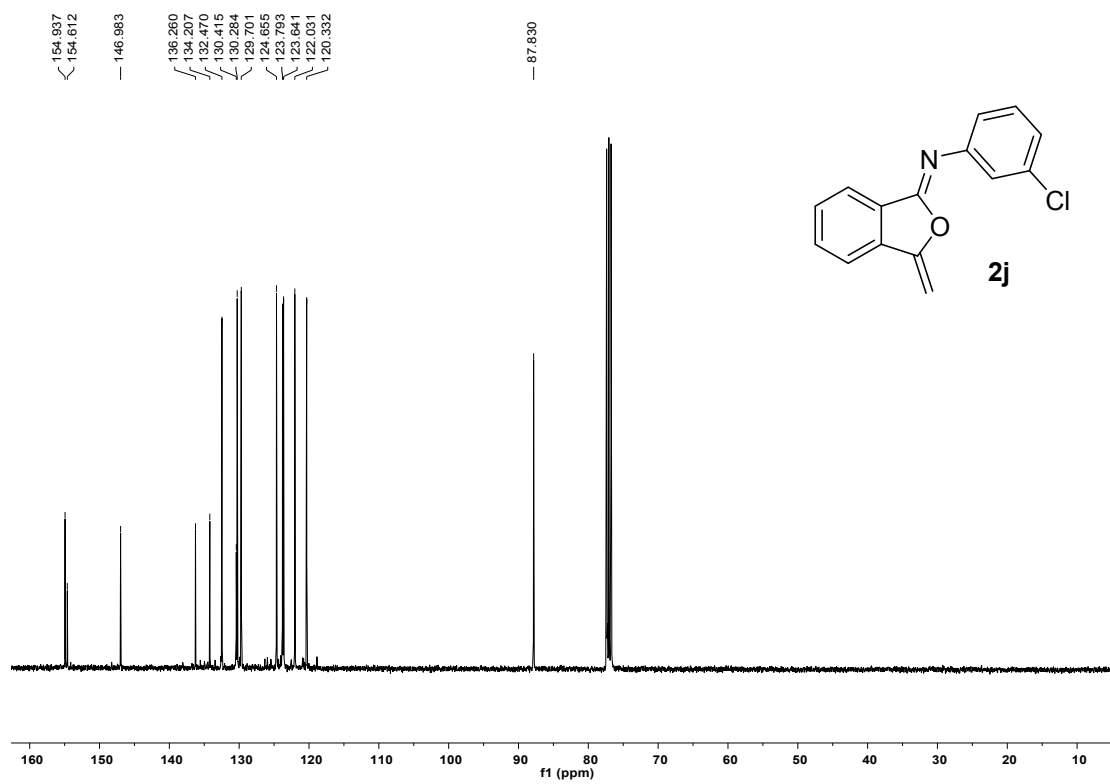



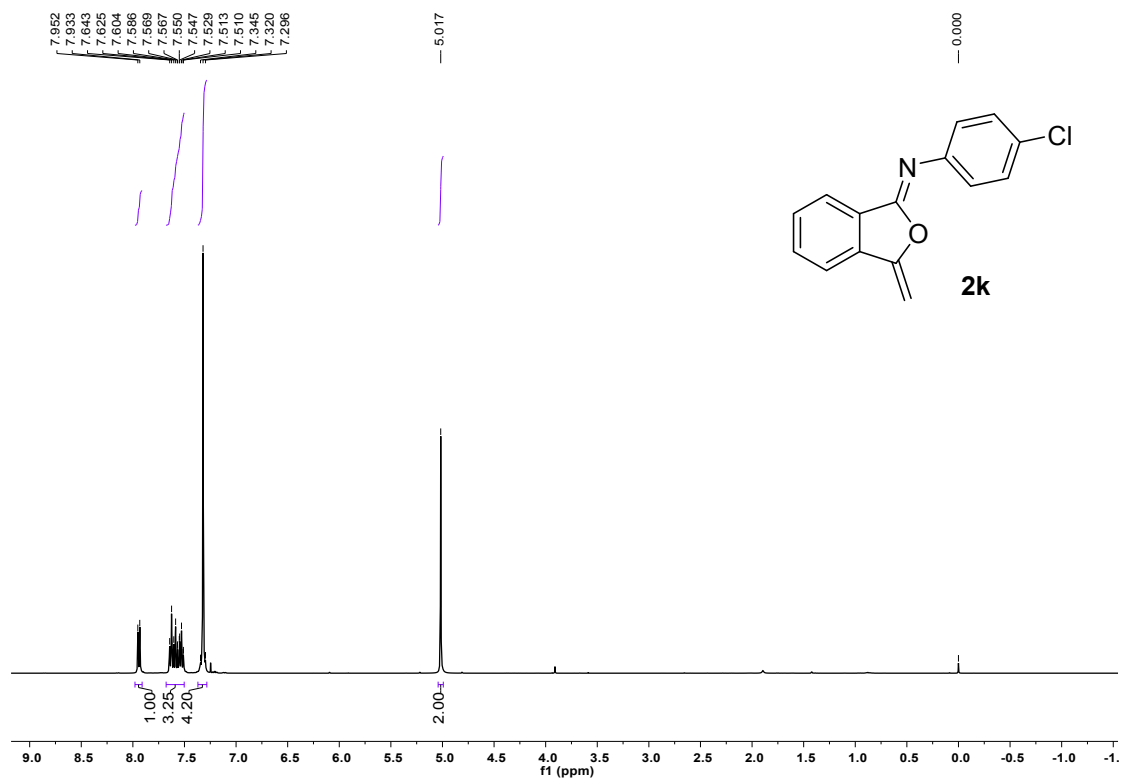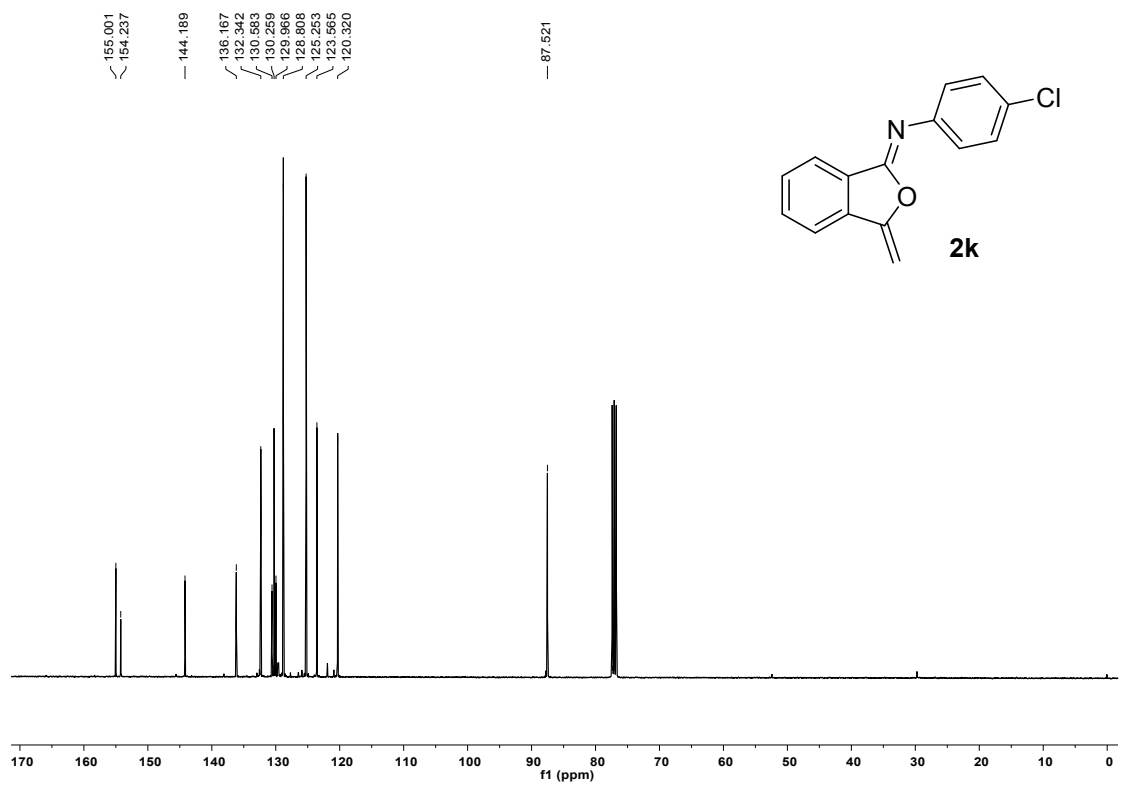

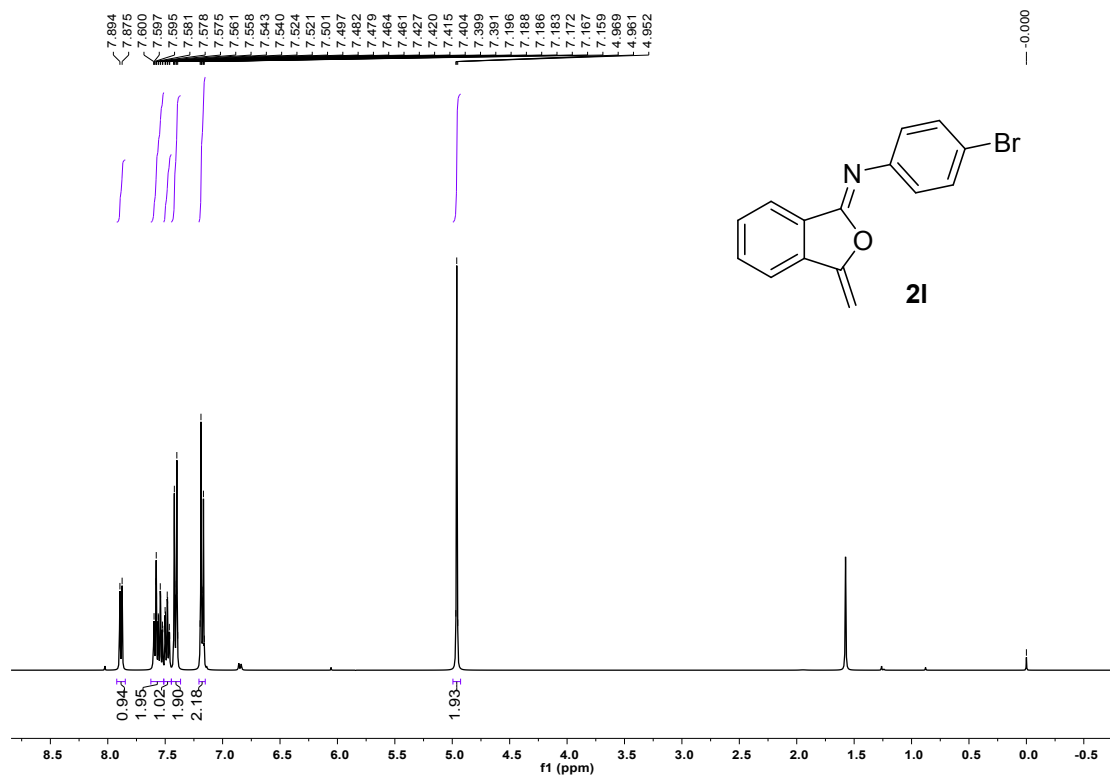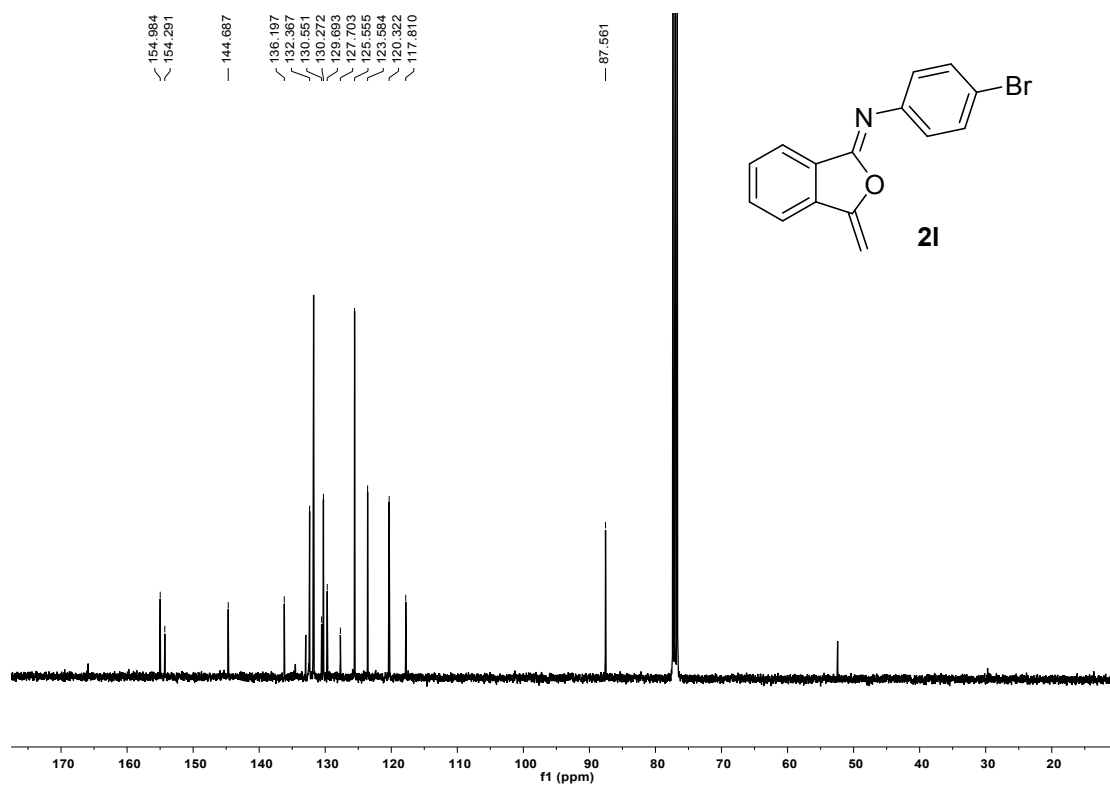

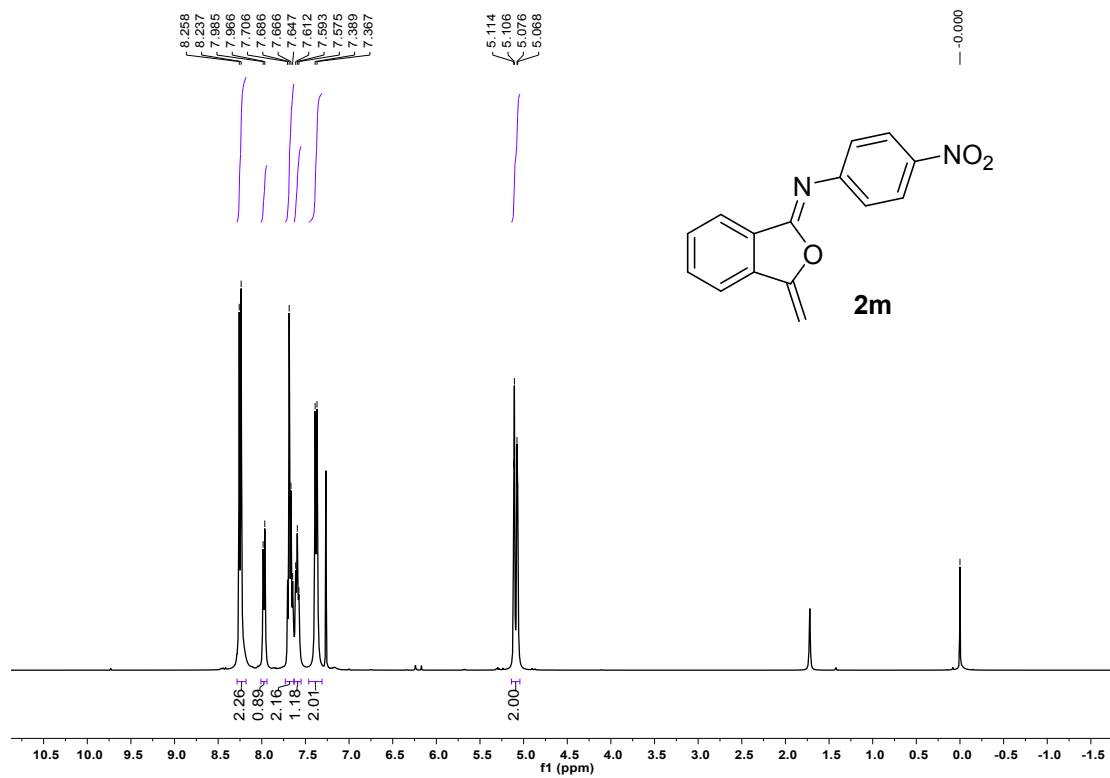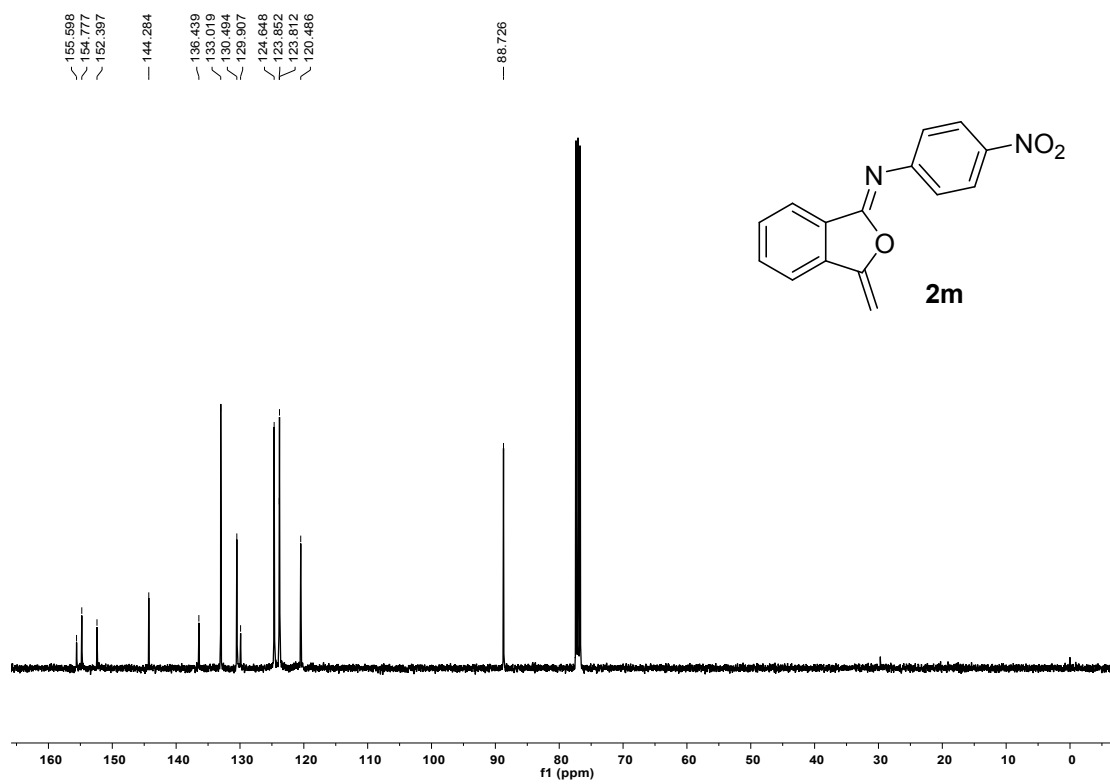

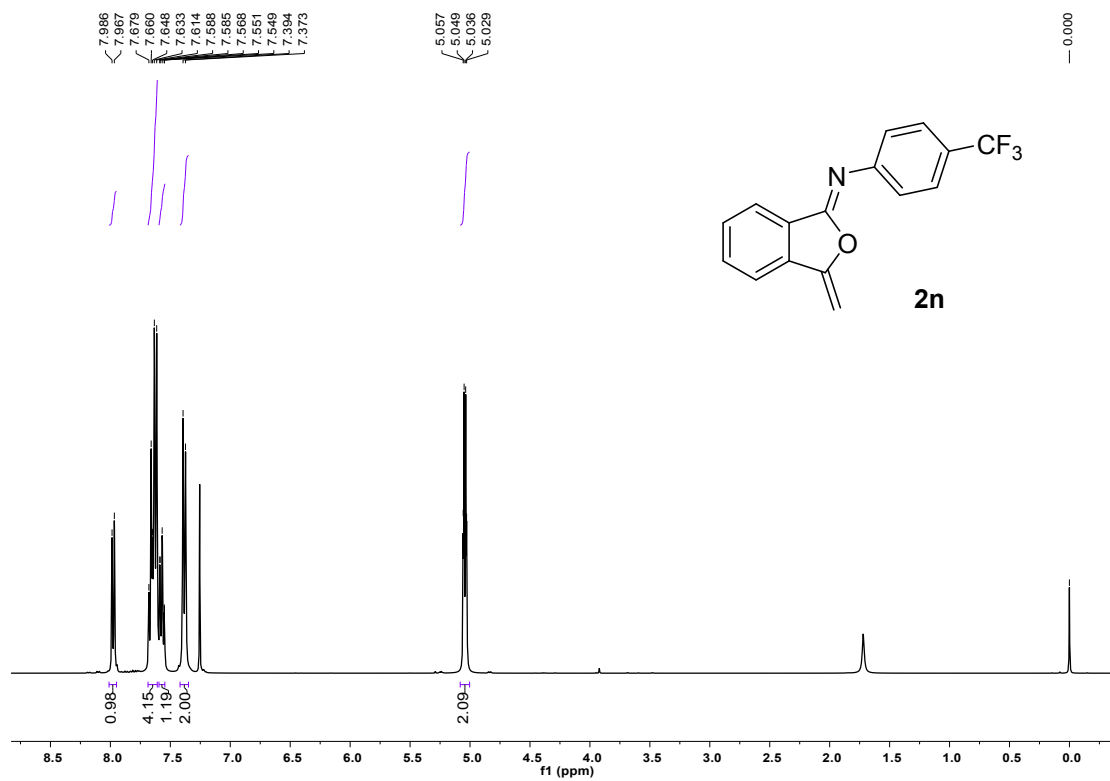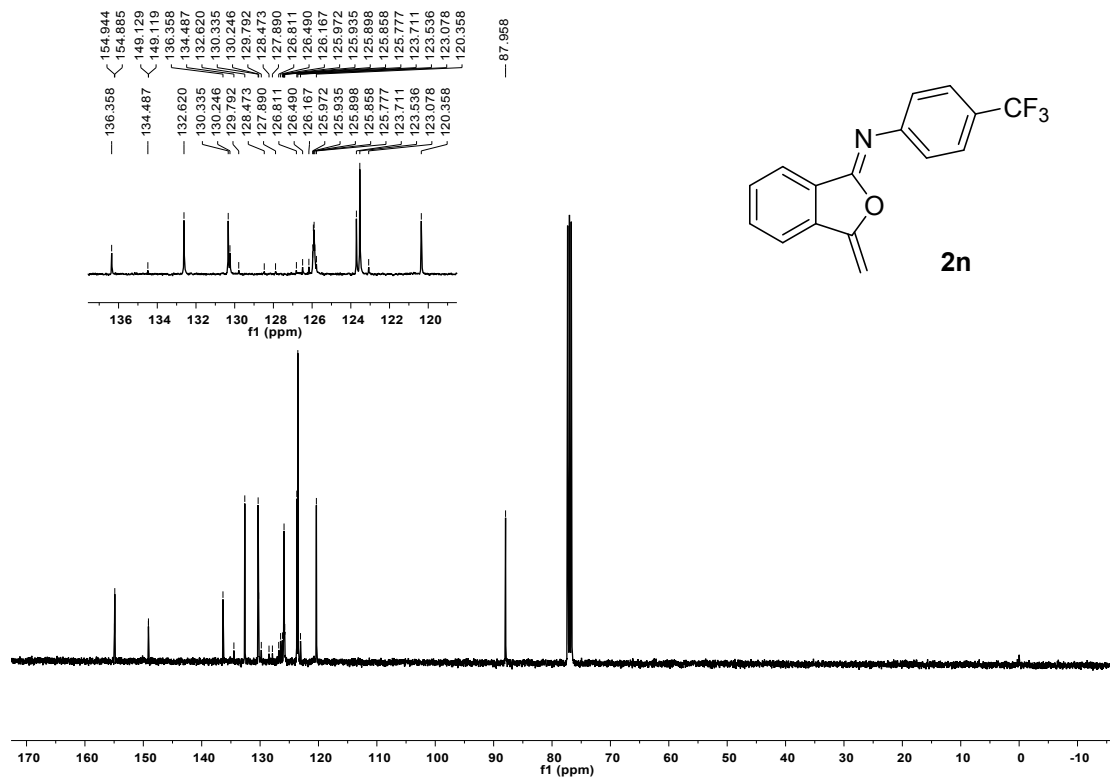

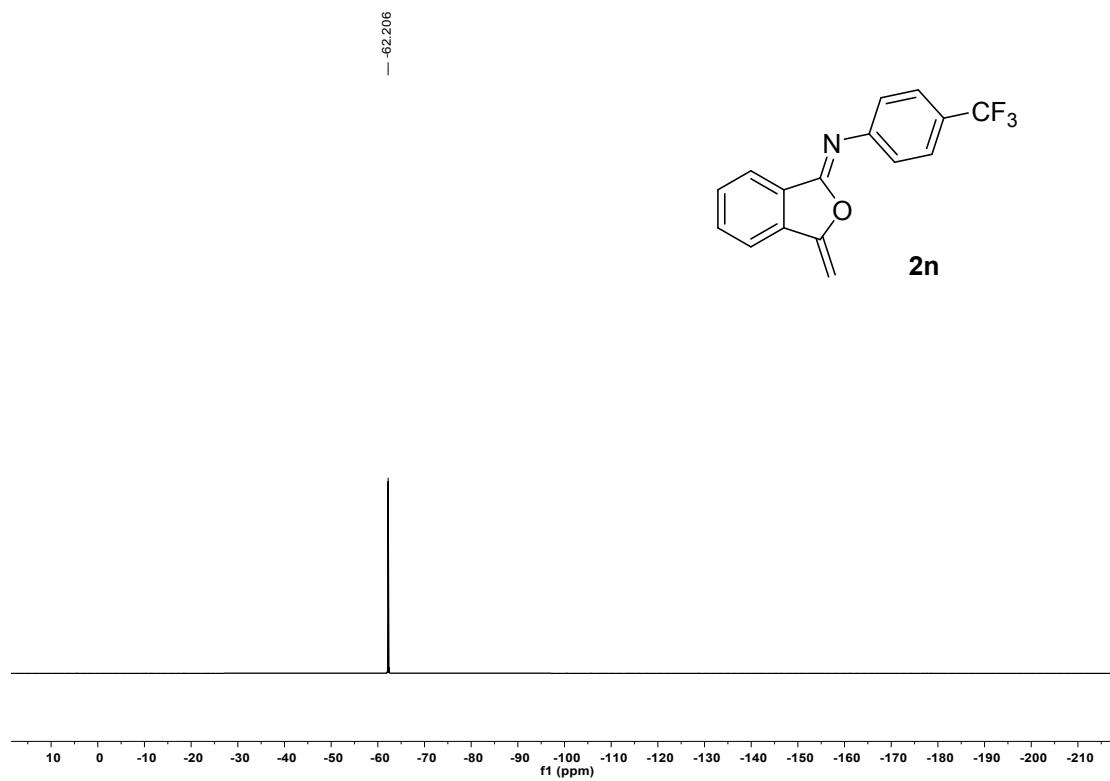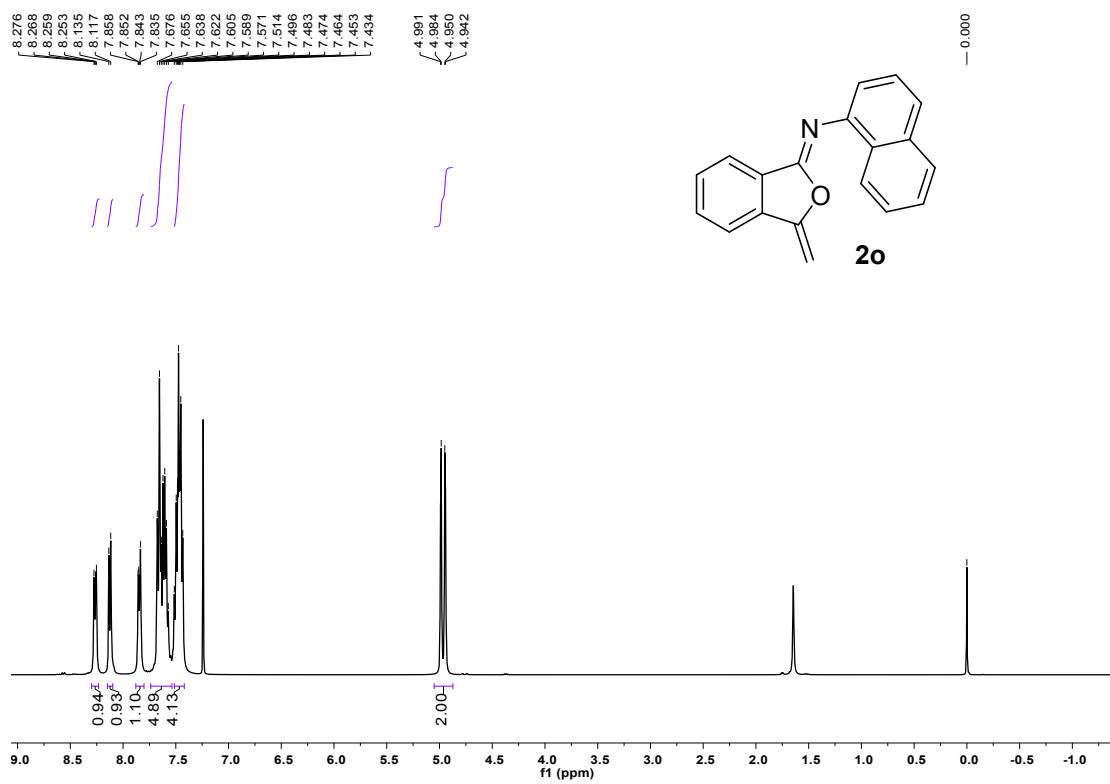

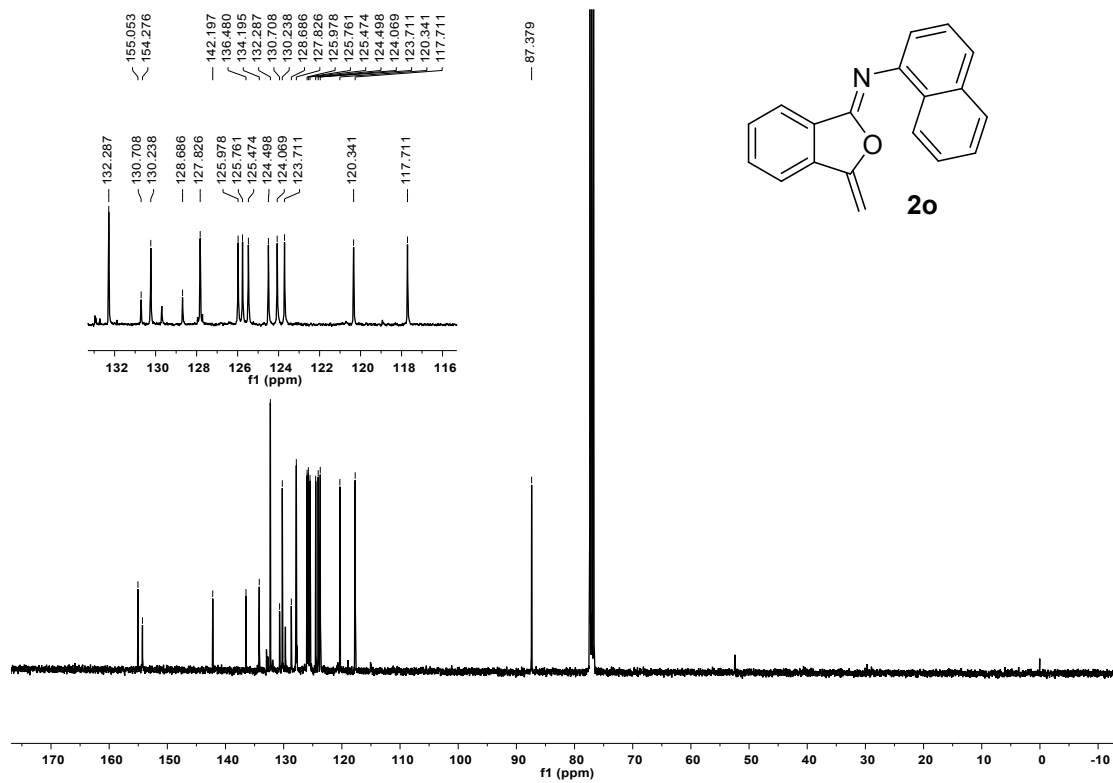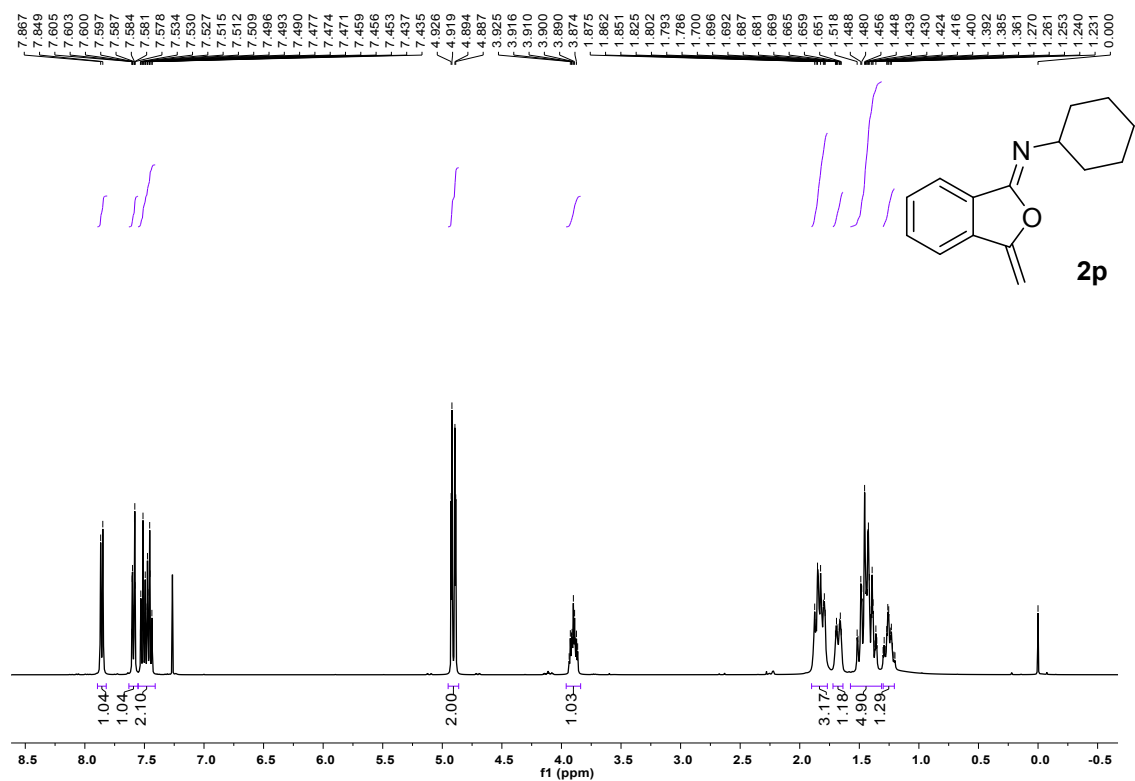



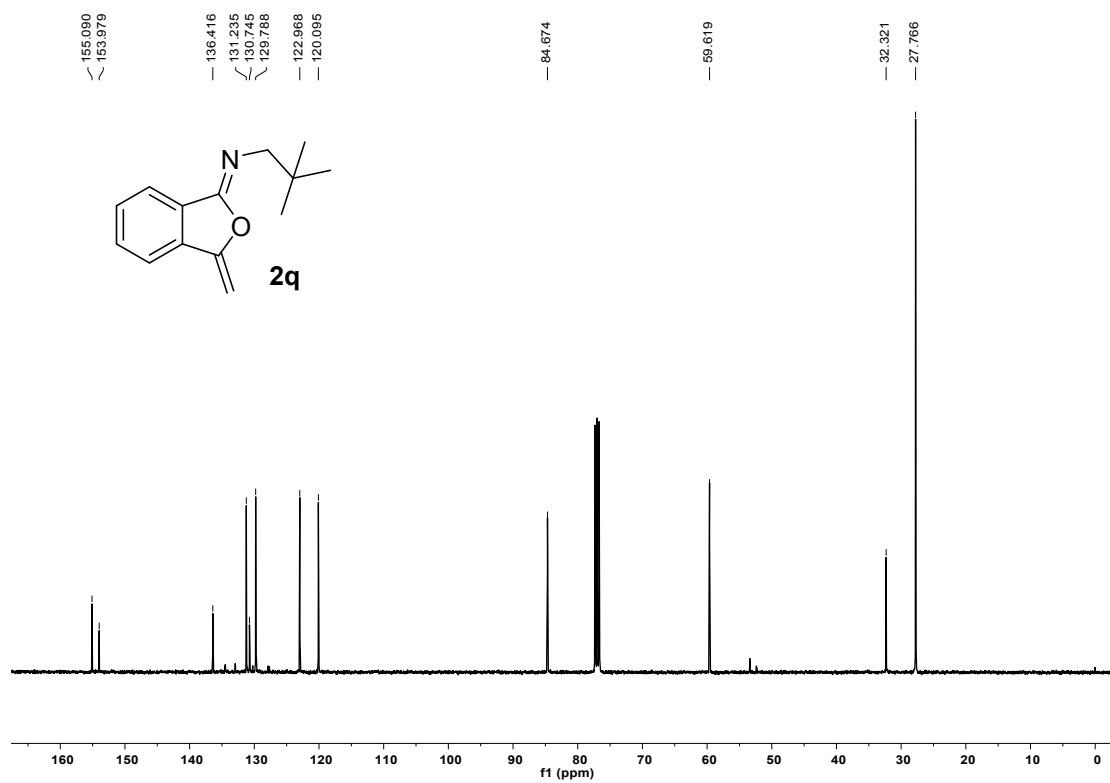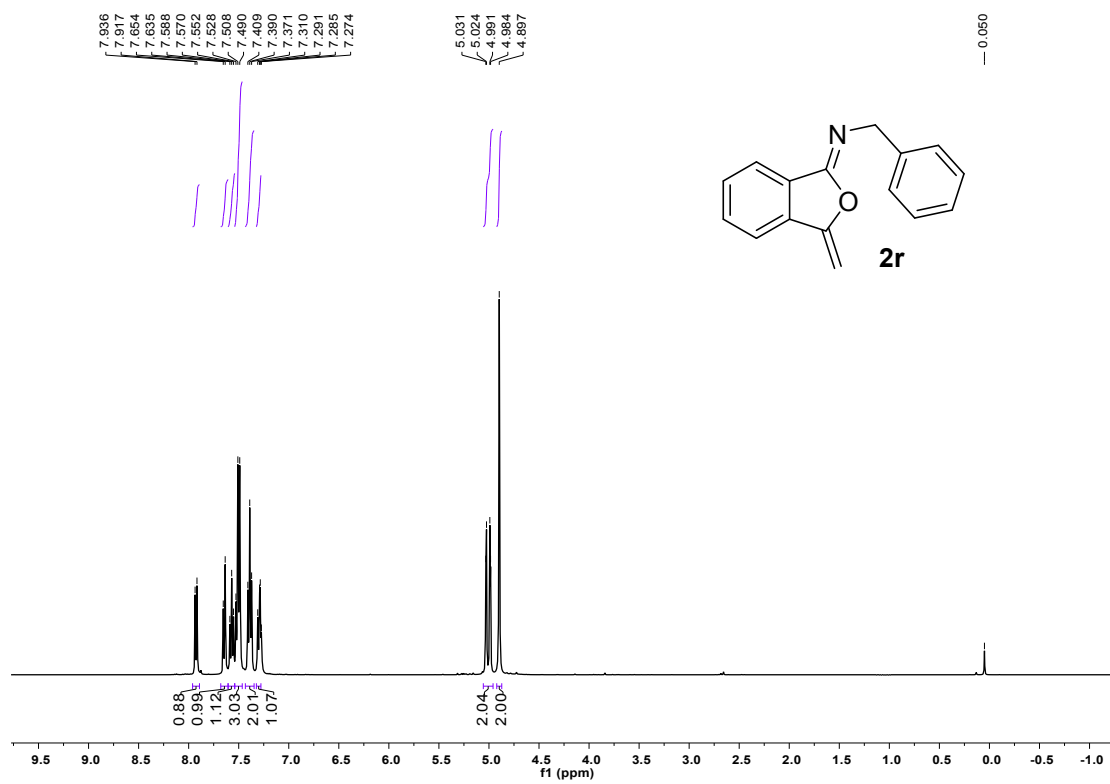



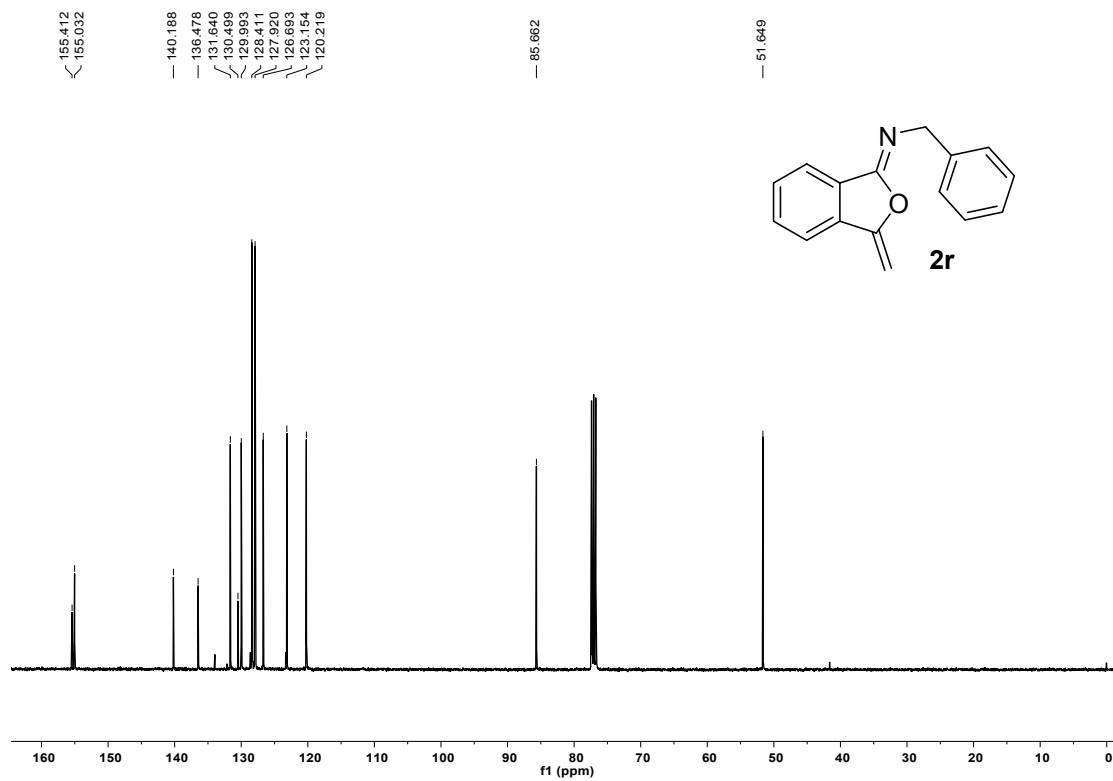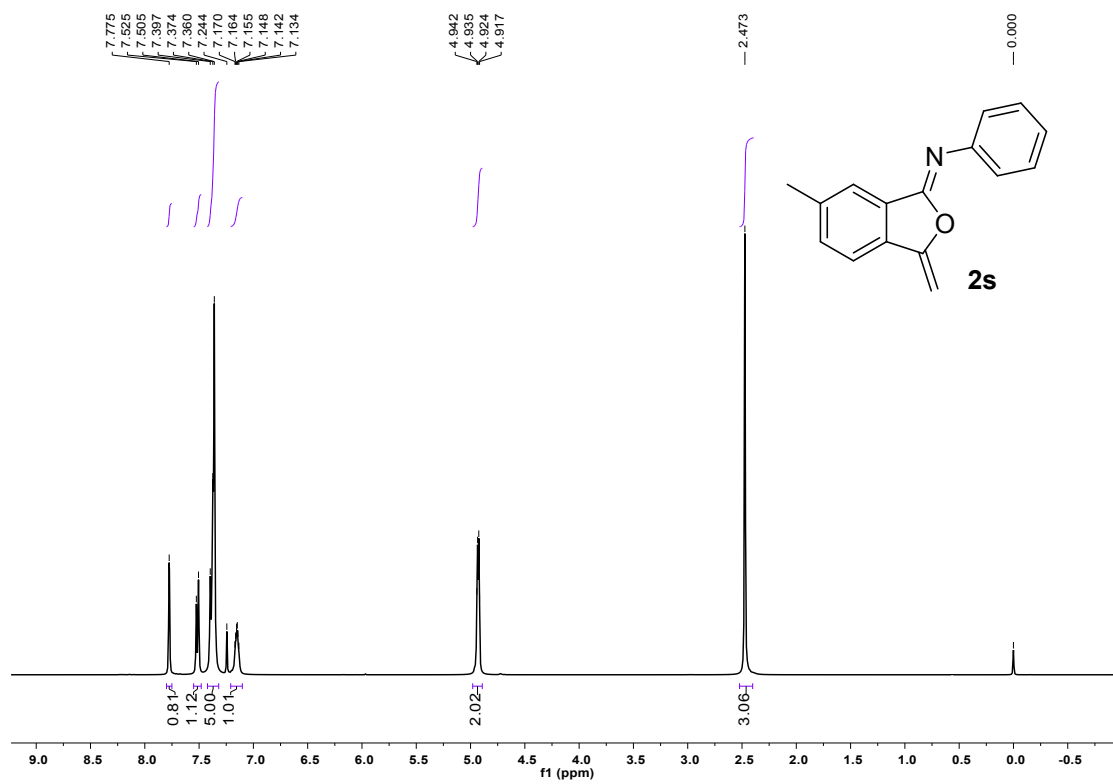

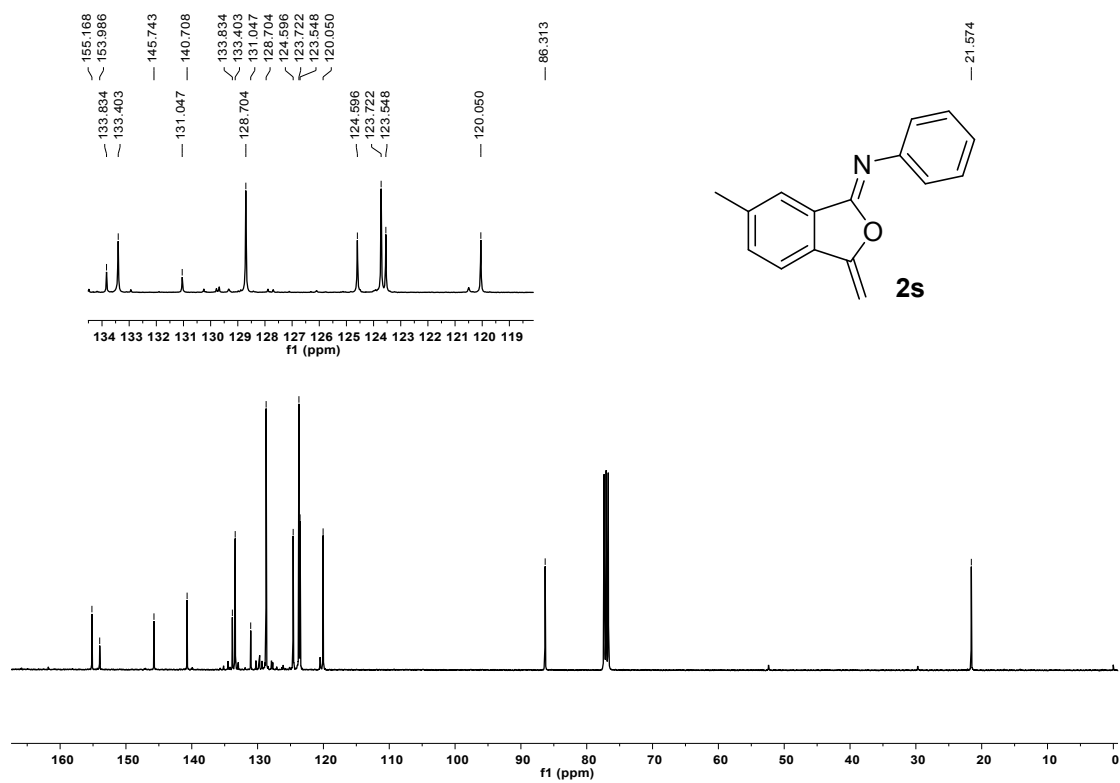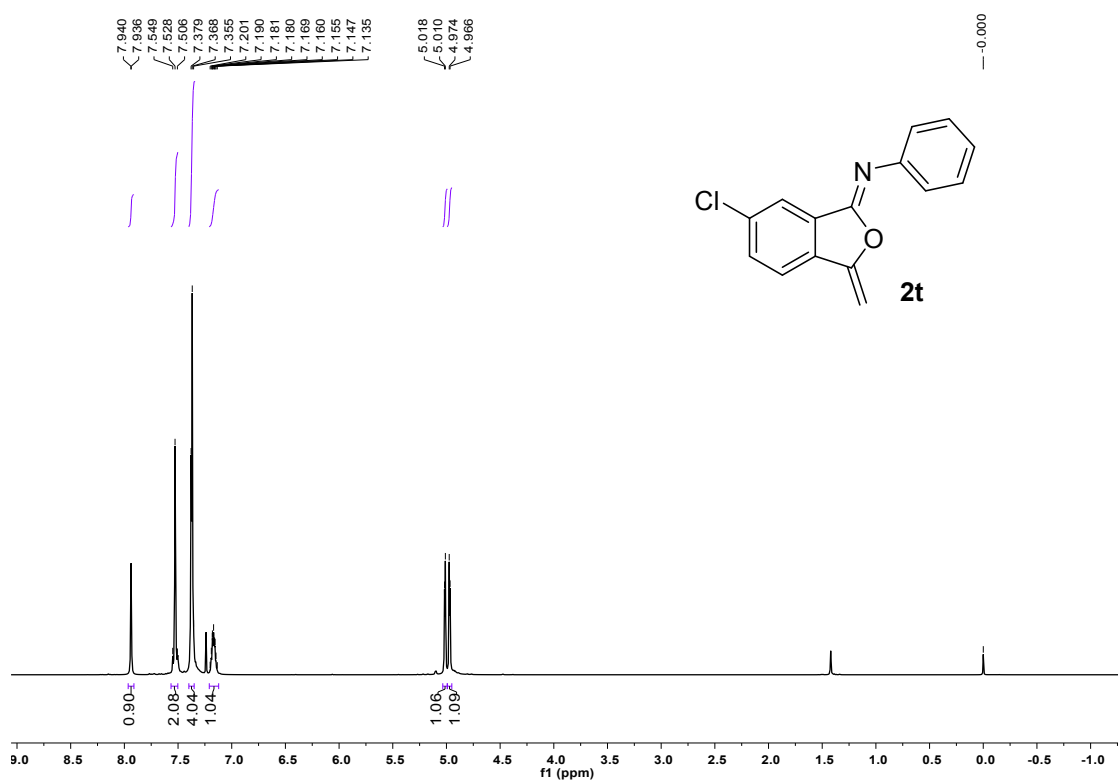

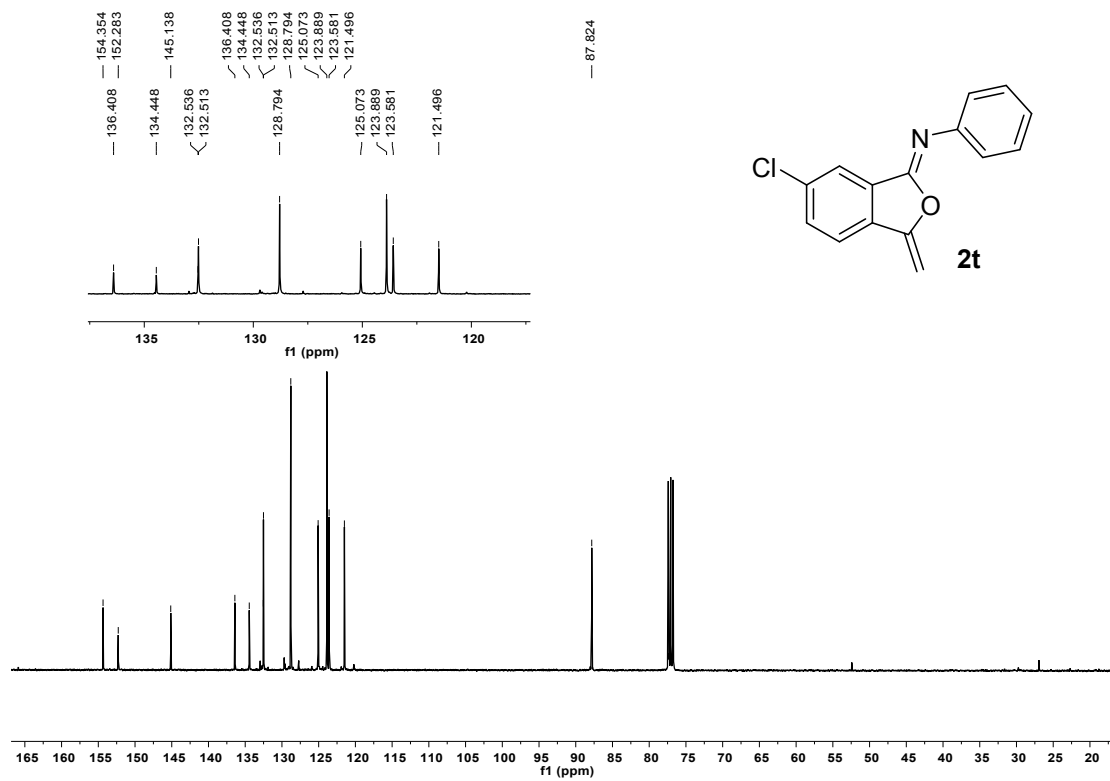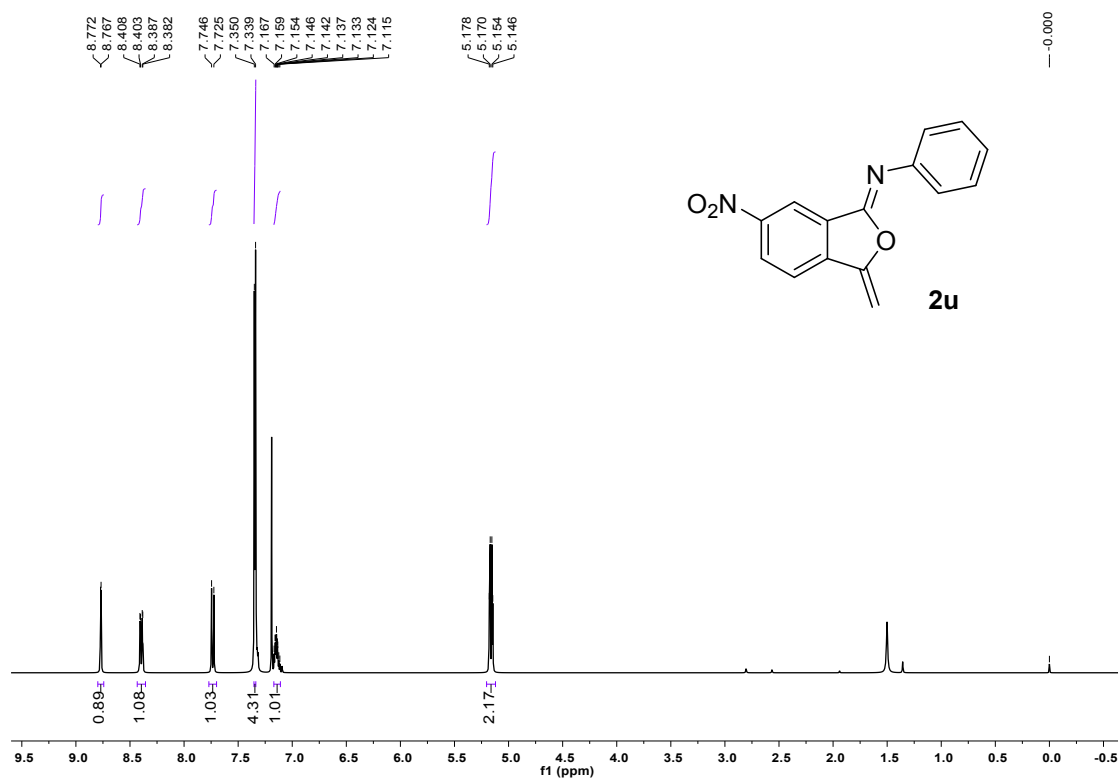

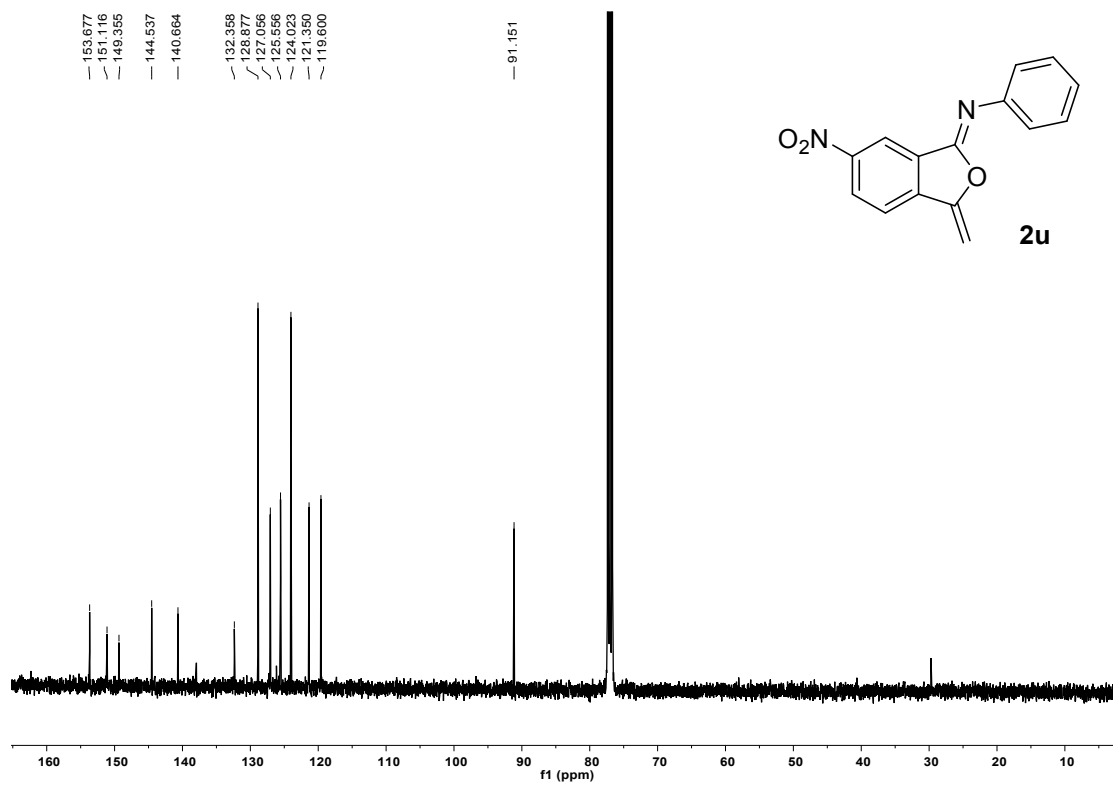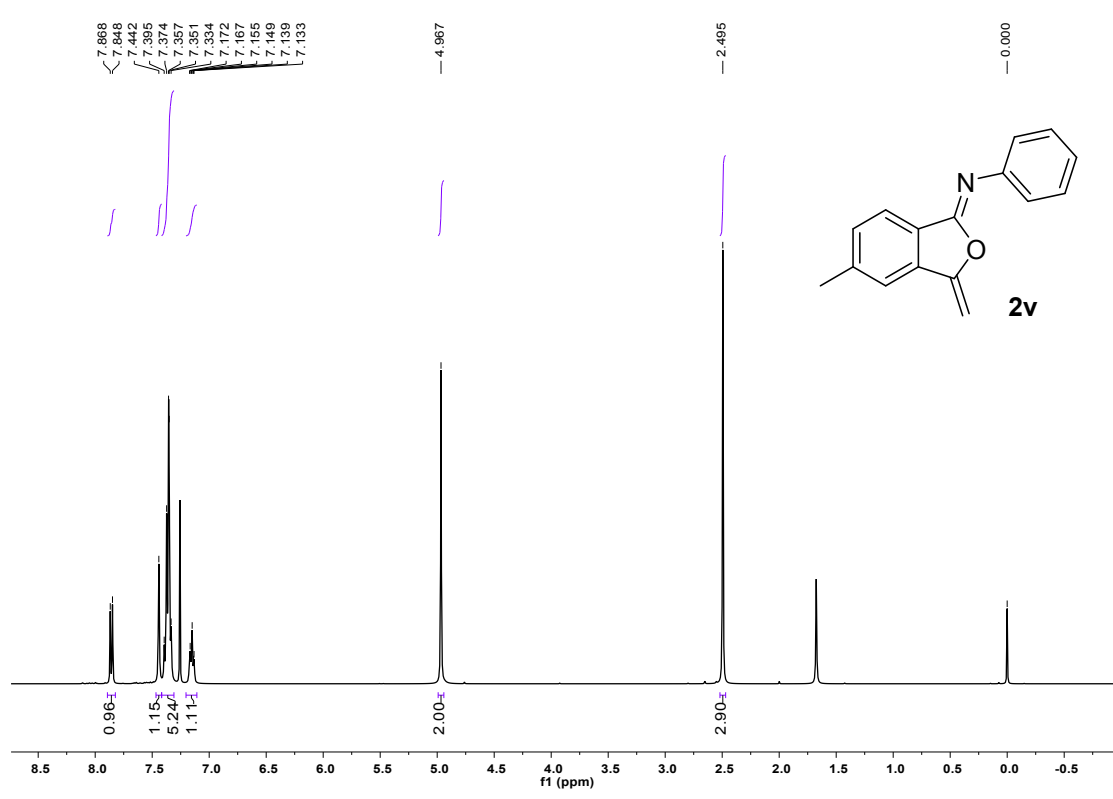

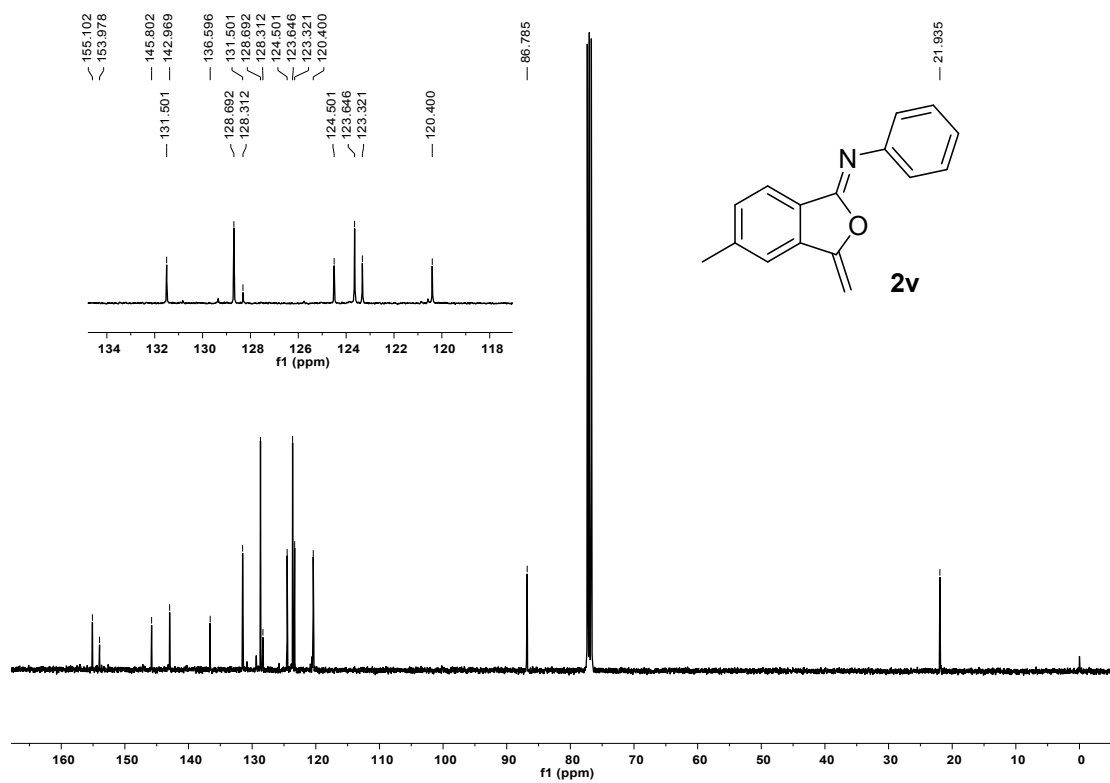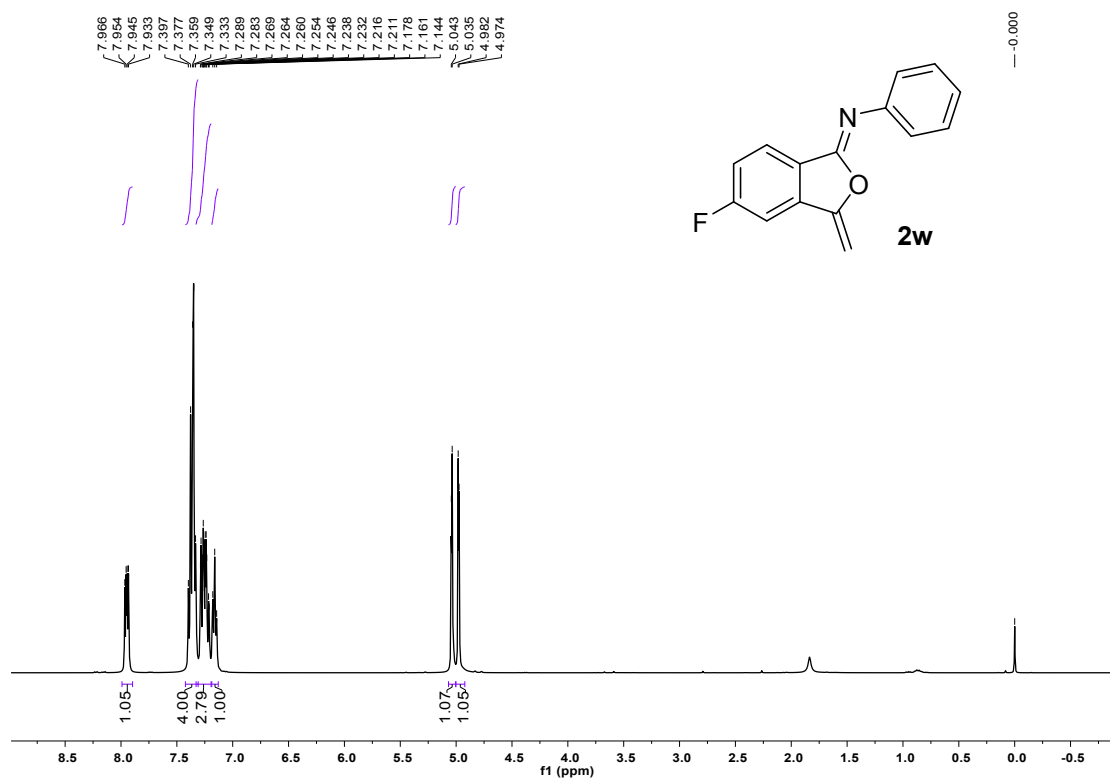

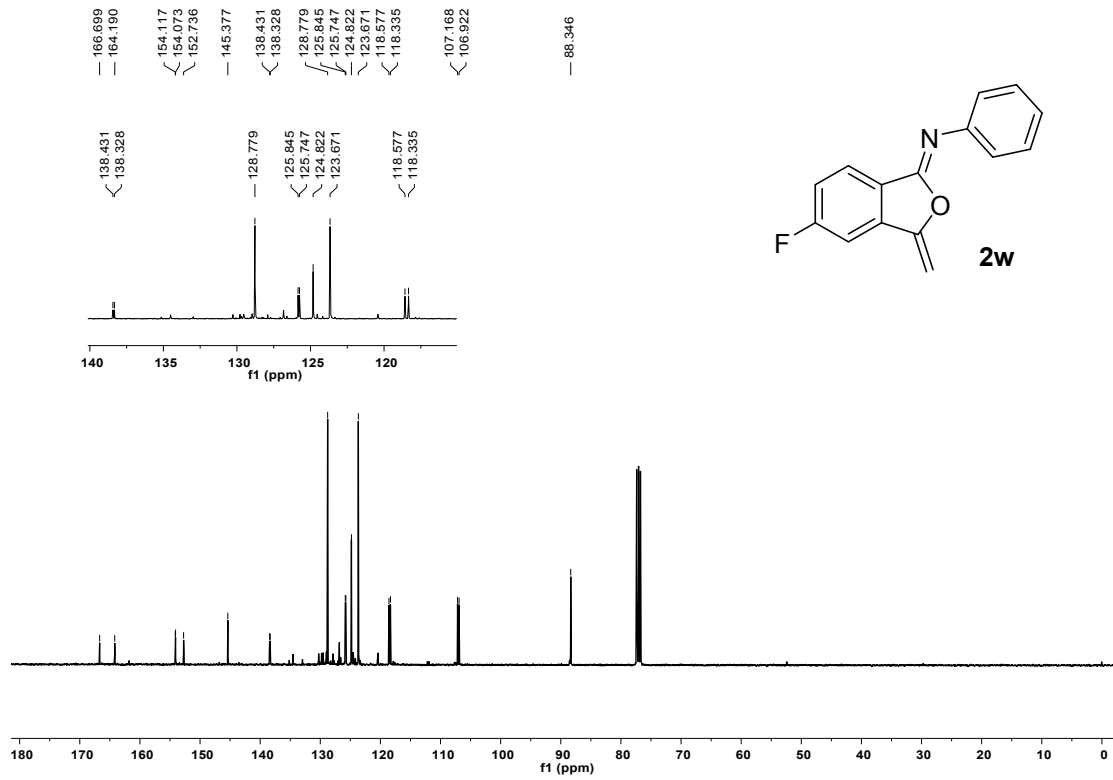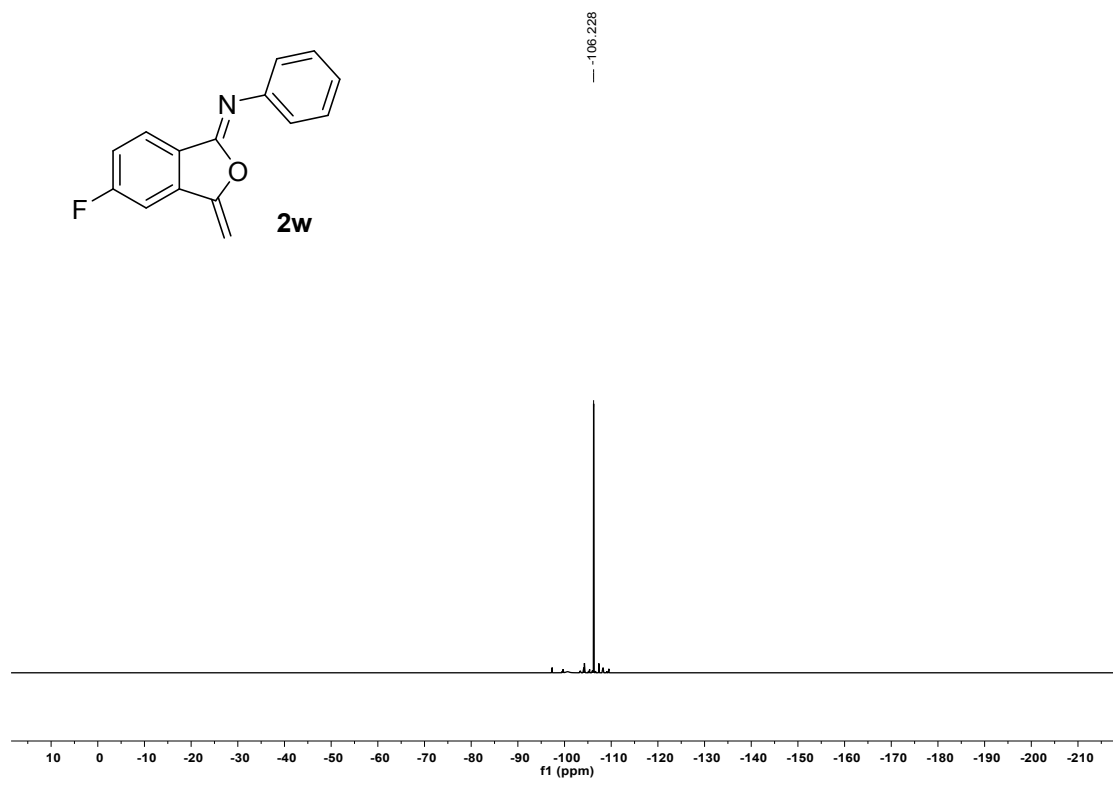

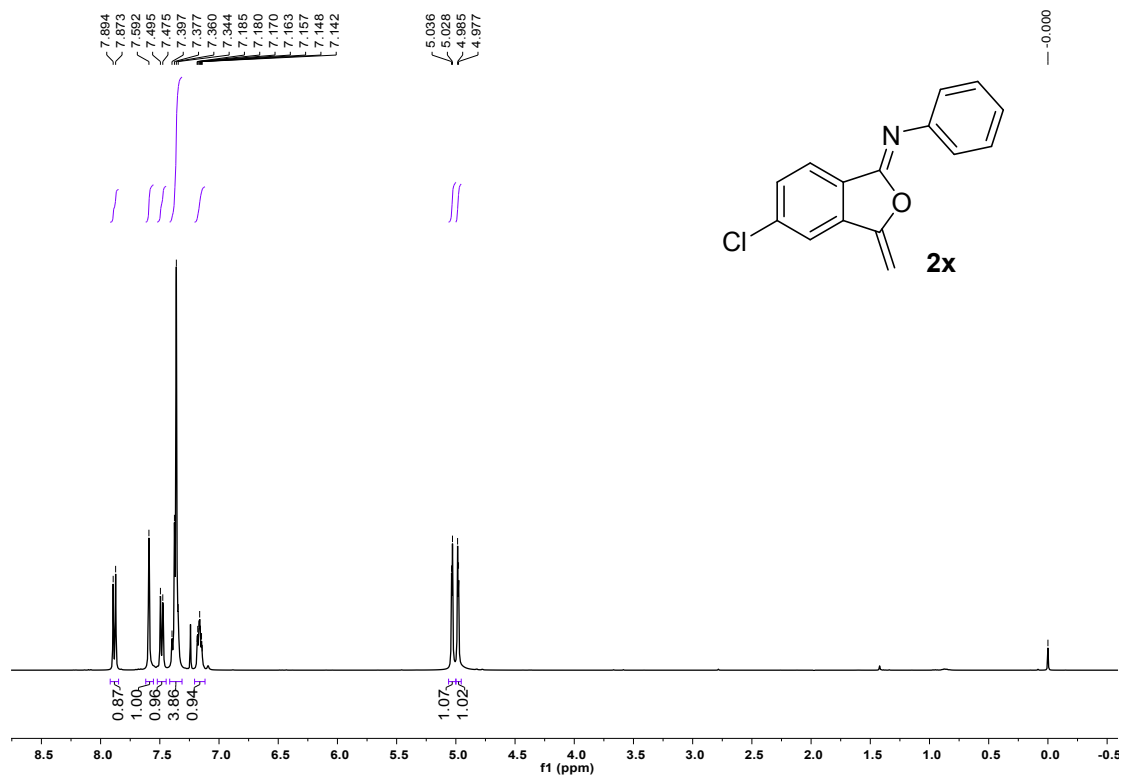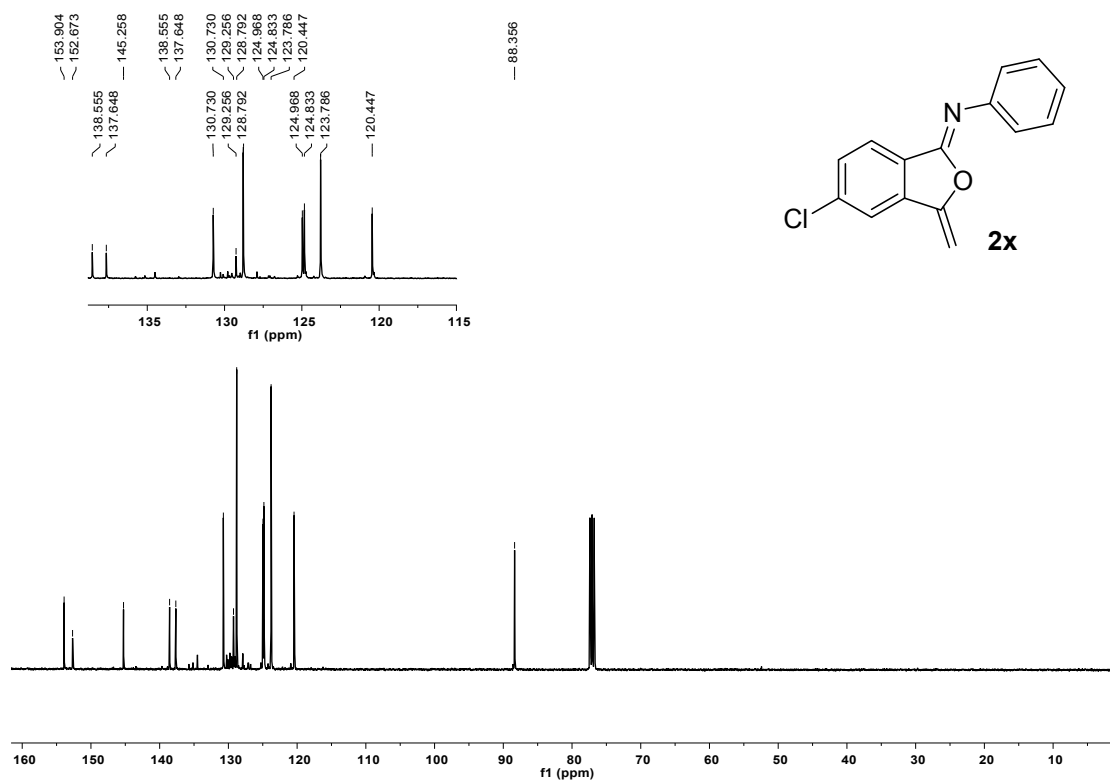

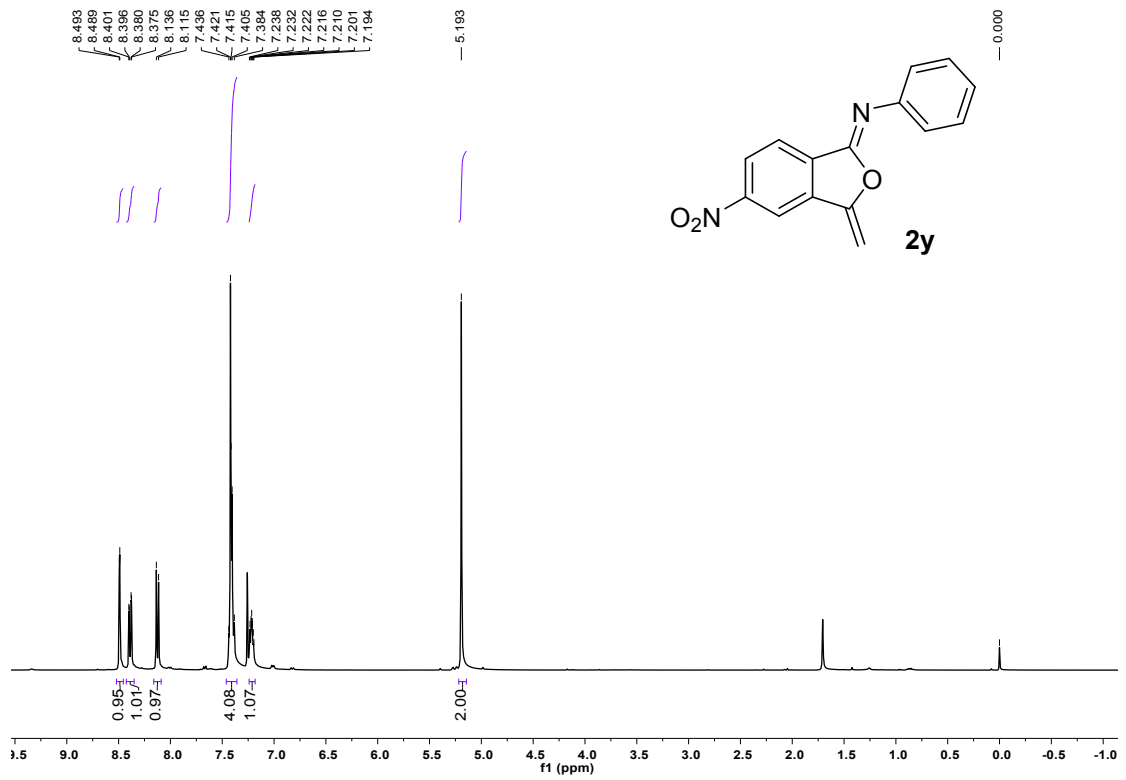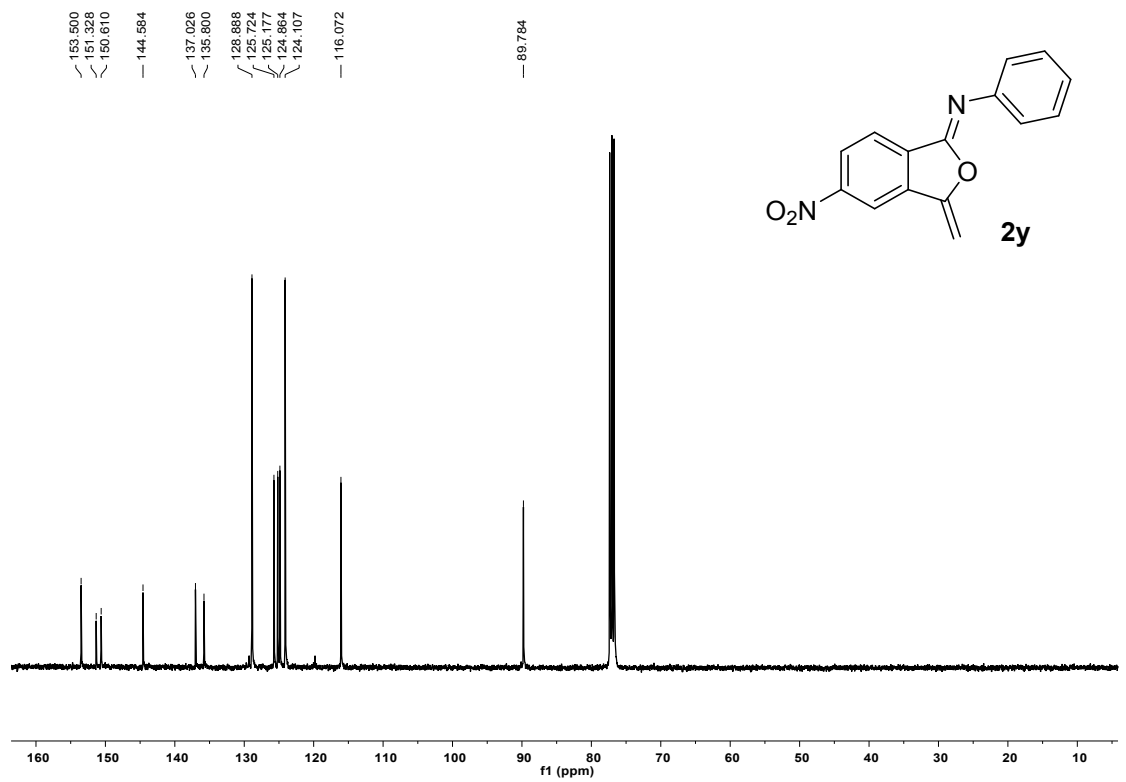



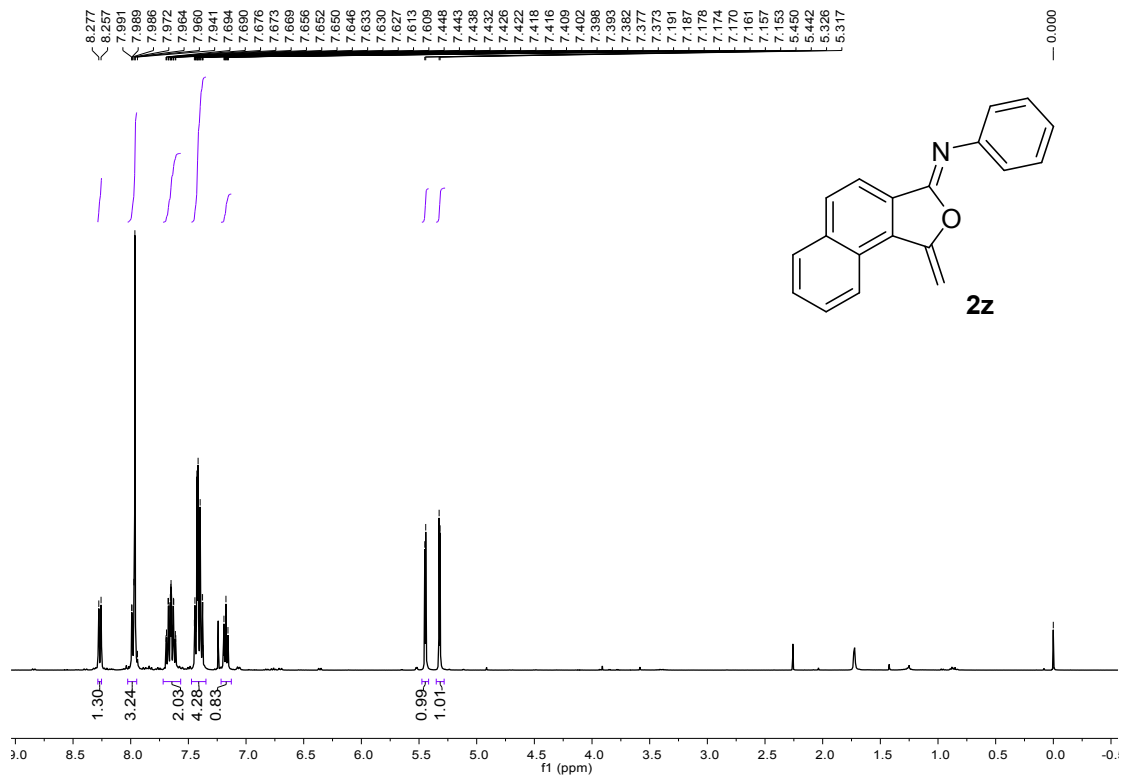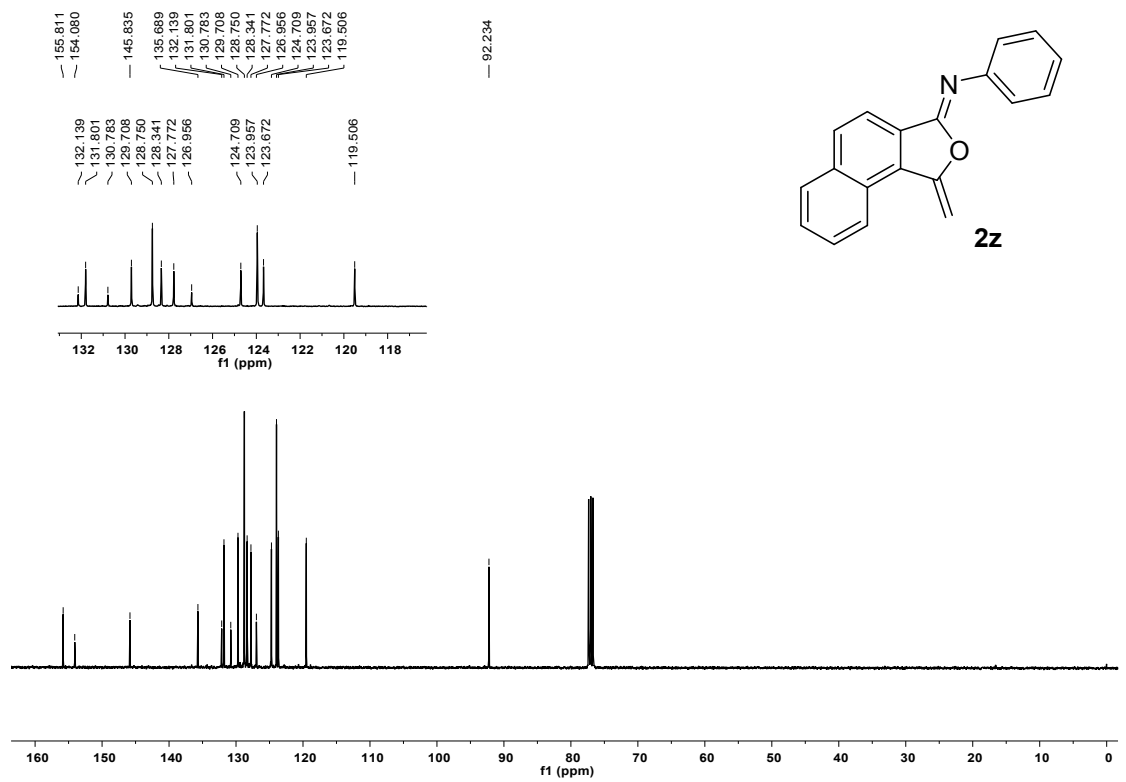

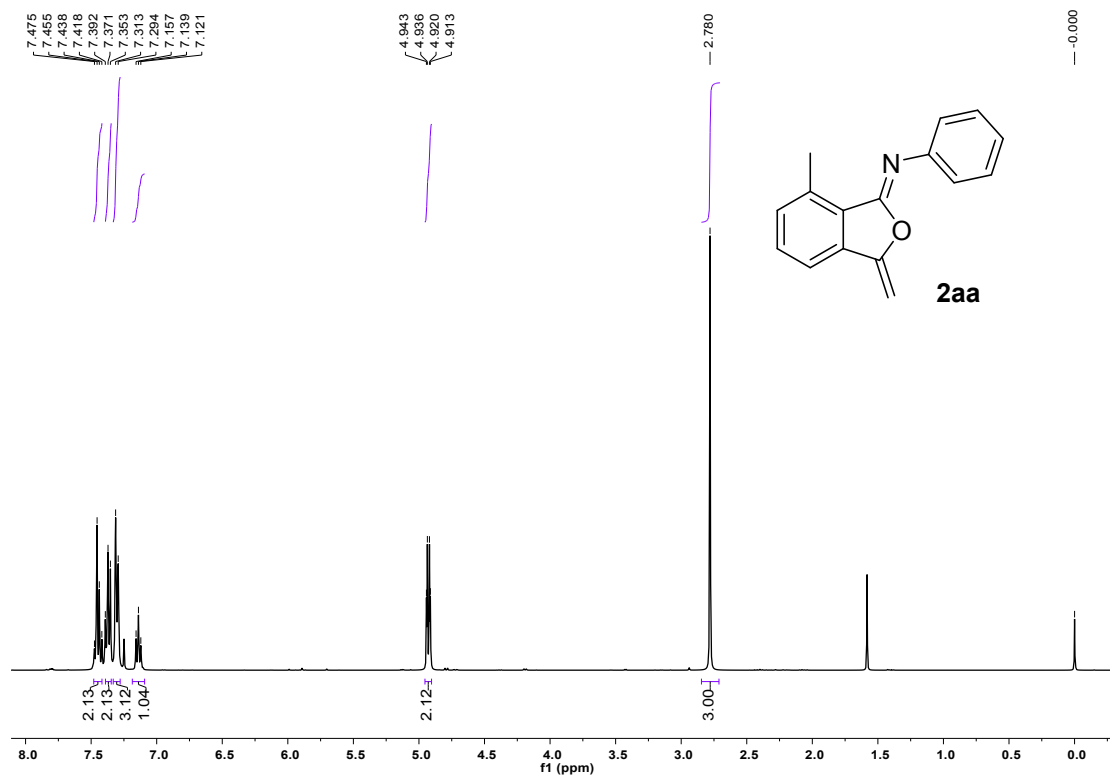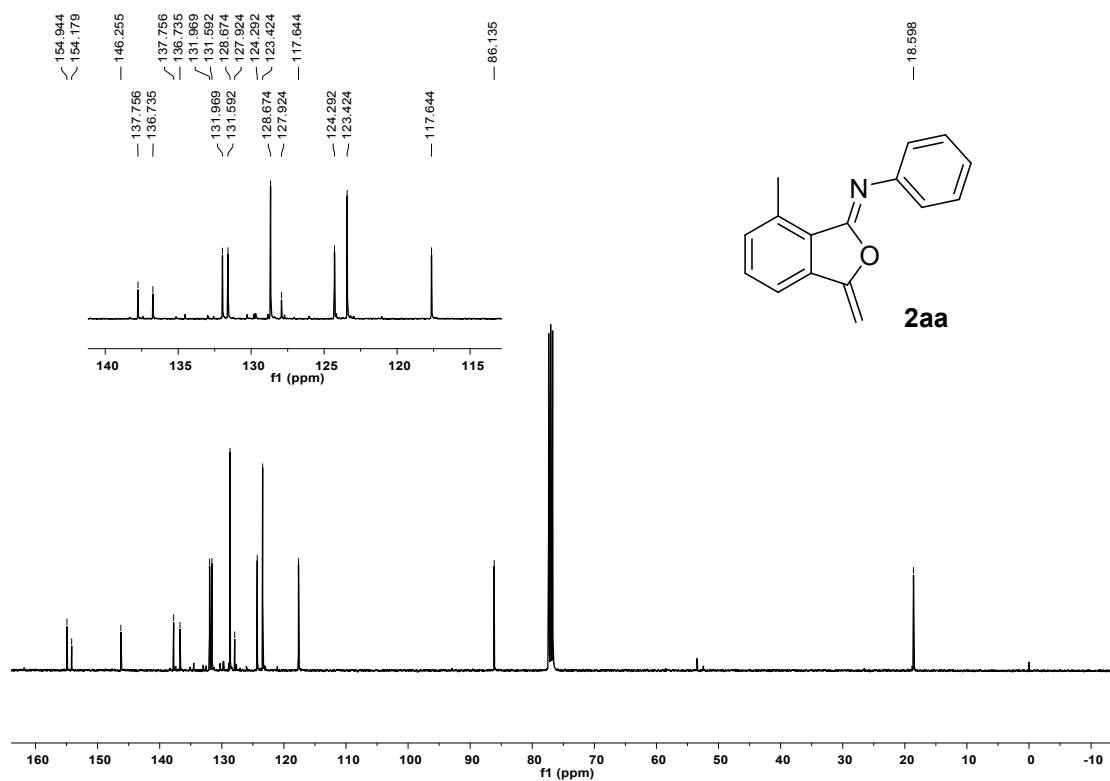

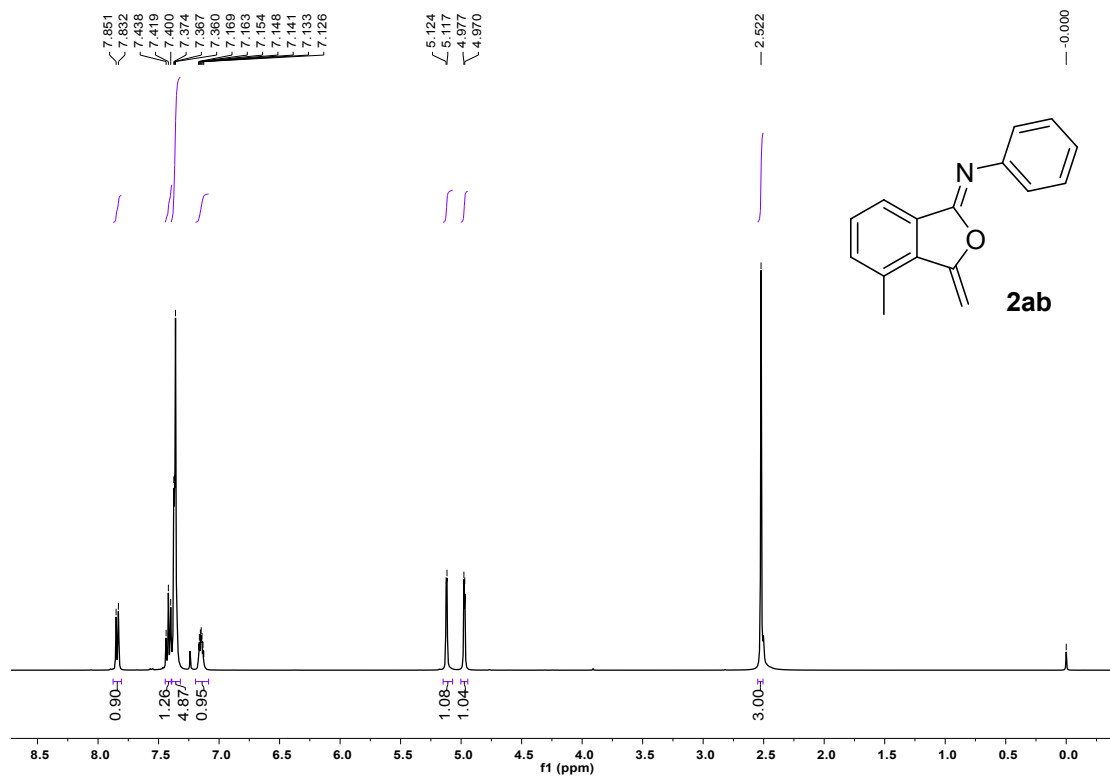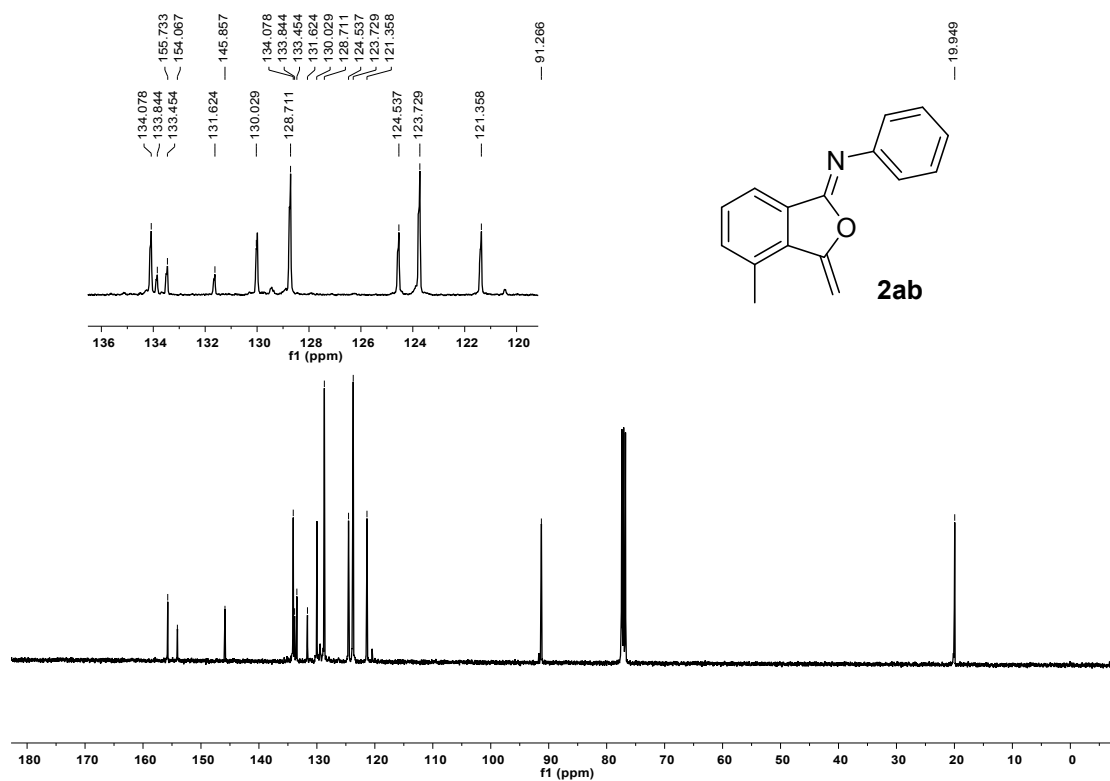

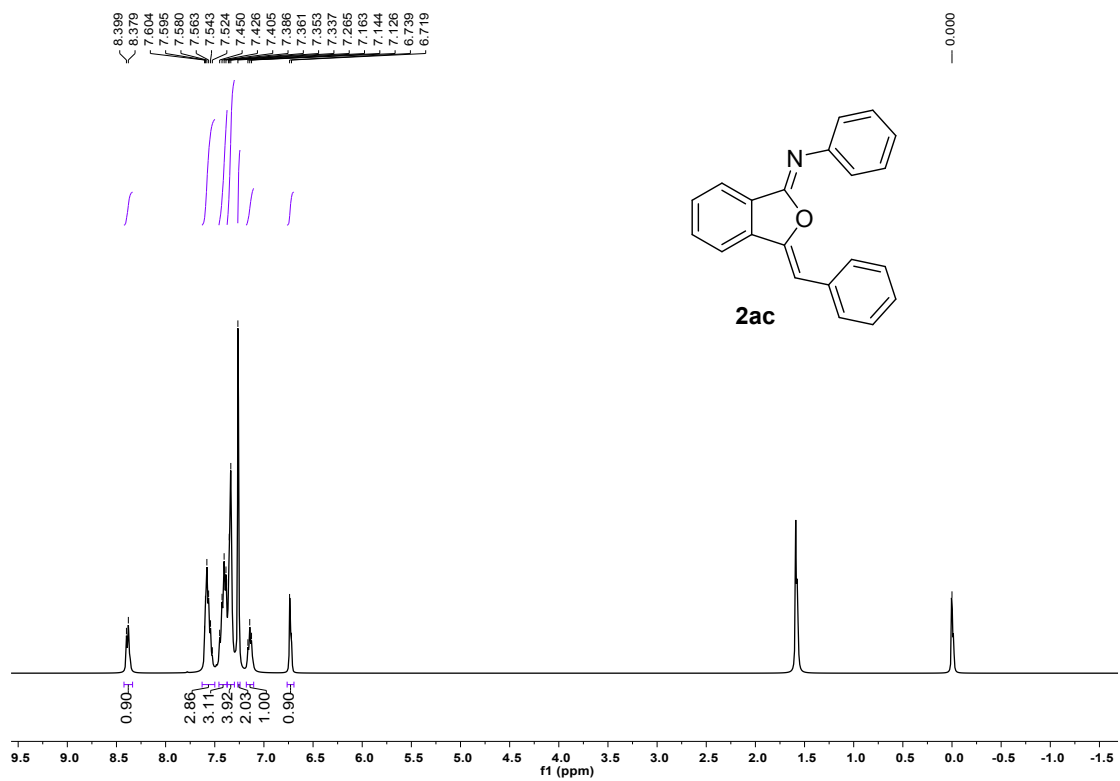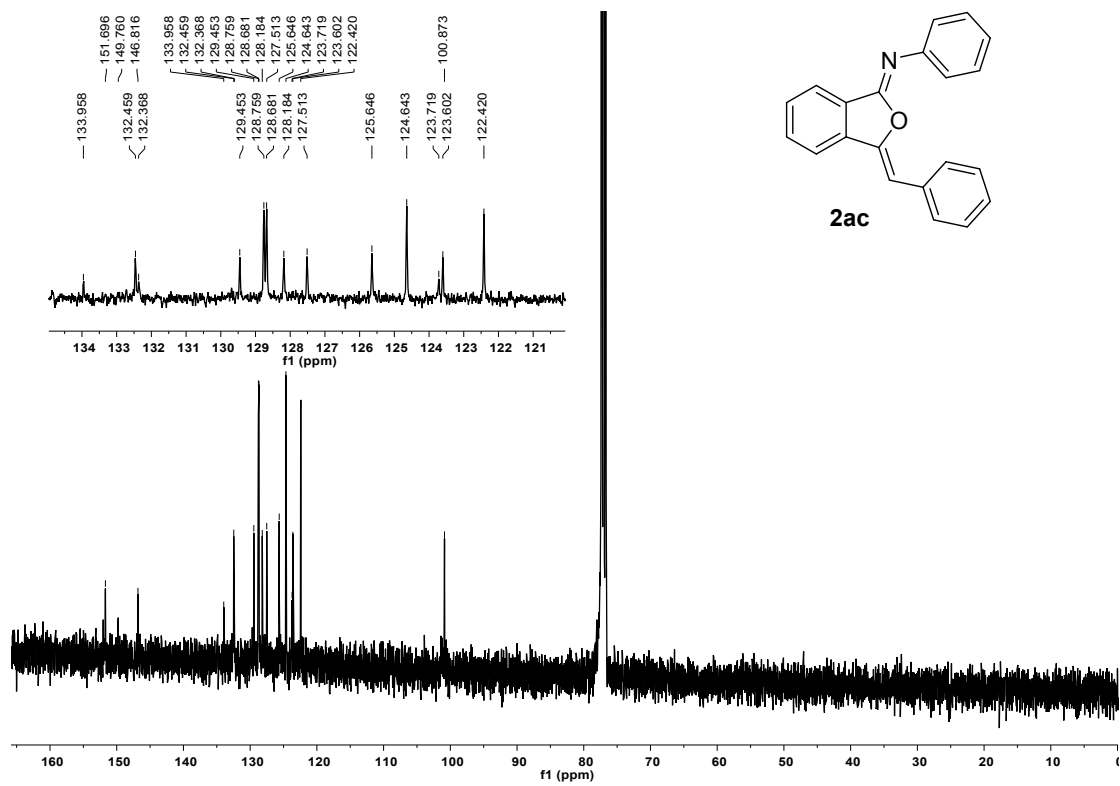



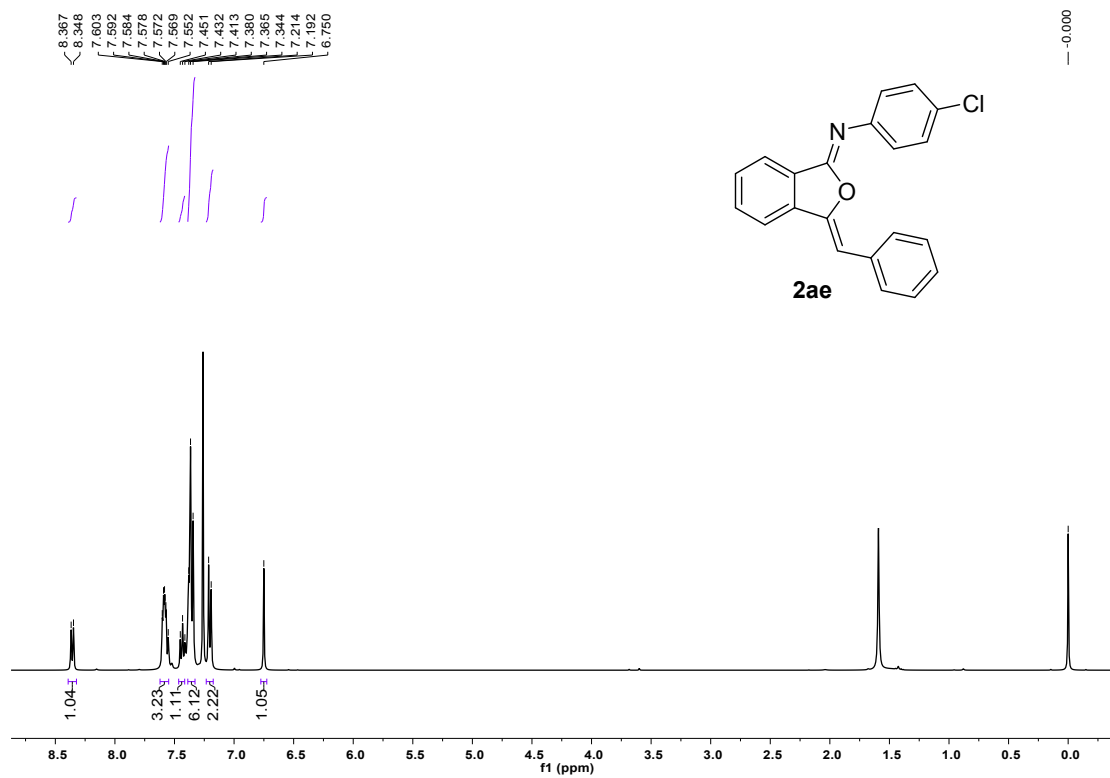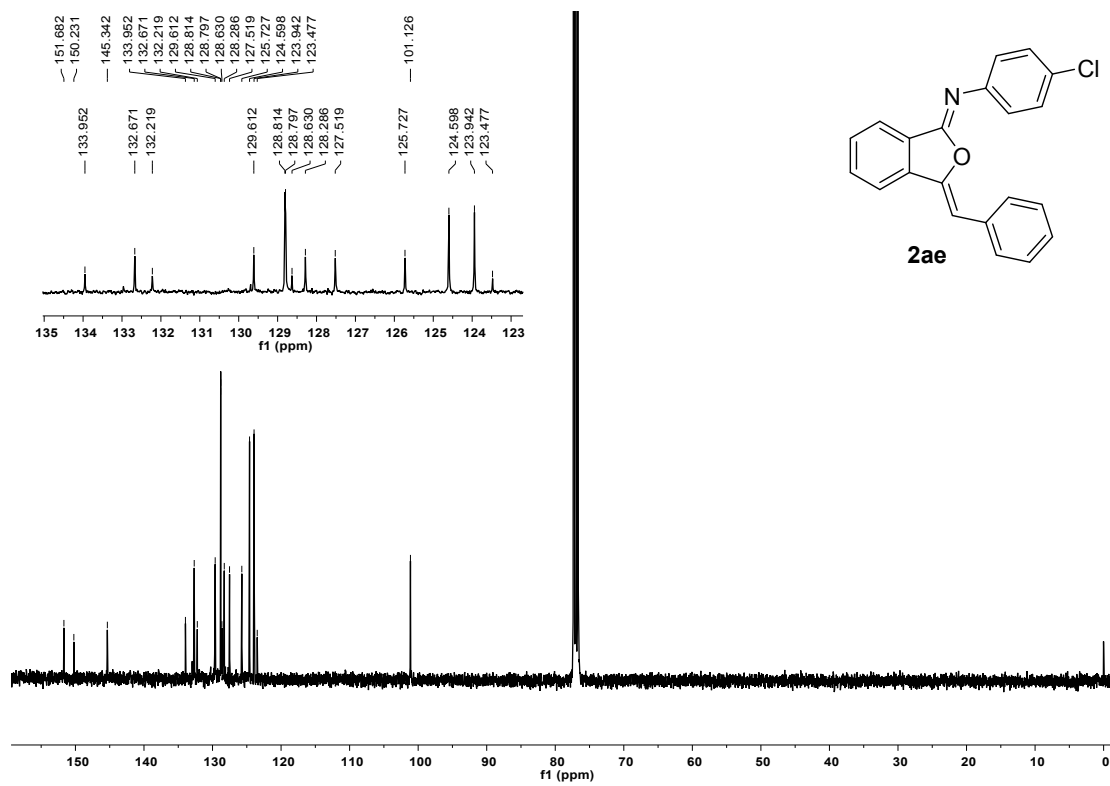

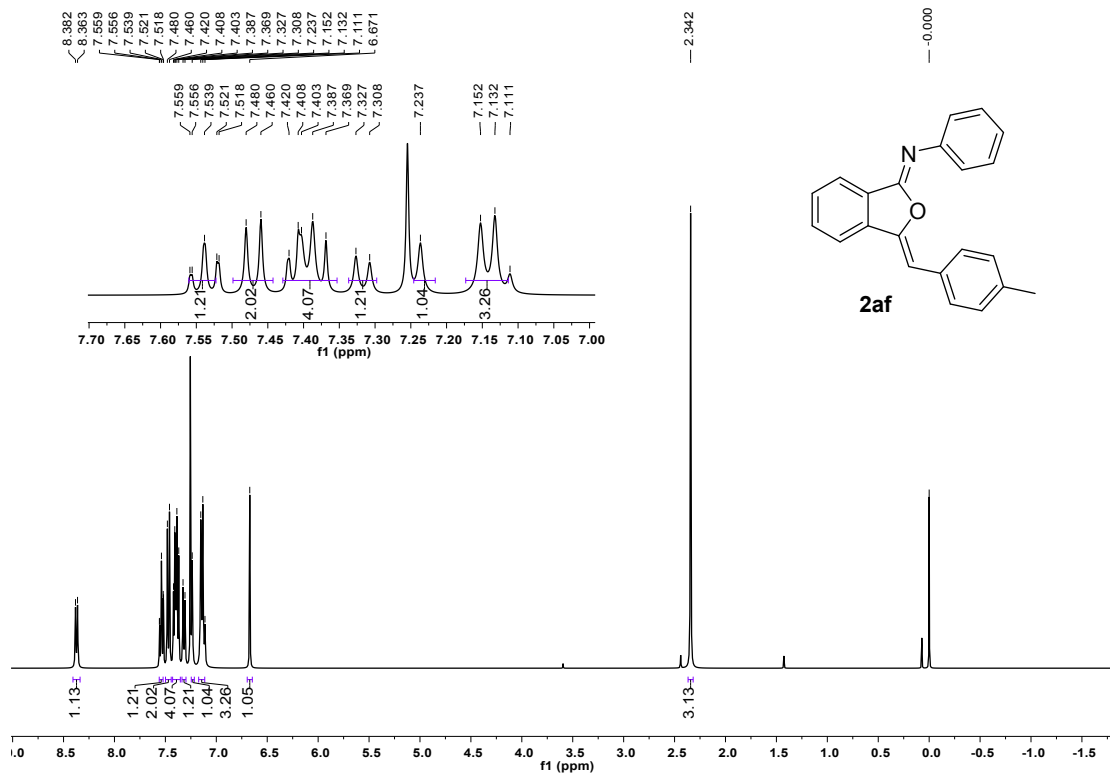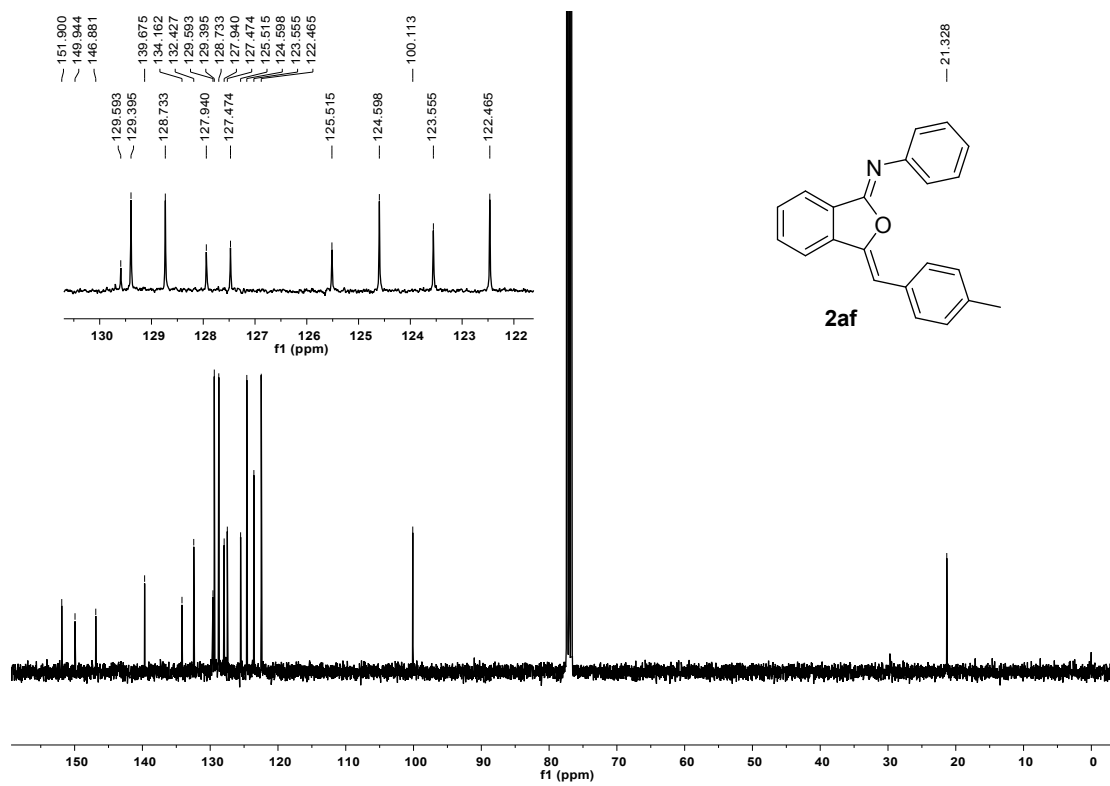

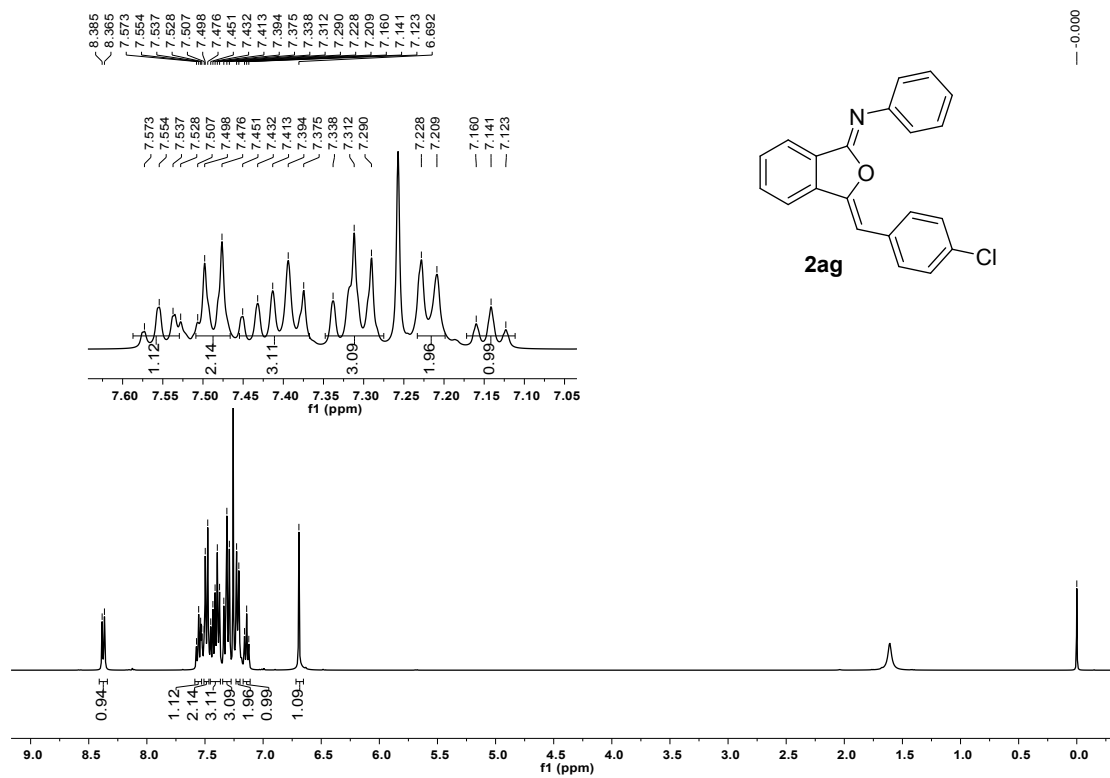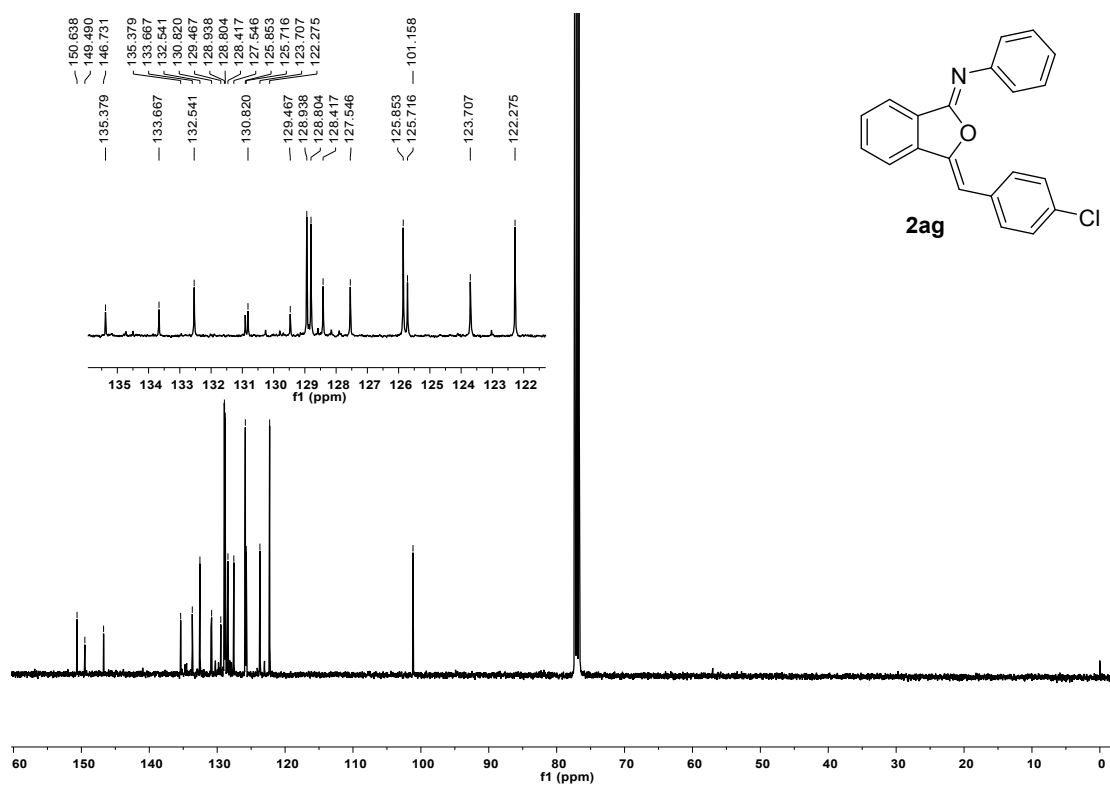



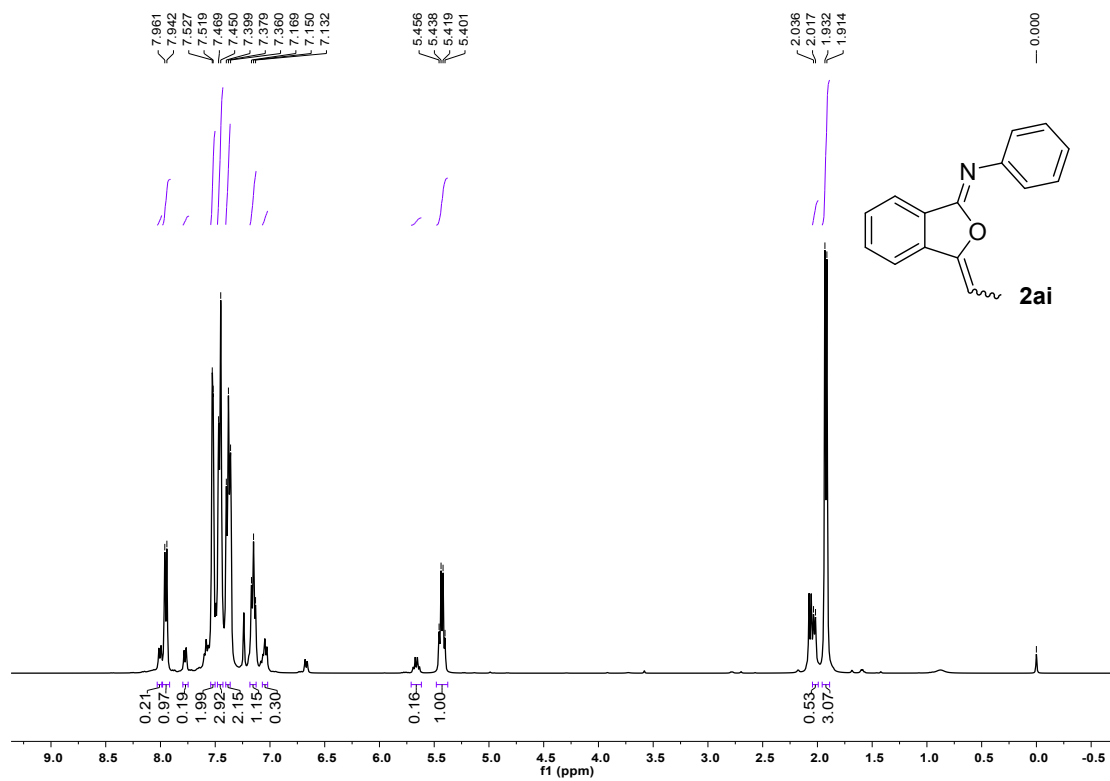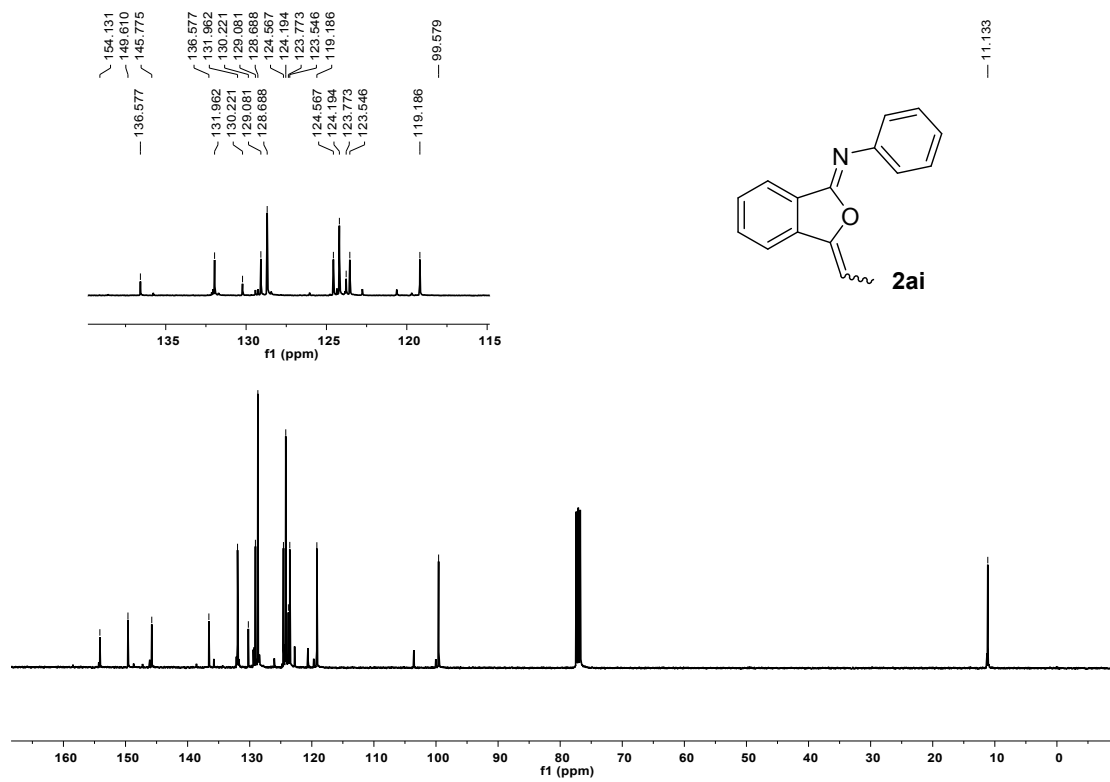

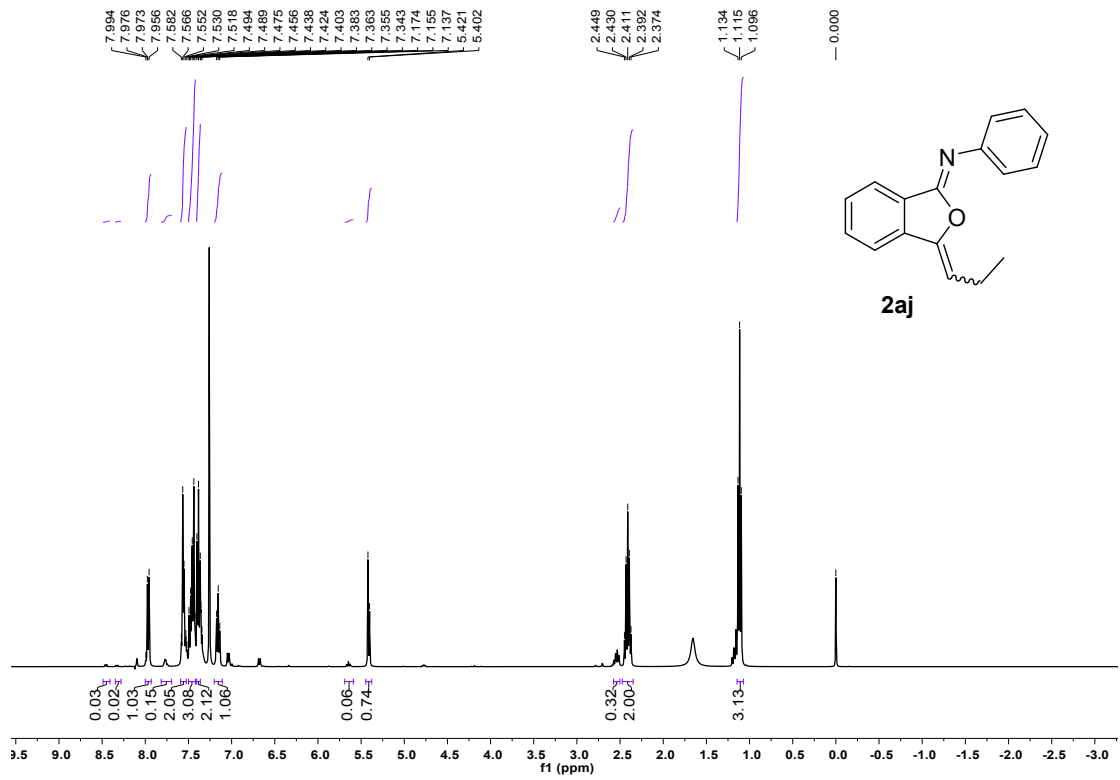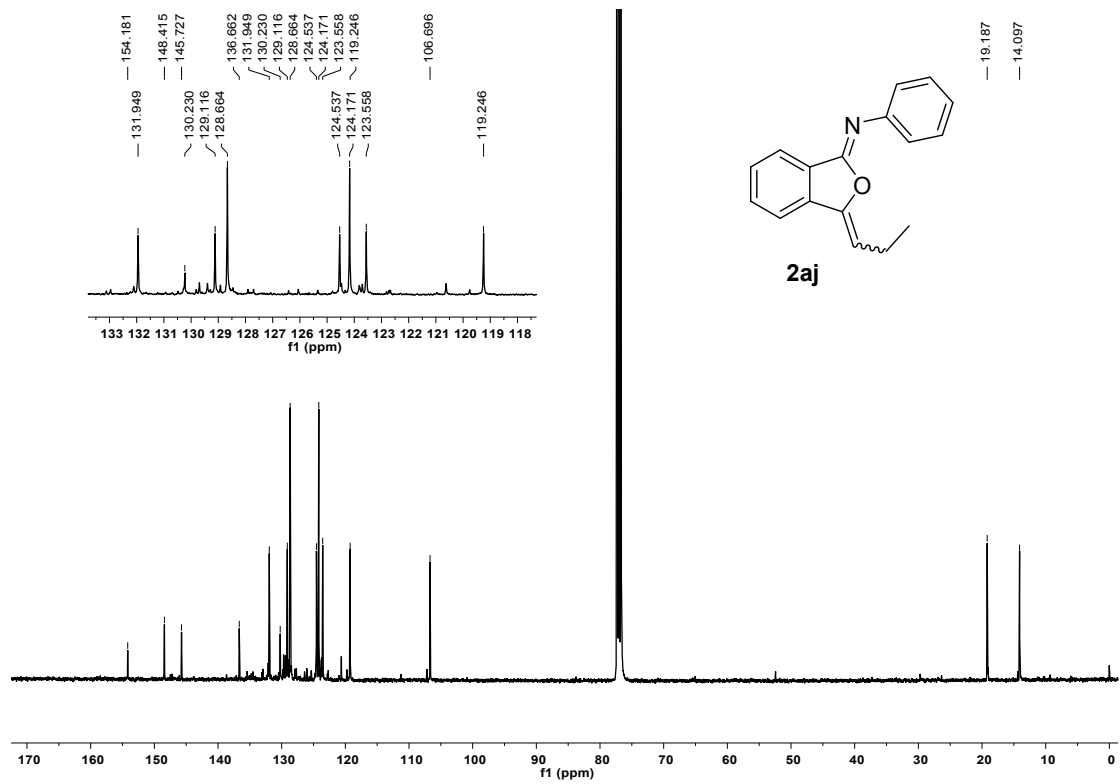

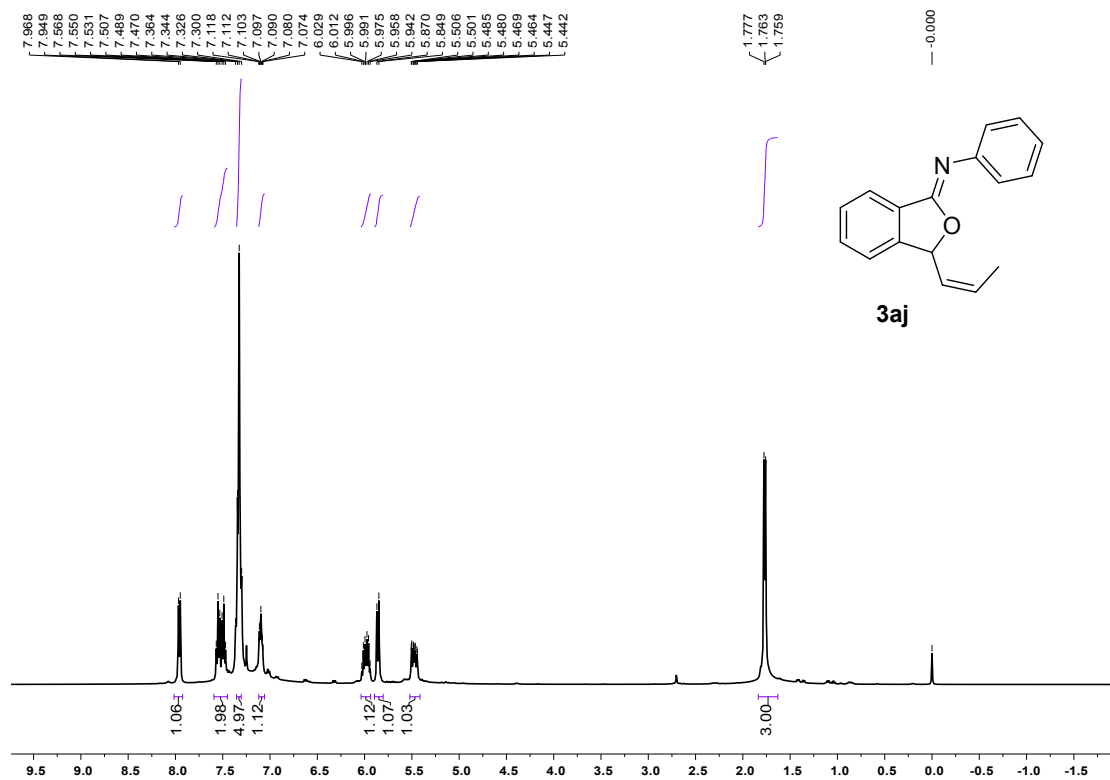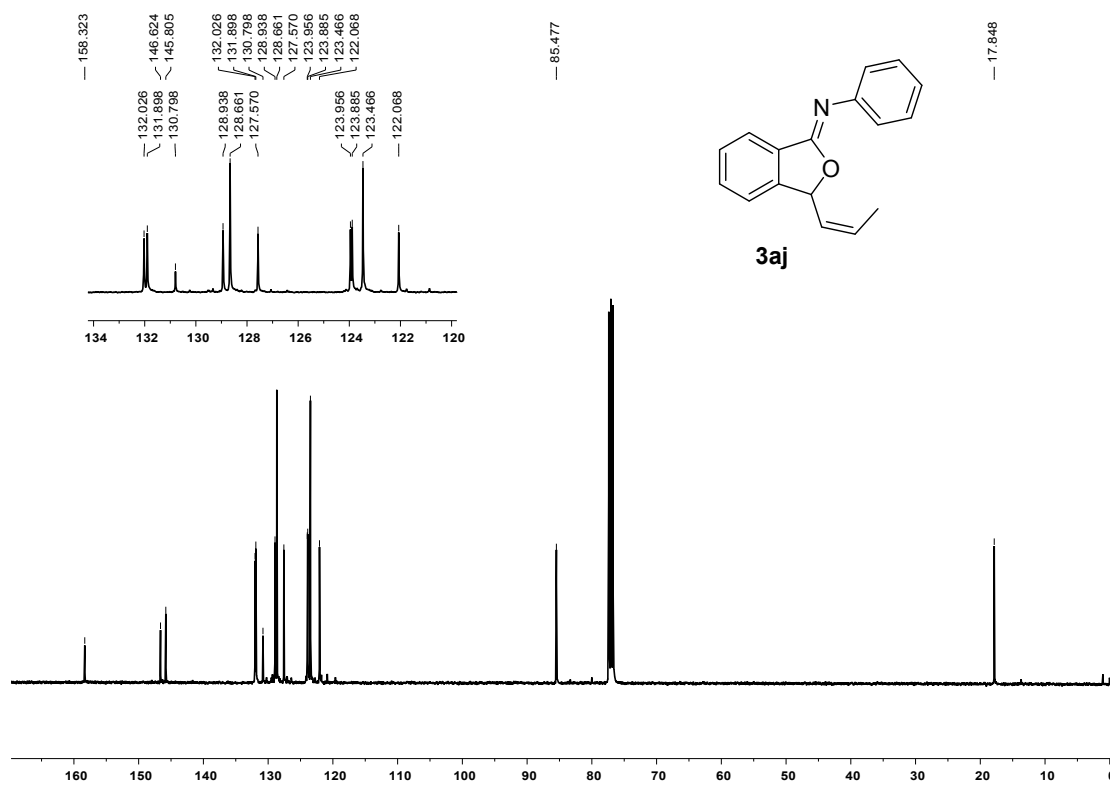

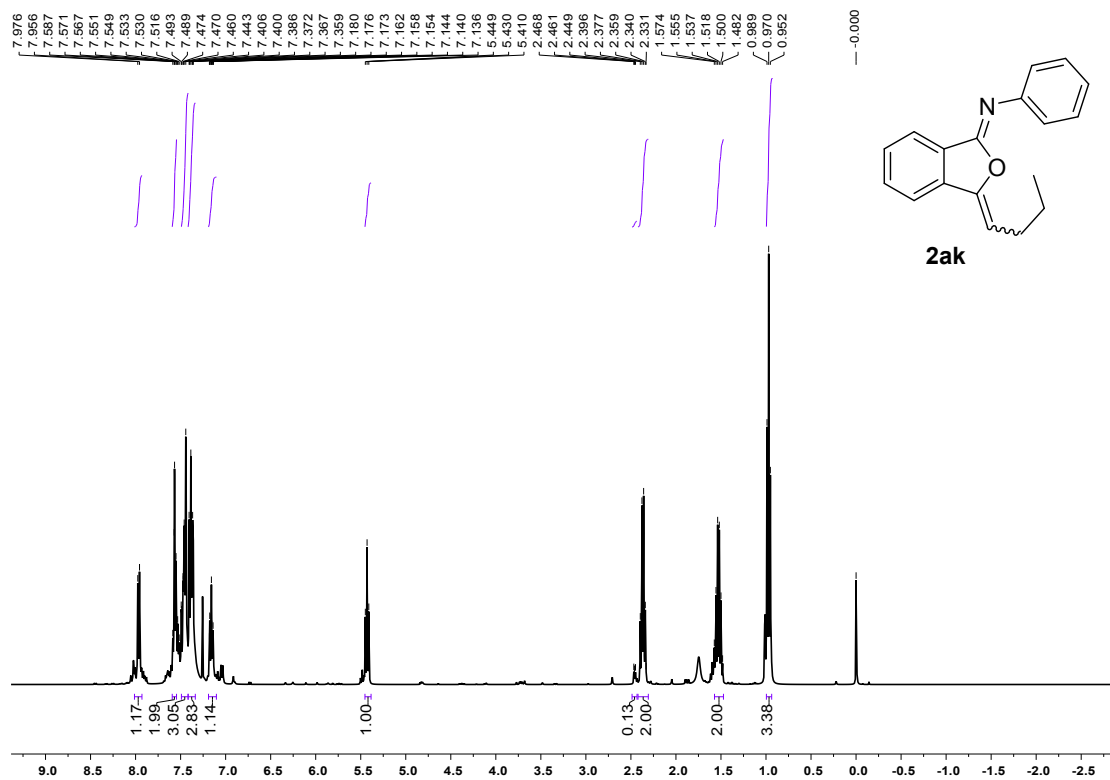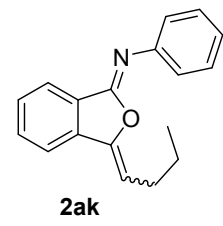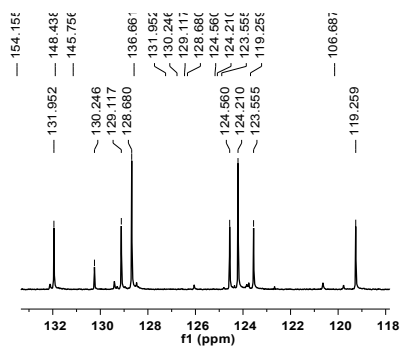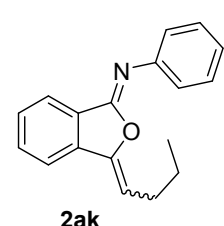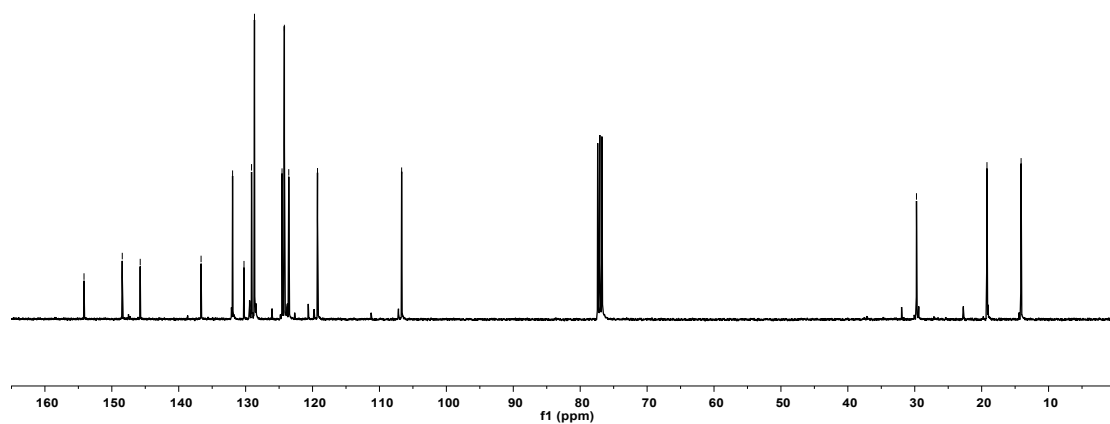

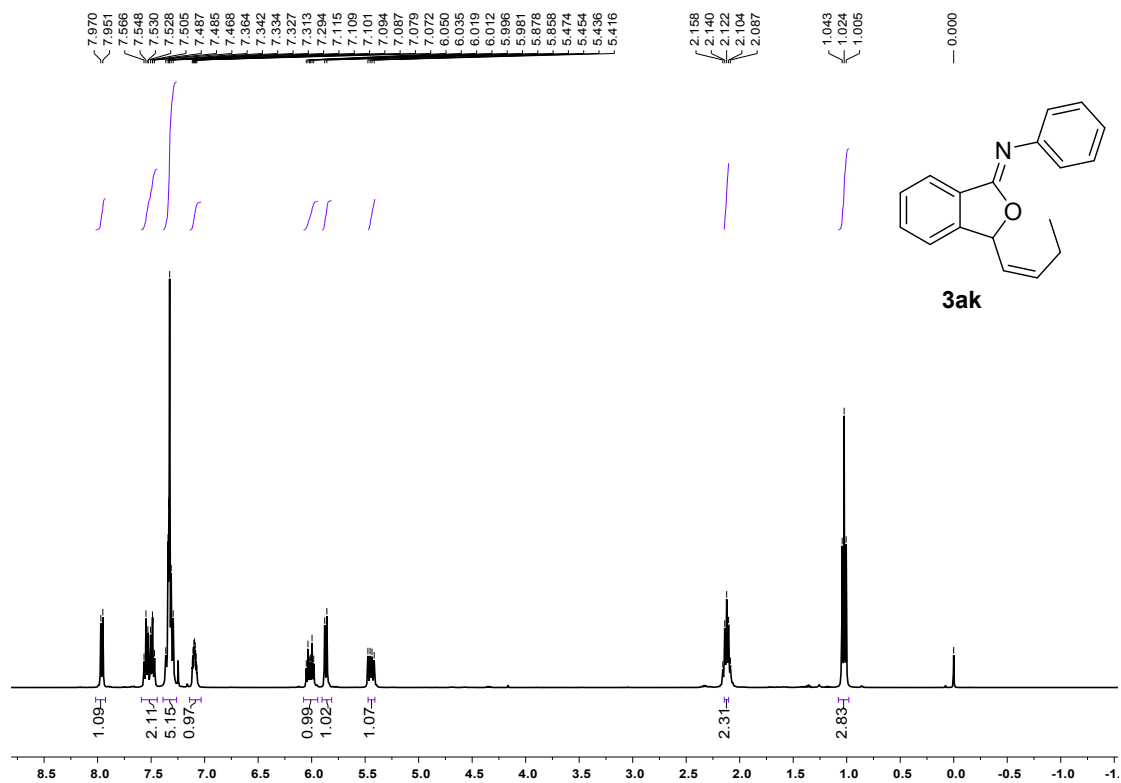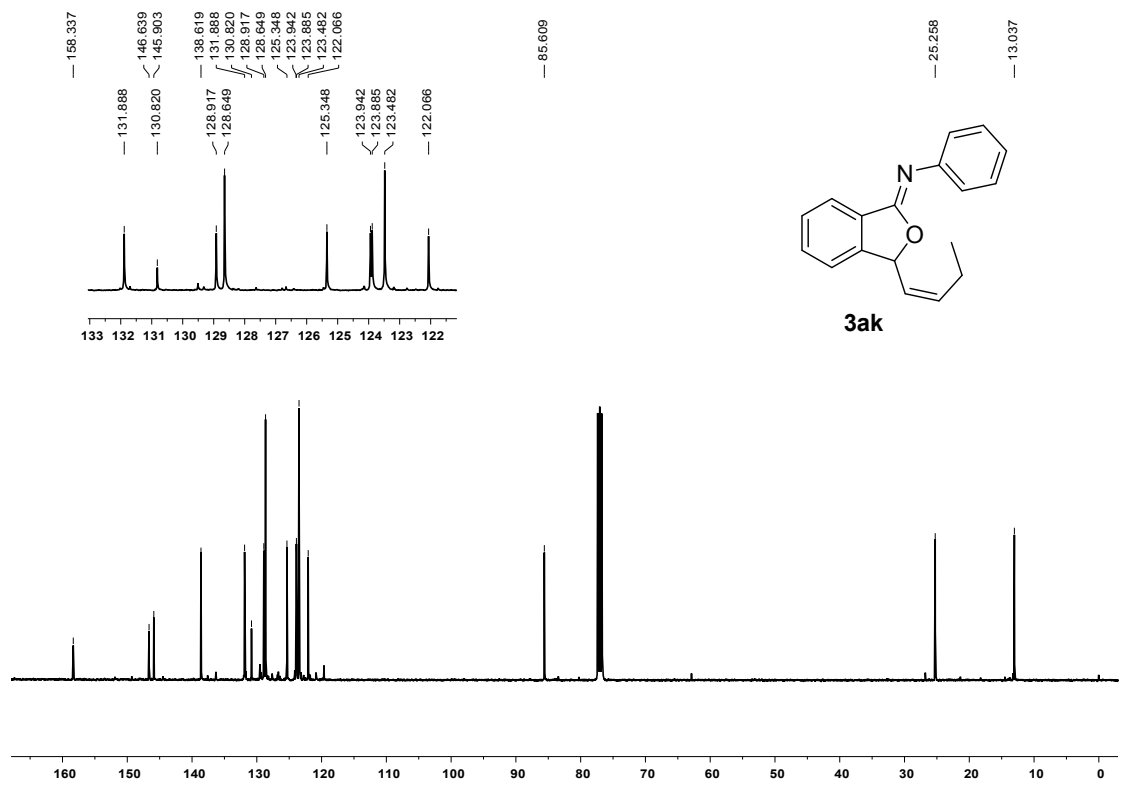

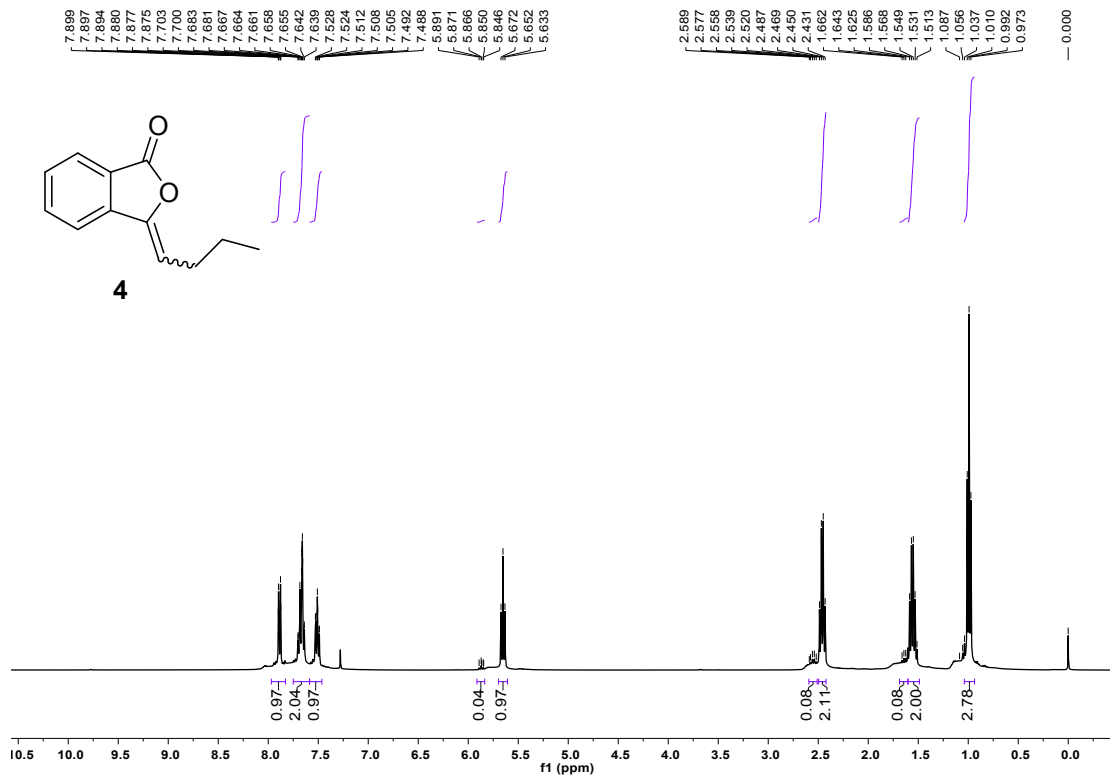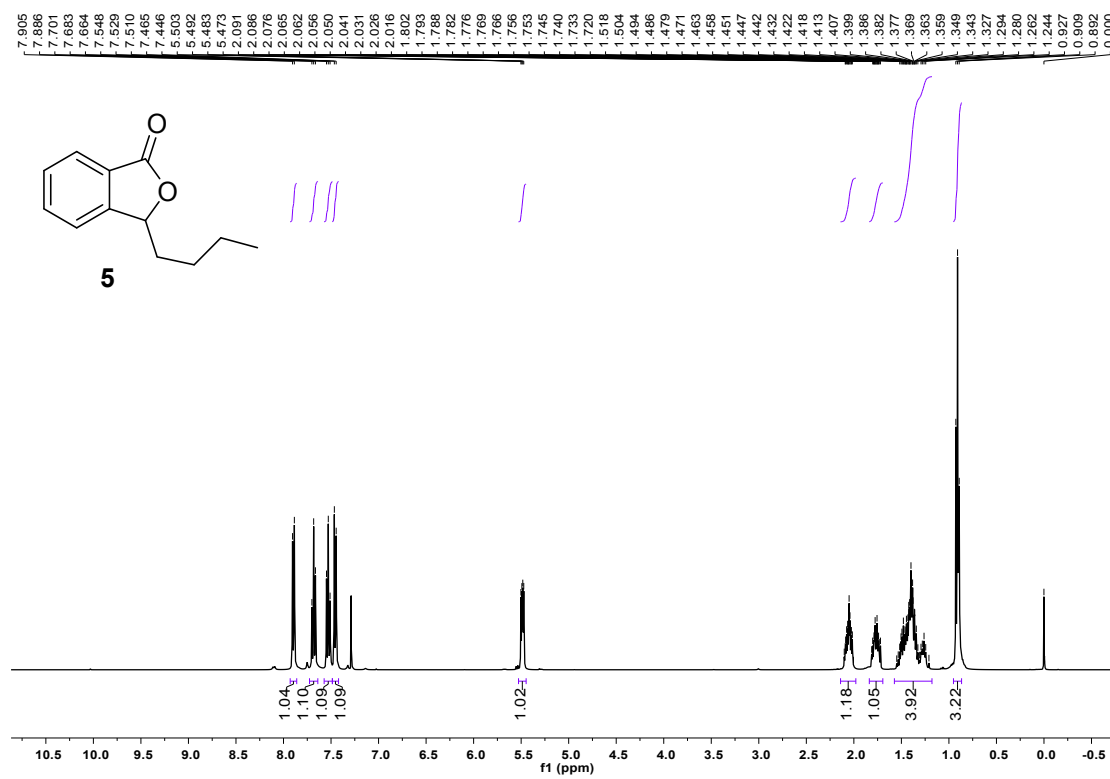

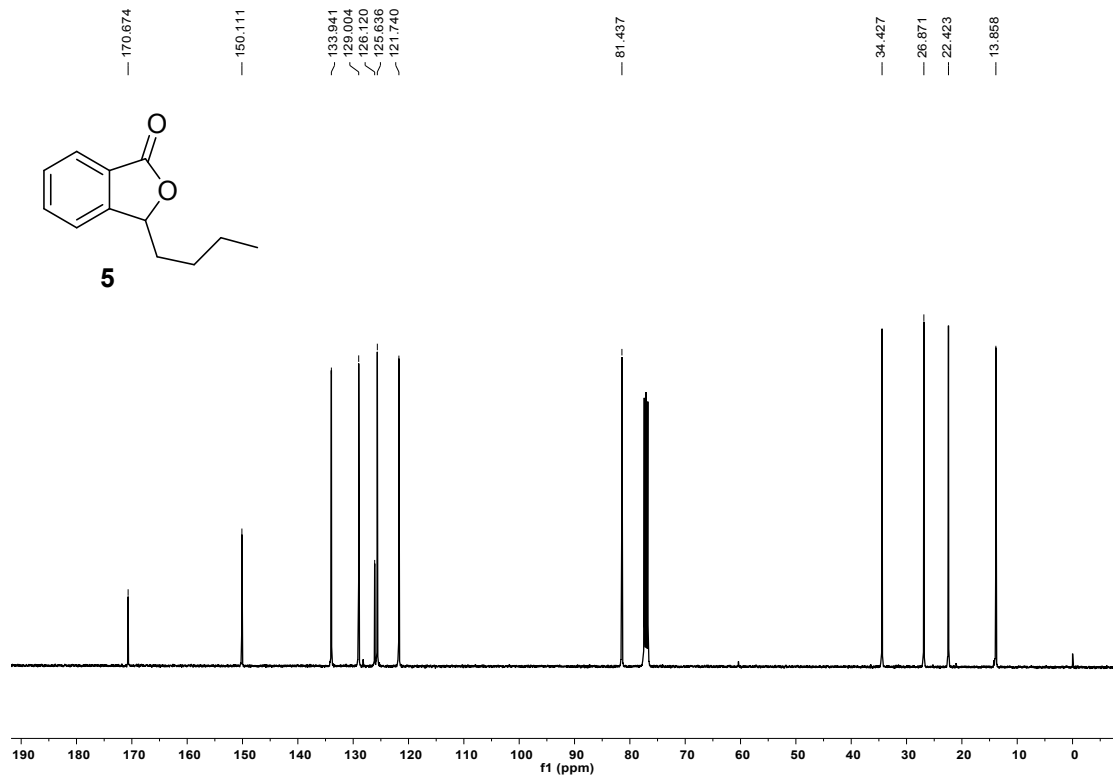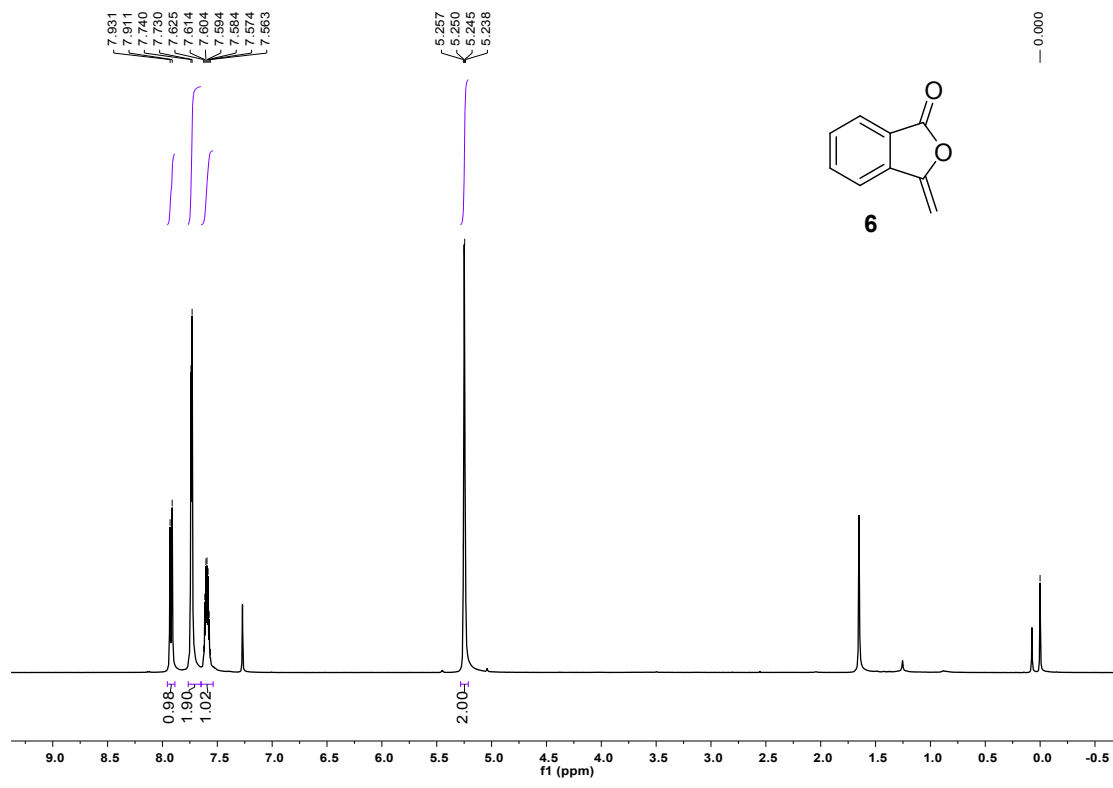

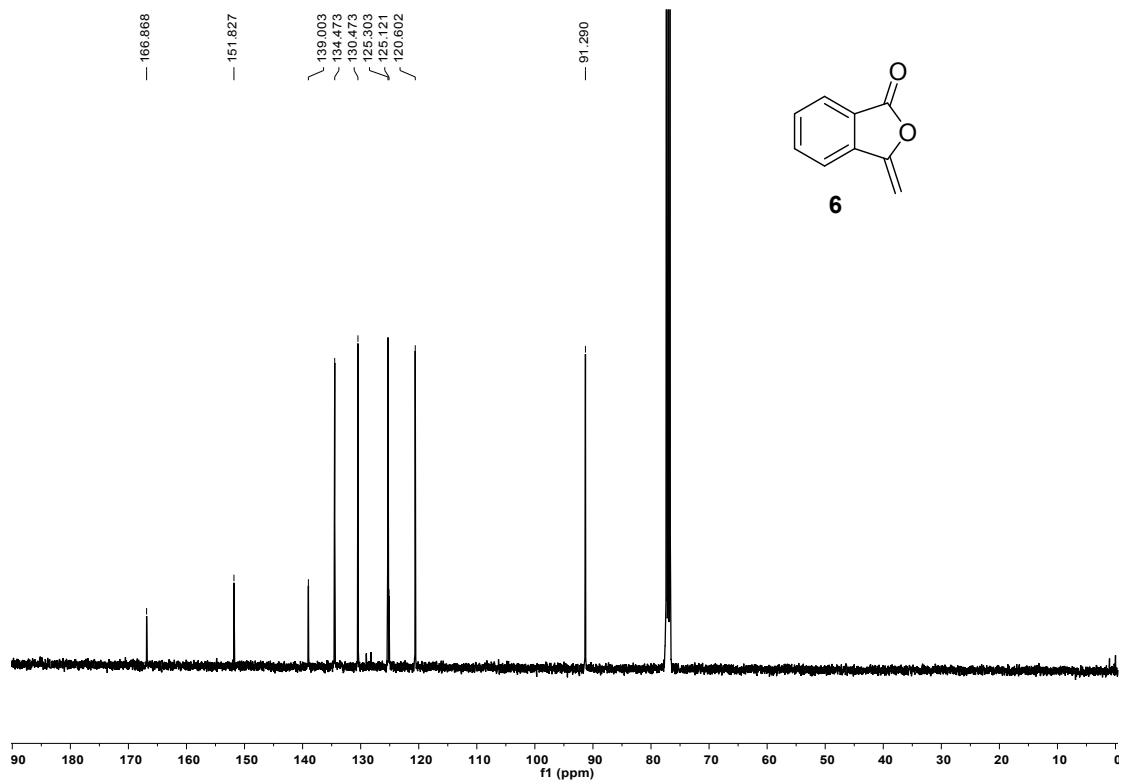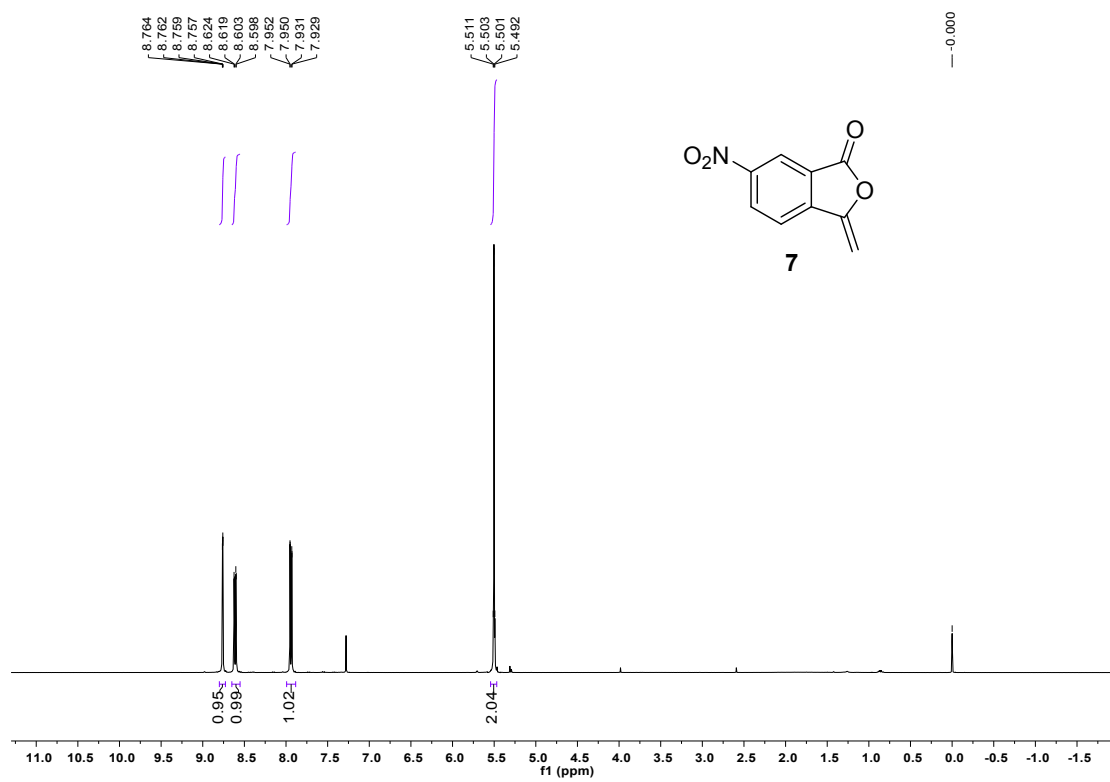



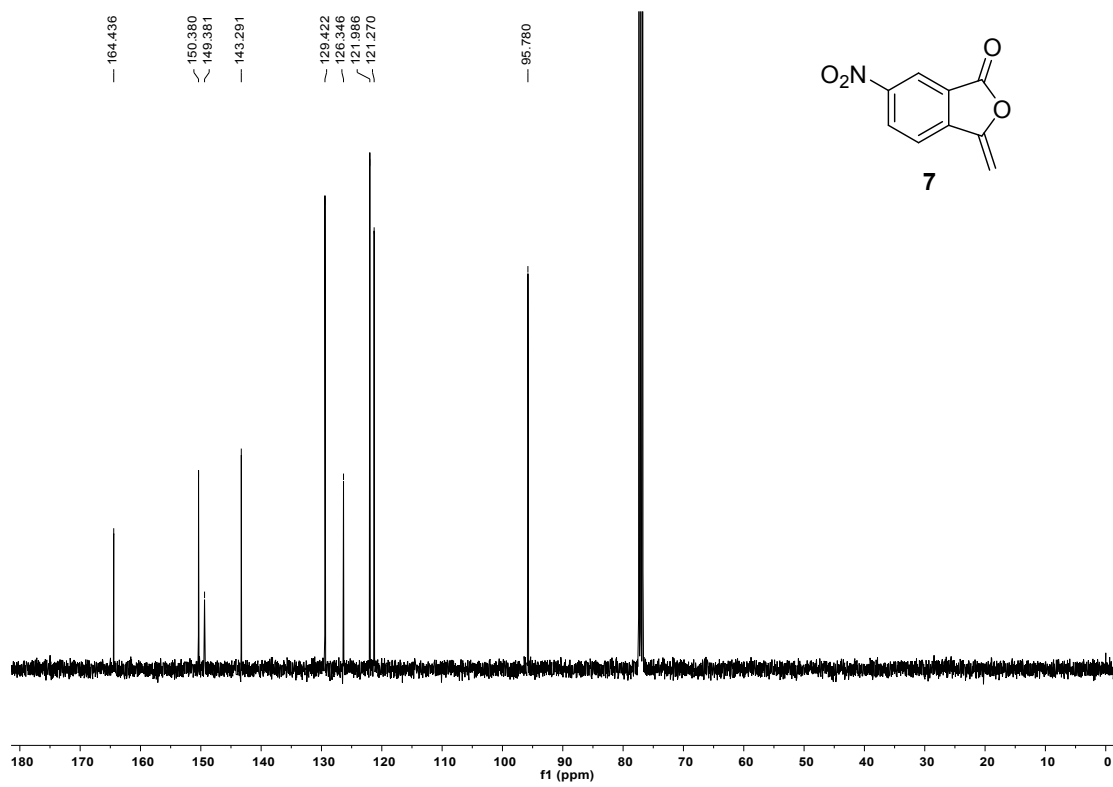

Supplement: d0ob00612b1.pdf [file d0ob00612b1.pdf]
